# Supplementary material for: Nickel-catalyzed dual C(sp2)–H activation of arenes: a new route to diaryl ethers
Source: Royal Society of Chemistry journal article supplement (doi:10.1039/d0qo00655f), 2020-01-01

## Electronic Supplementary Information (ESI)

### Nickel-Catalyzed Dual C(sp<sup>2</sup>)-H Activation of Arenes: A New Route to Diaryl Ether

Ningning Lv,<sup>†</sup> Zhengkai Chen,<sup>‡</sup> Shuling Yu,<sup>†</sup> Zhanxiang Liu,<sup>†</sup> Yuhong Zhang<sup>\*,†,§</sup>

<sup>†</sup>*Department of Chemistry, Zhejiang University, Hangzhou 310027, China.*

<sup>‡</sup>*Department of Chemistry, Zhejiang Sci-Tech University, Hangzhou 310018, China.*

<sup>§</sup>*State Key Laboratory of Applied Organic Chemistry, Lanzhou University, Lanzhou 730000, China.*

## Content

### 1. General Information

All chemicals were obtained from commercial sources and were used as received without any purification. Analytical thin-layer chromatography (TLC) was performed on pre-coated, glass-backed silica gel plates. Starting materials benzamides were synthesized according to corresponding acid or acid chloride reacting with 8-aminoquinoline.<sup>1-6</sup> Visualization of the developed chromatogram was performed by UV absorbance (254 nm). <sup>1</sup>H NMR spectra were recorded at 400 MHz and 500 MHz NMR spectrometers using TMS as an internal standard, <sup>13</sup>C NMR spectra were recorded at 100 MHz spectrometers using TMS as an internal standard, and were fully decoupled by broad band proton decoupling. The multiplicities are reported as follows: singlet (s), doublet (d), triplet (t), doublet of doublets

(dd), triplet of doublets multiplet (td), quarter (q), and broad (br). High-resolution mass spectra (HRMS) were recorded on Waters TOFMS GCT Premier using ESI ionization. GC-MS spectra were recorded using a HP6890 gas chromatograph with a HP5973 mass spectrometric detector equipped with an electron ionization source and a single-stage quadrupole. Melting points were measured with WRR digital point apparatus. Column chromatography was performed on silica gel column using ethyl acetate (EA)/petroleum ether(PE).

## 2. Experimental Section

### 2.1. General procedure for the preparation of benzamides from carboxylic acids.<sup>1-6</sup>

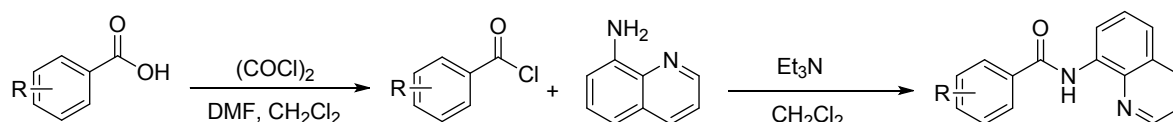

To a stirred solution of a carboxylic acid (15 mmol) and DMF (5 drops) in  $\text{CH}_2\text{Cl}_2$  (10 mL),  $(\text{COCl})_2$  (1.5 mL, 18 mmol) was added dropwise. The solution was stirred at room temperature for 2 h. The solvent was then removed by evaporation under reduced pressure, and the resulting residue was dissolved in  $\text{CH}_2\text{Cl}_2$  (15 mL). After cooling the reaction mixture to  $0\text{ }^\circ\text{C}$ , a solution of 8-aminoquinoline (17 mmol) and triethylamine (30 mmol) in 10 mL of the same solvent was added dropwise. The resulting mixture was allowed to warm to r.t. and stirred overnight. The solution containing the crude product was washed with saturated aqueous  $\text{NaHCO}_3$  (20 mL), and  $\text{CH}_2\text{Cl}_2$  ( $3 \times 20$  mL). The combined organic phase was washed with 1 M HCl aq. (20 mL). The organic phase was dried over anhydrous  $\text{Na}_2\text{SO}_4$  and the solvent removed by evaporation. The resulting crude amide was purified by flash chromatography on silica gel (eluent: hexane/EtOAc = 5/1) to give the corresponding benzamides.

### 2.2. Optimization of reaction conditions.

**Table S1.** Optimization of catalysts.<sup>a</sup>

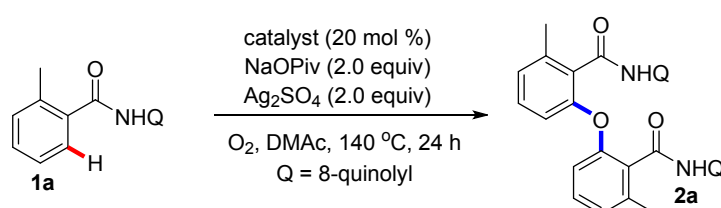

| entry | catalyst                                                         | oxidant                         | additive | solvent | yield(%) <sup>b</sup> |
|-------|------------------------------------------------------------------|---------------------------------|----------|---------|-----------------------|
| 1     | Ni(OAc) <sub>2</sub>                                             | Ag <sub>2</sub> SO <sub>4</sub> | NaOPiv   | DMAc    | 36                    |
| 2     | Ni(OAc) <sub>2</sub>                                             | Ag <sub>2</sub> SO <sub>4</sub> | -        | DMAc    | trace                 |
| 3     | Ni(OTf) <sub>2</sub>                                             | Ag <sub>2</sub> SO <sub>4</sub> | NaOPiv   | DMAc    | 28                    |
| 4     | Ni(acac) <sub>2</sub>                                            | Ag <sub>2</sub> SO <sub>4</sub> | NaOPiv   | DMAc    | nr                    |
| 5     | NiBr <sub>2</sub>                                                | Ag <sub>2</sub> SO <sub>4</sub> | NaOPiv   | DMAc    | 22                    |
| 6     | Ni(OH) <sub>2</sub>                                              | Ag <sub>2</sub> SO <sub>4</sub> | NaOPiv   | DMAc    | nr                    |
| 7     | Ni <sub>2</sub> CO <sub>3</sub>                                  | Ag <sub>2</sub> SO <sub>4</sub> | NaOPiv   | DMAc    | nr                    |
| 8     | Ni <sub>2</sub> Cl <sub>2</sub> (PPh <sub>3</sub> ) <sub>3</sub> | Ag <sub>2</sub> SO <sub>4</sub> | NaOPiv   | DMAc    | 20                    |
| 9     | Ni <sub>2</sub> Cl <sub>2</sub> (PCy <sub>3</sub> ) <sub>3</sub> | Ag <sub>2</sub> SO <sub>4</sub> | NaOPiv   | DMAc    | 21                    |

<sup>a</sup>Reactions were carried out by using **1a** (0.20 mmol), catalyst (20 mol %), Ag<sub>2</sub>SO<sub>4</sub> (2.0 equiv), NaOPiv (2.0 equiv), in solvent DMAc (2.0 mL), under O<sub>2</sub> atmosphere at 140 °C for 24 h. DMAc = *N,N*-dimethyl acetamide. <sup>b</sup>Isolated yield. nr = no reaction.

**Table S2.** Optimization of oxidants.<sup>a</sup>

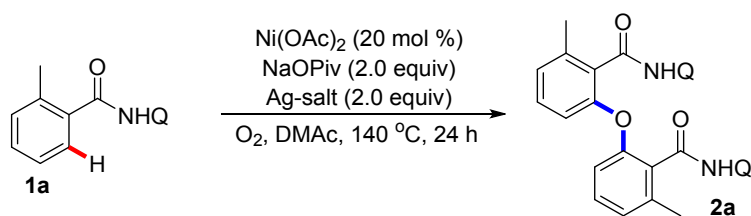

| entry           | catalyst             | oxidant                         | additive | solvent | yield(%) <sup>b</sup> |
|-----------------|----------------------|---------------------------------|----------|---------|-----------------------|
| 1               | Ni(OAc) <sub>2</sub> | Ag <sub>2</sub> SO <sub>4</sub> | NaOPiv   | DMAc    | 36                    |
| 2               | Ni(OAc) <sub>2</sub> | Ag <sub>3</sub> PO <sub>4</sub> | NaOPiv   | DMAc    | 45                    |
| 3               | Ni(OAc) <sub>2</sub> | Ag <sub>2</sub> CO <sub>3</sub> | NaOPiv   | DMAc    | 25                    |
| 4               | Ni(OAc) <sub>2</sub> | AgOAc                           | NaOPiv   | DMAc    | 21                    |
| 5               | Ni(OAc) <sub>2</sub> | AgNO <sub>3</sub>               | NaOPiv   | DMAc    | trace                 |
| 6               | Ni(OAc) <sub>2</sub> | AgNO <sub>2</sub>               | NaOPiv   | DMAc    | trace                 |
| 7               | Ni(OAc) <sub>2</sub> | AgI                             | NaOPiv   | DMAc    | 18                    |
| 8               | Ni(OAc) <sub>2</sub> | AgOPiv                          | NaOPiv   | DMAc    | 18                    |
| 9               | Ni(OAc) <sub>2</sub> | PhCOOAg·H <sub>2</sub> O        | NaOPiv   | DMAc    | trace                 |
| 10              | Ni(OAc) <sub>2</sub> | AgO                             | NaOPiv   | DMAc    | 16                    |
| 11              | Ni(OAc) <sub>2</sub> | AdCOOAg                         | NaOPiv   | DMAc    | 23                    |
| 12 <sup>c</sup> | Ni(OAc) <sub>2</sub> | Ag <sub>3</sub> PO <sub>4</sub> | NaOPiv   | DMAc    | trace                 |

<sup>a</sup>Reactions were carried out by using **1a** (0.20 mmol), Ni(OAc)<sub>2</sub> (20 mol %), Ag salt (2.0 equiv), NaOPiv (2.0 equiv), in solvent DMAc (2.0 mL), under O<sub>2</sub> atmosphere at 140 °C for 24 h. <sup>b</sup>Isolated yield. <sup>c</sup>0.2 equiv Ag<sub>3</sub>PO<sub>4</sub> was used.

**Table S3.** Optimization of additives.<sup>a</sup>

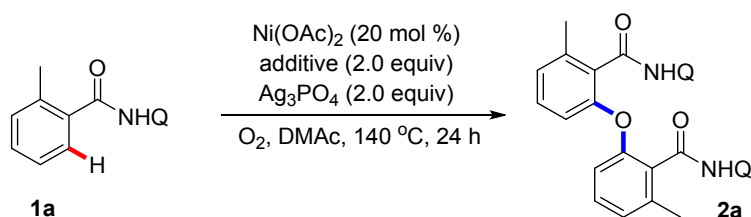

| entry | catalyst             | oxidant                         | additive                         | solvent | yield(%) <sup>b</sup> |
|-------|----------------------|---------------------------------|----------------------------------|---------|-----------------------|
| 1     | Ni(OAc) <sub>2</sub> | Ag <sub>3</sub> PO <sub>4</sub> | NaOPiv                           | DMAc    | 45                    |
| 2     | Ni(OAc) <sub>2</sub> | Ag <sub>3</sub> PO <sub>4</sub> | NaOAc                            | DMAc    | 38                    |
| 3     | Ni(OAc) <sub>2</sub> | Ag <sub>3</sub> PO <sub>4</sub> | HCOONa                           | DMAc    | nr                    |
| 4     | Ni(OAc) <sub>2</sub> | Ag <sub>3</sub> PO <sub>4</sub> | PhCOONa                          | DMAc    | 25                    |
| 5     | Ni(OAc) <sub>2</sub> | Ag <sub>3</sub> PO <sub>4</sub> | Na <sub>2</sub> CO <sub>3</sub>  | DMAc    | nr                    |
| 6     | Ni(OAc) <sub>2</sub> | Ag <sub>3</sub> PO <sub>4</sub> | NaHCO <sub>3</sub>               | DMAc    | nr                    |
| 7     | Ni(OAc) <sub>2</sub> | Ag <sub>3</sub> PO <sub>4</sub> | Na <sub>3</sub> PO <sub>4</sub>  | DMAc    | nr                    |
| 8     | Ni(OAc) <sub>2</sub> | Ag <sub>3</sub> PO <sub>4</sub> | Na <sub>2</sub> HPO <sub>4</sub> | DMAc    | nr                    |
| 9     | Ni(OAc) <sub>2</sub> | Ag <sub>3</sub> PO <sub>4</sub> | KOtBu                            | DMAc    | nr                    |
| 10    | Ni(OAc) <sub>2</sub> | Ag <sub>3</sub> PO <sub>4</sub> | LiOAc                            | DMAc    | 29                    |
| 11    | Ni(OAc) <sub>2</sub> | Ag <sub>3</sub> PO <sub>4</sub> | CF <sub>3</sub> COOK             | DMAc    | nr                    |
| 12    | Ni(OAc) <sub>2</sub> | Ag <sub>3</sub> PO <sub>4</sub> | PhOK                             | DMAc    | 36                    |
| 13    | Ni(OAc) <sub>2</sub> | Ag <sub>3</sub> PO <sub>4</sub> | KOPiv                            | DMAc    | 50                    |
| 14    | Ni(OAc) <sub>2</sub> | Ag <sub>3</sub> PO <sub>4</sub> | CsOPiv                           | DMAc    | 45                    |
| 15    | Ni(OAc) <sub>2</sub> | Ag <sub>3</sub> PO <sub>4</sub> | AdCOONa                          | DMAc    | 62                    |
| 16    | Ni(OAc) <sub>2</sub> | Ag <sub>3</sub> PO <sub>4</sub> | AdCOOK                           | DMAc    | 72                    |
| 17    | Ni(OAc) <sub>2</sub> | Ag <sub>3</sub> PO <sub>4</sub> | AdCOOCs                          | DMAc    | 60                    |
| 18    | Ni(OAc) <sub>2</sub> | Ag <sub>3</sub> PO <sub>4</sub> | AdCOOH                           | DMAc    | trace                 |

<sup>a</sup>Reactions were carried out by using **1a** (0.20 mmol), Ni(OAc)<sub>2</sub> (20 mol %), Ag<sub>3</sub>PO<sub>4</sub> (2.0 equiv), additive (2.0 equiv), in solvent DMAc (2.0 mL), under O<sub>2</sub> atmosphere at 140 °C for 24 h. <sup>b</sup>Isolated yield. AdCOOK = Potassium amantadate. nr = no reaction.

**Table S4.** Optimization of solvents.<sup>a</sup>

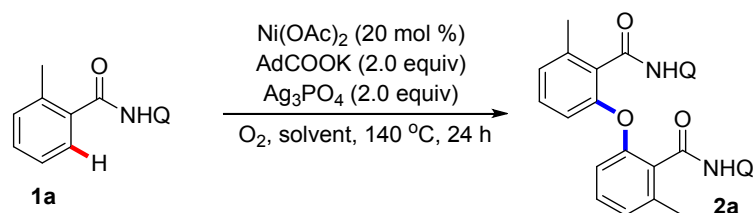

| entry           | catalyst             | oxidant                         | additive | solvent     | yield(%) <sup>b</sup> |
|-----------------|----------------------|---------------------------------|----------|-------------|-----------------------|
| 1               | Ni(OAc) <sub>2</sub> | Ag <sub>3</sub> PO <sub>4</sub> | AdCOOK   | DMAc        | 72                    |
| 2               | Ni(OAc) <sub>2</sub> | Ag <sub>3</sub> PO <sub>4</sub> | AdCOOK   | DMF         | 50                    |
| 3               | Ni(OAc) <sub>2</sub> | Ag <sub>3</sub> PO <sub>4</sub> | AdCOOK   | toluene     | nr                    |
| 4               | Ni(OAc) <sub>2</sub> | Ag <sub>3</sub> PO <sub>4</sub> | AdCOOK   | NMP         | 48                    |
| 5               | Ni(OAc) <sub>2</sub> | Ag <sub>3</sub> PO <sub>4</sub> | AdCOOK   | THF         | nr                    |
| 6               | Ni(OAc) <sub>2</sub> | Ag <sub>3</sub> PO <sub>4</sub> | AdCOOK   | 1,4-dioxane | nr                    |
| 7               | Ni(OAc) <sub>2</sub> | Ag <sub>3</sub> PO <sub>4</sub> | AdCOOK   | GDE         | nr                    |
| 8               | -                    | Ag <sub>3</sub> PO <sub>4</sub> | AdCOOK   | DMAc        | nr                    |
| 9               | Ni(OAc) <sub>2</sub> | -                               | AdCOOK   | DMAc        | nr                    |
| 10 <sup>c</sup> | Ni(OAc) <sub>2</sub> | Ag <sub>3</sub> PO <sub>4</sub> | AdCOOK   | DMAc        | 55                    |
| 11 <sup>d</sup> | Ni(OAc) <sub>2</sub> | Ag <sub>3</sub> PO <sub>4</sub> | AdCOOK   | DMAc        | 51                    |
| 12 <sup>e</sup> | Ni(OAc) <sub>2</sub> | Ag <sub>3</sub> PO <sub>4</sub> | AdCOOK   | DMAc        | 53                    |
| 13 <sup>f</sup> | Ni(OAc) <sub>2</sub> | Ag <sub>3</sub> PO <sub>4</sub> | AdCOOK   | DMAc        | 50                    |

|                 |                                         |                                 |        |      |        |
|-----------------|-----------------------------------------|---------------------------------|--------|------|--------|
| 14 <sup>g</sup> | Ni(OAc) <sub>2</sub>                    | Ag <sub>3</sub> PO <sub>4</sub> | AdCOOK | DMAc | 33(20) |
| 15 <sup>h</sup> | Ni(OAc) <sub>2</sub>                    | Ag <sub>3</sub> PO <sub>4</sub> | AdCOOK | DMAc | 70     |
| 16 <sup>i</sup> | Ni(OAc) <sub>2</sub>                    | Ag <sub>3</sub> PO <sub>4</sub> | AdCOOK | DMAc | 62     |
| 17              | Co(OAc) <sub>2</sub> ·4H <sub>2</sub> O | Ag <sub>3</sub> PO <sub>4</sub> | AdCOOK | DMAc | nr     |

<sup>a</sup>Reactions were carried out by using **1a** (0.20 mmol), Ni(OAc)<sub>2</sub> (20 mol %), Ag<sub>3</sub>PO<sub>4</sub> (2.0 equiv), AdCOOK (2.0 equiv), in solvent (2.0 mL), under O<sub>2</sub> atmosphere at 140 °C for 24 h. <sup>b</sup>Isolated yield. DMF = *N,N*-dimethyl formamide. NMP = *N*-methylpyrrolidone. THF = tetrahydrofuran. GDE = 1,2-Dimethoxyethane. nr = no reaction. <sup>c</sup>10 mol % Ni(OAc)<sub>2</sub> was used. <sup>d</sup>1.0 equiv. Ag<sub>3</sub>PO<sub>4</sub> was used. <sup>e</sup>1.0 equiv. AdCOOK was used. <sup>f</sup>under air atmosphere. <sup>g</sup>under N<sub>2</sub> atmosphere, the alkylated product was obtained in 20% yield. <sup>h</sup>T = 150 °C. <sup>i</sup>T = 130 °C.

**Table S5.** The effect of diverse Bidentate directing groups.<sup>a</sup>

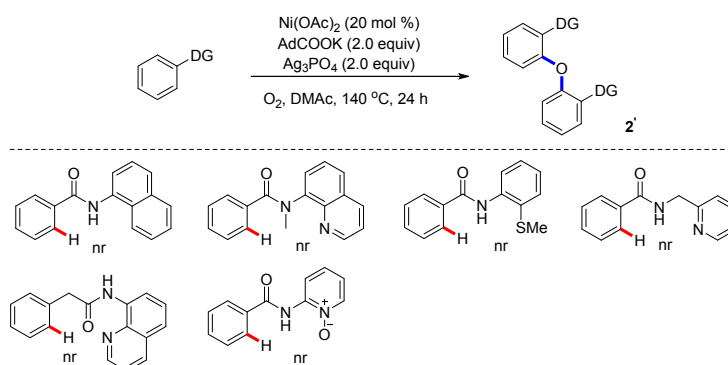

### 2.3. General procedure for the synthesis of symmetrical diaryl ether.

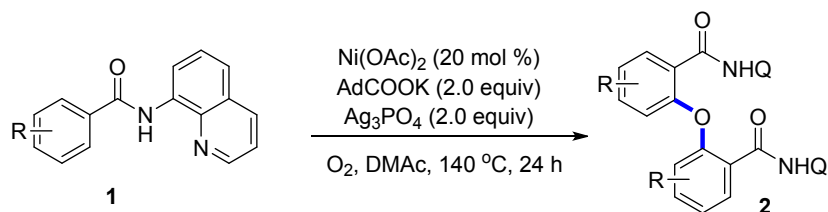

To a 25 mL seal tube with a stir bar was added benzamide (**1**, 0.20 mmol), Ni(OAc)<sub>2</sub> (0.04 mmol, 7.0 mg), Ag<sub>3</sub>PO<sub>4</sub> (0.40 mmol, 166 mg) and AdCOOK (0.40 mmol, 90 mg) in DMAc (2.0 mL), the vial was evacuated and filled with O<sub>2</sub> atmosphere and stirred by oil bath at 140 °C for 24 h, then cooled to room temperature, filtered through a pad of celite, and then washed with EtOAc (10 mL×3), washed by 1 mol/L NaOH solution (20 mL) three times and saturated NaCl (20 mL), then dried with sodium sulfate. Organic solvents were removed under reduced pressure and the crude reaction mixture was purified by column chromatography on silica gel column with EtOAc/petroleum ether (1:10~1:5, v/v) as an eluent to afford the desired product **2**.

### 2.4. Scale-up experiment for the synthesis of symmetrical diaryl ether.

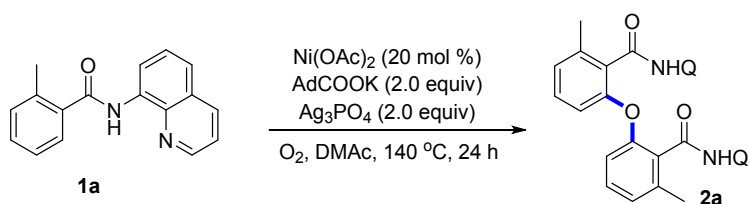

To a 50 mL seal tube with a stir bar was added benzamide (**1a**, 1.0 mmol),  $\text{Ni(OAc)}_2$  (0.20 mmol, 35.0 mg),  $\text{Ag}_3\text{PO}_4$  (2.0 mmol, 830 mg) and AdCOOK (2.0 mmol, 450 mg) in DMAc (10.0 mL), the vial was evacuated and filled with  $\text{O}_2$  atmosphere and stirred by oil bath at 140 °C for 24 h, then cooled to room temperature, filtered through a pad of celite, and then washed with EtOAc (20 mL $\times$ 3), washed by 1 mol/L NaOH solution (30 mL) three times and saturated NaCl (30 mL), then dried with sodium sulfate. Organic solvents were removed under reduced pressure and the crude reaction mixture was purified by column chromatography on silica gel column with EtOAc/petroleum ether (1:10~1:5, v/v) as an eluent to afford the desired product **2a** (yield 82%, 441.2 mg).

### 2.5. General procedure for the synthesis of unsymmetrical diaryl ether.

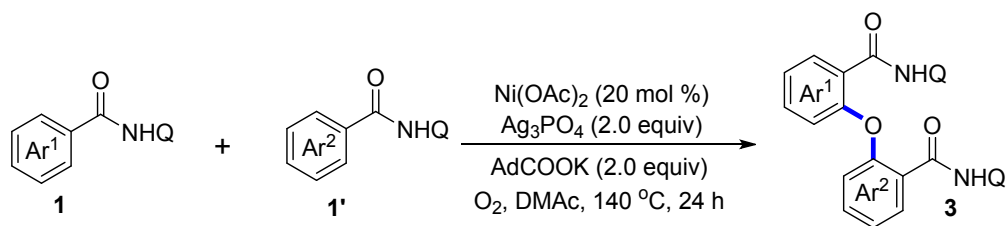

To a 25 mL seal tube with a stir bar was added benzamide (**1**, 0.20 mmol), and another benzamide (**1'**, 0.24 mmol),  $\text{Ni(OAc)}_2$  (0.04 mmol, 7.0 mg),  $\text{Ag}_3\text{PO}_4$  (0.40 mmol, 166 mg) and AdCOOK (0.40 mmol, 90 mg) in DMAc (2.0 mL), the vial was evacuated and filled with  $\text{O}_2$  atmosphere and stirred by oil bath at 140 °C for 24 h, then cooled to room temperature, filtered through a pad of celite, and then washed with EtOAc (10 mL $\times$ 3), washed by 1 mol/L NaOH solution (20 mL) three times and saturated NaCl (20 mL), then dried with sodium sulfate. Organic solvents were removed under reduced pressure and the crude reaction mixture was purified by column chromatography on silica gel column with EtOAc/petroleum ether (1:10~1:5, v/v) and recrystallization to afford the desired product **3**.

## 3. Characterization of the Products

### 6,6'-oxybis(2-methyl-N-(quinolin-8-yl)benzamide) (**2a**)

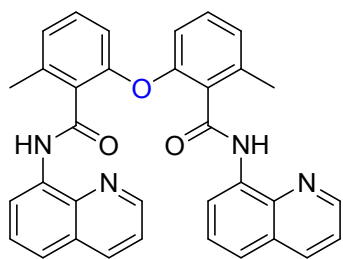

Yield: (38.8 mg, 72%); White solid; mp: >230 °C.  $^1\text{H NMR}$  ( $\text{CDCl}_3$ , 400 MHz)  $\delta$  9.94 (s, 2H), 8.74 (d,  $J = 7.6$  Hz, 2H), 8.10 (dd,  $J_1 = 4.0$  Hz,  $J_2 = 1.2$  Hz, 2H), 7.79 (dd,  $J_1 = 8.0$  Hz,  $J_2 = 1.2$  Hz, 2H), 7.35 (t,  $J = 8.0$  Hz, 2H), 7.28-7.23 (m, 4H), 7.05 (dd,  $J_1 = 8.4$  Hz,  $J_2 = 4.4$  Hz, 2H), 6.99 (d,  $J = 7.6$  Hz, 2H), 6.93 (d,  $J = 8.0$  Hz, 2H), 2.40 (s, 6H).  $^{13}\text{C NMR}$  ( $\text{CDCl}_3$ , 100 MHz)  $\delta$  165.4, 153.8, 147.7, 137.9, 137.8, 135.4, 134.3, 130.4, 129.6, 127.4, 126.9, 125.8, 121.5, 121.1, 116.5, 116.4, 19.5. **HRMS** (ESI-TOF) calcd for  $\text{C}_{34}\text{H}_{27}\text{N}_4\text{O}_3^+$   $[\text{M}+\text{H}]^+$ :539.2078, found:539.2083.

### 2,2'-oxybis(*N*-(quinolin-8-yl)benzamide) (2b)

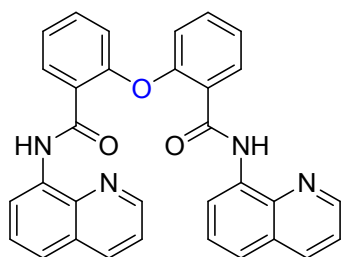

Yield: (33.2 mg, 65%); White solid; mp: 214.4-214.9 °C.  $^1\text{H NMR}$  ( $\text{CDCl}_3$ , 400 MHz)  $\delta$  12.37(s, 2H), 8.96 (dd,  $J_1 = 7.6$  Hz,  $J_2 = 1.2$  Hz, 2H), 8.52 (dd,  $J_1 = 8.0$  Hz,  $J_2 = 1.6$  Hz, 2H), 8.16 (dd,  $J_1 = 4.4$  Hz,  $J_2 = 1.6$  Hz, 2H), 7.92 (d,  $J = 8.4$  Hz, 2H), 7.53-7.48 (m, 4H), 7.40-7.37 (m, 4H), 7.17-7.13 (m, 4H).  $^{13}\text{C NMR}$  ( $\text{CDCl}_3$ , 100 MHz)  $\delta$  162.8, 154.7, 148.1, 138.9, 135.7, 135.3, 133.4, 132.4, 127.8, 127.2, 126.1, 124.8, 121.7, 121.5, 119.8, 116.9. **HRMS** (ESI-TOF) calcd for  $\text{C}_{32}\text{H}_{23}\text{N}_4\text{O}_3^+$   $[\text{M}+\text{H}]^+$ :511.1765, found:511.1770.

### 3,3''-oxybis(*N*-(quinolin-8-yl)-[1,1'-biphenyl]-2-carboxamide) (2c)

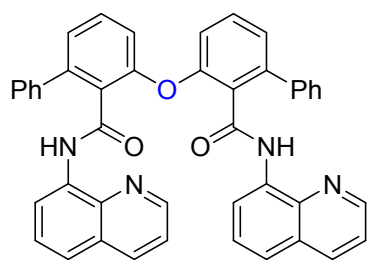

Yield: (40.4 mg, 61%); White solid; mp: >230 °C.  $^1\text{H NMR}$  ( $\text{CDCl}_3$ , 400 MHz)  $\delta$  9.81 (s, 2H), 8.56 (d,  $J = 7.2$  Hz, 2H), 8.11 (s, 2H), 7.77 (d,  $J = 8.0$  Hz, 2H), 7.48-7.43 (m, 6H), 7.24-7.12 (m, 14H), 7.01 (dd,  $J_1 = 7.6$  Hz,  $J_2 = 4.0$  Hz, 2H).  $^{13}\text{C}$

**NMR** (CDCl<sub>3</sub>, 100 MHz)  $\delta$  164.9, 154.4, 147.5, 141.9, 139.6, 137.9, 135.3, 134.3, 130.6, 129.2, 128.5, 128.3, 127.5, 127.3, 126.9, 125.7, 121.3, 120.9, 118.4, 116.5. **HRMS** (ESI-TOF) calcd for C<sub>44</sub>H<sub>31</sub>N<sub>4</sub>O<sub>3</sub><sup>+</sup> [M+H]<sup>+</sup>:663.2391, found:663.2396.

**6,6'-oxybis(2-fluoro-N-(quinolin-8-yl)benzamide) (2d)**

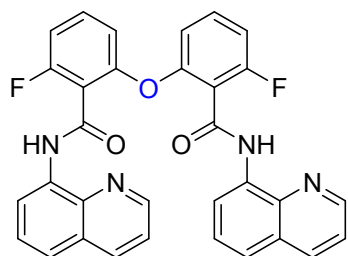

Yield: (30.6 mg, 56%); White solid; mp: 202.5-203.2 °C. **<sup>1</sup>H**

**NMR** (CDCl<sub>3</sub>, 400 MHz)  $\delta$  10.29 (s, 2H), 8.76 (dd,  $J_1 = 7.6$  Hz,  $J_2 = 1.2$  Hz, 2H), 8.26 (dd,  $J_1 = 4.4$  Hz,  $J_2 = 1.6$  Hz, 2H), 7.91 (dd,  $J_1 = 8.4$  Hz,  $J_2 = 1.6$  Hz, 2H), 7.44-7.35 (m, 6H), 7.13 (dd,  $J_1 = 8.4$  Hz,  $J_2 = 4.4$  Hz, 2H), 6.98 (d,  $J = 8.4$  Hz, 2H), 6.93 (d,  $J = 8.4$  Hz, 2H).

**<sup>13</sup>C NMR** (CDCl<sub>3</sub>, 100 MHz)  $\delta$  160.1 (d,  $J_{C-F} = 251.0$  Hz), 159.5, 154.4 (d,  $J_{C-F} = 6.3$  Hz), 147.5, 137.7, 135.2, 133.7, 131.3 (d,  $J_{C-F} = 9.9$  Hz), 127.1, 126.6, 121.5, 120.8, 117.8 (d,  $J_{C-F} = 19.0$  Hz), 116.5, 114.7 (d,  $J_{C-F} = 3.6$  Hz), 111.5 (d,  $J_{C-F} = 21.6$  Hz). **HRMS** (ESI-TOF) calcd for C<sub>32</sub>H<sub>21</sub>F<sub>2</sub>N<sub>4</sub>O<sub>3</sub><sup>+</sup> [M+H]<sup>+</sup>:547.1576, found:547.1578.

**6,6'-oxybis(2-chloro-N-(quinolin-8-yl)benzamide) (2e)**

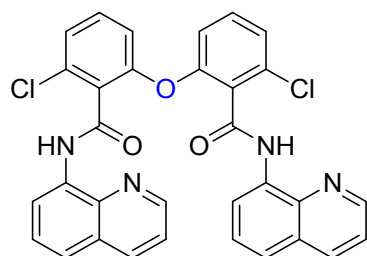

Yield: (26.0 mg, 45%); White solid; mp: 203.4-204.5 °C. **<sup>1</sup>H**

**NMR** (CDCl<sub>3</sub>, 400 MHz)  $\delta$  9.92 (s, 2H), 8.72 (dd,  $J_1 = 7.6$  Hz,  $J_2 = 1.2$  Hz, 2H), 8.19 (dd,  $J_1 = 4.4$  Hz,  $J_2 = 1.6$  Hz, 2H), 7.84 (dd,  $J_1 = 8.4$  Hz,  $J_2 = 1.6$  Hz, 2H), 7.36 (d,  $J = 7.6$  Hz, 2H), 7.31 (d,  $J = 8.4$  Hz, 2H), 7.27 (dd,  $J_1 = 8.0$  Hz,  $J_2 = 1.2$  Hz, 2H), 7.22 (dd,  $J_1 = 8.4$  Hz,  $J_2 = 0.8$  Hz, 2H), 7.10 (dd,  $J_1 = 8.0$  Hz,  $J_2 = 4.0$  Hz, 2H), 7.04 (dd,  $J_1 = 8.0$  Hz,  $J_2 = 0.8$  Hz, 2H). **<sup>13</sup>C NMR** (CDCl<sub>3</sub>, 100 MHz)  $\delta$  162.1, 154.4, 147.8, 137.9, 135.5, 133.9, 132.6, 131.2, 129.4, 127.4, 126.9, 125.5, 121.9, 121.2, 117.6, 116.8. **HRMS** (ESI-TOF) calcd for C<sub>32</sub>H<sub>21</sub>Cl<sub>2</sub>N<sub>4</sub>O<sub>3</sub><sup>+</sup> [M+H]<sup>+</sup>:579.0985, found:579.0988.

**6,6'-oxybis(2-bromo-N-(quinolin-8-yl)benzamide) (2f)**



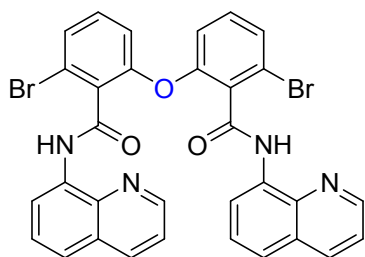

Yield: (28.0 mg, 42%); White solid; mp: 205.0-206.7 °C.  $^1\text{H}$  NMR ( $\text{CDCl}_3$ , 400 MHz)  $\delta$  9.88 (s, 2H), 8.71 (dd,  $J_1 = 7.6$  Hz,  $J_2 = 1.2$  Hz, 2H), 8.19 (dd,  $J_1 = 4.4$  Hz,  $J_2 = 1.6$  Hz, 2H), 7.83 (dd,  $J_1 = 8.4$  Hz,  $J_2 = 1.6$  Hz, 2H), 7.39 (dd,  $J_1 = 8.0$  Hz,  $J_2 = 0.8$  Hz, 2H), 7.34 (t,  $J = 8.0$  Hz, 2H), 7.28-7.24 (m, 4H), 7.11-7.08 (m, 4H).  $^{13}\text{C}$  NMR ( $\text{CDCl}_3$ , 100 MHz)  $\delta$  163.1, 154.3, 147.8, 137.9, 135.5, 133.9, 131.5, 128.6, 127.4, 126.9, 121.9, 121.2, 120.9, 118.2, 116.8. HRMS (ESI-TOF) calcd for  $\text{C}_{32}\text{H}_{21}\text{Br}_2\text{N}_4\text{O}_3^+$   $[\text{M}+\text{H}]^+$ :666.9975, found:666.9978.

**6,6'-oxybis(*N*-(quinolin-8-yl)-2-(trifluoromethyl)benzamide) (2g)**

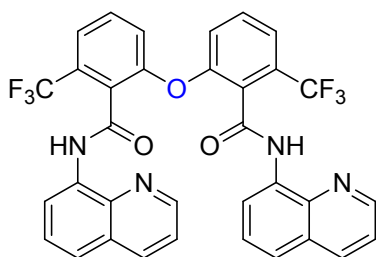

Yield: (29.1 mg, 45%); White solid; mp: 169.9-171.0 °C.  $^1\text{H}$  NMR ( $\text{CDCl}_3$ , 400 MHz)  $\delta$  9.91 (s, 2H), 8.69 (dd,  $J_1 = 7.6$  Hz,  $J_2 = 1.2$  Hz, 2H), 8.11 (dd,  $J_1 = 4.4$  Hz,  $J_2 = 1.6$  Hz, 2H), 7.83 (dd,  $J_1 = 8.0$  Hz,  $J_2 = 1.6$  Hz, 2H), 7.54-7.51 (m, 4H), 7.36-7.32 (m, 4H), 7.26 (dd,  $J_1 = 8.4$  Hz,  $J_2 = 1.2$  Hz, 2H), 7.06 (dd,  $J_1 = 8.0$  Hz,  $J_2 = 4.0$  Hz, 2H).  $^{13}\text{C}$  NMR ( $\text{CDCl}_3$ , 100 MHz)  $\delta$  162.2, 154.2, 147.7, 137.8, 135.5, 133.9, 131.1, 129.3 (q,  $J_{\text{C-F}} = 32.5$  Hz), 128.3 (q,  $J_{\text{C-F}} = 2.7$  Hz), 127.3, 126.9, 122.9, 122.8 (q,  $J_{\text{C-F}} = 330.4$  Hz), 122.1 (q,  $J_{\text{C-F}} = 4.5$  Hz), 122.0, 121.2, 116.8. HRMS (ESI-TOF) calcd for  $\text{C}_{34}\text{H}_{21}\text{F}_6\text{N}_4\text{O}_3^+$   $[\text{M}+\text{H}]^+$ :647.1512, found:647.1516.

**6,6'-oxybis(3-methoxy-2-methyl-*N*-(quinolin-8-yl)benzamide) (2h)**

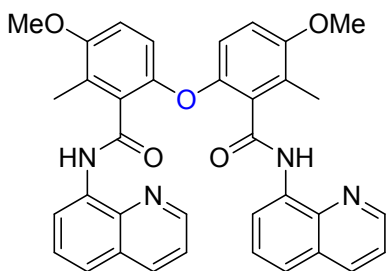

Yield: (28.8 mg, 48%); White solid; mp: 197.8-198.1 °C.  $^1\text{H}$  NMR ( $\text{CDCl}_3$ , 400 MHz)  $\delta$  9.85 (s, 2H), 8.74 (dd,  $J_1 = 7.6$  Hz,  $J_2 = 0.8$  Hz, 2H), 8.13 (dd,

$J_1 = 4.0$  Hz,  $J_2 = 1.6$  Hz, 2H), 7.81 (dd,  $J_1 = 8.0$  Hz,  $J_2 = 1.2$  Hz, 2H), 7.33 (t,  $J = 8.0$  Hz, 2H), 7.23 (dd,  $J_1 = 8.4$  Hz,  $J_2 = 1.2$  Hz, 2H), 7.06 (dd,  $J_1 = 8.0$  Hz,  $J_2 = 4.4$  Hz, 2H), 6.89 (d,  $J = 9.2$  Hz, 2H), 6.82 (d,  $J = 8.0$  Hz, 2H), 3.80 (s, 6H), 2.22 (s, 6H).  $^{13}\text{C}$  NMR ( $\text{CDCl}_3$ , 100 MHz)  $\delta$  165.4, 153.8, 147.7, 147.6, 137.9, 135.4, 134.3, 130.9, 127.3, 126.9, 125.8, 121.4, 121.1, 116.7, 116.5, 111.9, 56.0, 12.9. HRMS (ESI-TOF) calcd for  $\text{C}_{36}\text{H}_{31}\text{N}_4\text{O}_5^+$   $[\text{M}+\text{H}]^+$ :599.2289, found:599.2292.

**6,6'-oxybis(3-chloro-2-methyl-*N*-(quinolin-8-yl)benzamide) (2i)**

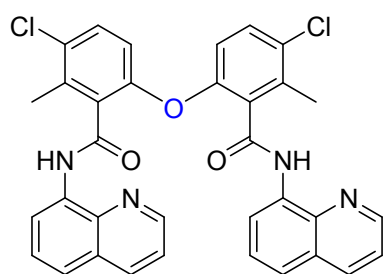

Yield: (33.9 mg, 56%); White solid; mp: >230 °C.  $^1\text{H}$  NMR ( $\text{CDCl}_3$ , 400 MHz)  $\delta$  9.83 (s, 2H), 8.69 (dd,  $J_1 = 7.6$  Hz,  $J_2 = 1.2$  Hz, 2H), 8.17 (dd,  $J_1 = 4.0$  Hz,  $J_2 = 1.6$  Hz, 2H), 7.84 (dd,  $J_1 = 8.0$  Hz,  $J_2 = 1.2$  Hz, 2H), 7.37 (d,  $J = 8.8$  Hz, 2H), 7.33 (t,  $J = 8.0$  Hz, 2H), 7.25 (dd,  $J_1 = 8.0$  Hz,  $J_2 = 1.2$  Hz, 2H), 7.11 (dd,  $J_1 = 8.0$  Hz,  $J_2 = 4.0$  Hz, 2H), 6.89 (d,  $J = 8.8$  Hz, 2H), 2.38 (s, 6H).  $^{13}\text{C}$  NMR ( $\text{CDCl}_3$ , 100 MHz)  $\delta$  164.3, 151.9, 147.8, 137.8, 135.5, 135.4, 133.9, 131.4, 130.9, 130.2, 127.4, 126.9, 121.8, 121.2, 117.6, 116.6, 17.3. HRMS (ESI-TOF) calcd for  $\text{C}_{34}\text{H}_{25}\text{Cl}_2\text{N}_4\text{O}_3^+$   $[\text{M}+\text{H}]^+$ :607.1298, found:607.1301.

**6,6'-oxybis(3-bromo-2-methyl-*N*-(quinolin-8-yl)benzamide) (2j)**

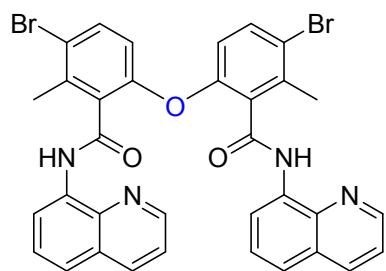

Yield: (36.1 mg, 52%); White solid; mp: >230 °C.  $^1\text{H}$  NMR ( $\text{CDCl}_3$ , 400 MHz)  $\delta$  9.82 (s, 2H), 8.68 (d,  $J = 7.6$  Hz, 2H), 8.17 (d,  $J = 2.8$  Hz, 2H), 7.83 (d,  $J = 8.0$  Hz, 2H), 7.55 (d,  $J = 8.4$  Hz, 2H), 7.31 (d,  $J = 8.0$  Hz, 2H), 7.25 (t,  $J = 8.4$  Hz, 2H), 7.11 (dd,  $J_1 = 8.0$  Hz,  $J_2 = 4.0$  Hz, 2H), 6.83 (d,  $J = 8.8$  Hz, 2H), 2.40 (s, 6H).  $^{13}\text{C}$  NMR ( $\text{CDCl}_3$ , 100 MHz)  $\delta$  164.4, 152.5, 147.8, 137.8, 137.0, 135.5, 134.2, 133.9, 131.4, 127.3, 126.9, 121.9, 121.2, 120.3, 117.9, 116.6, 20.3. HRMS (ESI-TOF) calcd for

$C_{34}H_{25}Br_2N_4O_3^+$   $[M+H]^+$ :695.0288, found:695.0289.

**6,6'-oxybis(2,4-dimethyl-*N*-(quinolin-8-yl)benzamide) (2k)**

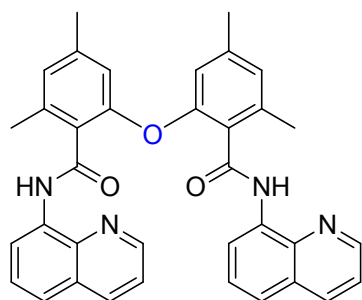

Yield: (31.2 mg, 55%); White solid; mp: >230 °C.  $^1H$  NMR

( $CDCl_3$ , 400 MHz)  $\delta$  9.99 (s, 2H), 8.78 (d,  $J = 7.2$  Hz, 2H), 8.08 (dd,  $J_1 = 4.4$  Hz,  $J_2 = 1.6$  Hz, 2H), 7.83 (dd,  $J_1 = 8.4$  Hz,  $J_2 = 1.6$  Hz, 2H), 7.40 (t,  $J = 8.0$  Hz, 2H), 7.28 (dd,  $J_1 = 8.0$  Hz,  $J_2 = 0.8$  Hz, 2H), 7.05 (dd,  $J_1 = 8.4$  Hz,  $J_2 = 4.4$  Hz, 2H), 6.82 (s, 2H), 6.74 (s, 2H), 2.38 (s, 6H), 2.29 (s, 6H).  $^{13}C$  NMR ( $CDCl_3$ , 100 MHz)  $\delta$  165.6, 154.1, 147.6, 140.8, 138.0, 137.6, 135.4, 134.5, 127.4, 127.0, 126.8, 126.7, 121.4, 121.1, 117.2, 116.5, 21.4, 19.6.

**HRMS** (ESI-TOF) calcd for  $C_{36}H_{31}N_4O_3^+$   $[M+H]^+$ :567.2391, found:567.2390.

**6,6'-oxybis(4-methoxy-2-methyl-*N*-(quinolin-8-yl)benzamide) (2l)**

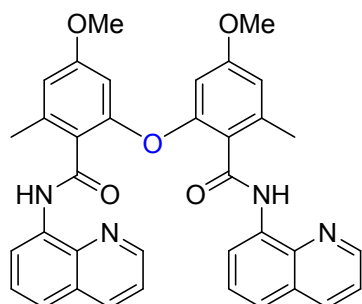

Yield: (36.5 mg, 61%); White solid; mp: 185.5-186.4 °C.  $^1H$  NMR

( $CDCl_3$ , 400 MHz)  $\delta$  10.04 (s, 2H), 8.76 (d,  $J = 7.6$  Hz, 2H), 8.11 (d,  $J = 2.8$  Hz, 2H), 7.83 (dd,  $J_1 = 8.4$  Hz,  $J_2 = 1.6$  Hz, 2H), 7.40 (t,  $J = 7.6$  Hz, 2H), 7.28 (d,  $J = 7.2$  Hz, 2H), 7.07 (dd,  $J_1 = 8.4$  Hz,  $J_2 = 4.4$  Hz, 2H), 6.55 (d,  $J = 2.0$  Hz, 2H), 6.47 (d,  $J = 2.4$  Hz, 2H), 3.80 (s, 6H), 2.40 (s, 6H).  $^{13}C$  NMR ( $CDCl_3$ , 100 MHz)  $\delta$  165.2, 161.0, 155.1, 147.7, 139.6, 138.1, 135.4, 134.6, 127.5, 127.0, 122.3, 121.4, 121.1, 116.5, 112.0, 102.3, 55.5, 20.2.

**HRMS** (ESI-TOF) calcd for  $C_{36}H_{31}N_4O_5^+$   $[M+H]^+$ : 599.2289, found:599.2291.

**6,6'-oxybis(4-fluoro-2-methyl-*N*-(quinolin-8-yl)benzamide) (2m)**

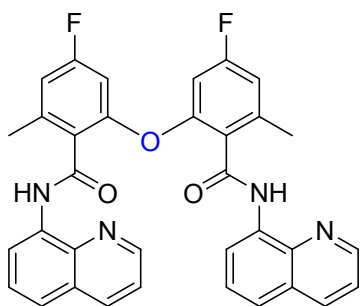

Yield: (30.0 mg, 52%); White solid; mp: 144.4-144.7 °C. **<sup>1</sup>H NMR** (CDCl<sub>3</sub>, 400 MHz) δ 9.92 (s, 2H), 8.71 (dd,  $J_1 = 7.6$  Hz,  $J_2 = 0.8$  Hz, 2H), 8.19 (dd,  $J_1 = 4.4$  Hz,  $J_2 = 1.6$  Hz, 2H), 7.86 (dd,  $J_1 = 8.0$  Hz,  $J_2 = 1.6$  Hz, 2H), 7.37 (t,  $J = 8.0$  Hz, 2H), 7.29 (dd,  $J_1 = 8.4$  Hz,  $J_2 = 1.2$  Hz, 2H), 7.12 (dd,  $J_1 = 8.0$  Hz,  $J_2 = 4.0$  Hz, 2H), 6.76 (dd,  $J_1 = 9.2$  Hz,  $J_2 = 2.4$  Hz, 2H), 6.69 (dd,  $J_1 = 9.6$  Hz,  $J_2 = 2.0$  Hz, 2H), 2.39 (s, 6H). **<sup>13</sup>C NMR** (CDCl<sub>3</sub>, 100 MHz) δ 164.3, 163.2 (d,  $J_{C-F} = 248.3$  Hz), 154.5 (d,  $J_{C-F} = 10.8$  Hz), 147.8, 140.3 (d,  $J_{C-F} = 9.0$  Hz), 137.9, 135.5, 134.1, 127.4, 127.0, 125.9 (d,  $J_{C-F} = 3.6$  Hz), 121.7, 121.2, 116.6, 113.3 (d,  $J_{C-F} = 21.6$  Hz), 104.4 (d,  $J_{C-F} = 25.2$  Hz), 19.7. **HRMS** (ESI-TOF) calcd for C<sub>34</sub>H<sub>25</sub>F<sub>2</sub>N<sub>4</sub>O<sub>3</sub><sup>+</sup> [M+H]<sup>+</sup>:575.1889, found:575.1894.

**6,6'-oxybis(4-bromo-2-methyl-N-(quinolin-8-yl)benzamide) (2n)**

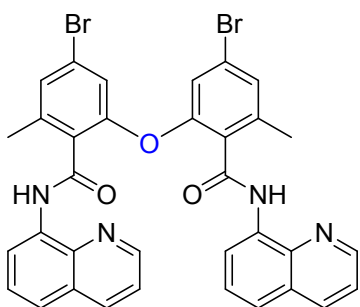

Yield: (41.7 mg, 60%); White solid; mp: 162.6-164.2 °C. **<sup>1</sup>H NMR** (CDCl<sub>3</sub>, 400 MHz) δ 9.94 (s, 2H), 8.73 (d,  $J = 7.2$  Hz, 2H), 8.21 (s, 2H), 7.88 (d,  $J = 8.0$  Hz, 2H), 7.39 (t,  $J = 8.0$  Hz, 2H), 7.31 (d,  $J = 8.0$  Hz, 2H), 7.18 (s, 2H), 7.14-7.09 (m, 4H), 2.37 (s, 6H). **<sup>13</sup>C NMR** (CDCl<sub>3</sub>, 100 MHz) δ 164.1, 153.8, 147.9, 139.7, 137.9, 135.6, 134.1, 129.3, 128.6, 127.4, 127.0, 123.7, 121.8, 121.3, 119.8, 116.6, 19.4. **HRMS** (ESI-TOF) calcd for C<sub>34</sub>H<sub>25</sub>Br<sub>2</sub>N<sub>4</sub>O<sub>3</sub><sup>+</sup> [M+H]<sup>+</sup>:695.0288, found:695.0293.

**6,6'-oxybis(5-fluoro-2-methyl-N-(quinolin-8-yl)benzamide) (2o)**

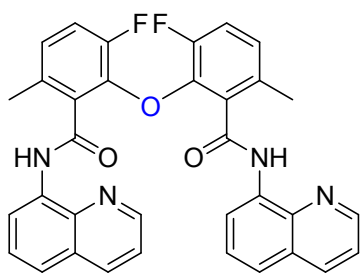

Yield: (23.0 mg, 40%); White solid; mp: 171.2-172.8 °C. **<sup>1</sup>H NMR** (CDCl<sub>3</sub>, 400 MHz) δ 10.17 (s, 2H), 8.81 (dd,  $J_1 = 7.6$  Hz,  $J_2 = 0.8$  Hz, 2H), 8.32 (dd,  $J_1 = 4.0$  Hz,  $J_2 = 1.6$  Hz, 2H), 7.98 (dd,  $J_1 = 8.0$  Hz,  $J_2 = 1.6$  Hz, 2H), 7.46 (t,  $J = 7.6$  Hz, 2H), 7.42 (dd,  $J_1 = 8.0$  Hz,  $J_2 = 1.2$  Hz, 2H), 7.22 (dd,  $J_1 = 8.0$  Hz,  $J_2 = 4.0$  Hz, 2H), 7.01 (dd,  $J_1 = 11.2$  Hz,  $J_2 = 8.8$  Hz, 2H), 6.91 (d,  $J = 4.4$  Hz, 2H), 2.36 (s, 6H). **<sup>13</sup>C NMR** (CDCl<sub>3</sub>, 100 MHz) δ 163.9 (d,  $J_{C-F} = 2.7$  Hz), 151.8 (d,  $J_{C-F} = 247.4$  Hz), 147.9, 141.6 (d,  $J_{C-F} = 9.0$  Hz), 138.3, 135.8, 134.4, 132.9 (d,  $J_{C-F} = 3.6$  Hz), 130.4, 127.7, 127.1, 126.3 (d,  $J_{C-F} = 7.2$  Hz), 121.9, 121.4, 117.3 (d,  $J_{C-F} = 18.1$  Hz), 116.9, 19.1. **HRMS** (ESI-TOF) calcd for C<sub>34</sub>H<sub>25</sub>F<sub>2</sub>N<sub>4</sub>O<sub>3</sub><sup>+</sup> [M+H]<sup>+</sup>:575.1889, found:575.1888.

**6,6'-oxybis(2,3-dichloro-N-(quinolin-8-yl)benzamide) (2p)**

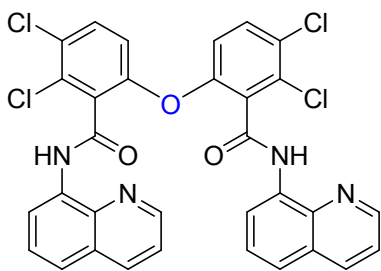

Yield: (29.1 mg, 45%); White solid; mp: 170.5-171.2 °C. **<sup>1</sup>H NMR** (CDCl<sub>3</sub>, 400 MHz) δ 9.93 (s, 2H), 8.69 (dd,  $J_1 = 7.6$  Hz,  $J_2 = 1.2$  Hz, 2H), 8.25 (dd,  $J_1 = 4.4$  Hz,  $J_2 = 1.6$  Hz, 2H), 7.88 (dd,  $J_1 = 8.4$  Hz,  $J_2 = 1.6$  Hz, 2H), 7.47 (d,  $J = 8.8$  Hz, 2H), 7.36 (t,  $J = 8.0$  Hz, 2H), 7.30 (dd,  $J_1 = 8.4$  Hz,  $J_2 = 1.6$  Hz, 2H), 7.15 (dd,  $J_1 = 8.4$  Hz,  $J_2 = 4.0$  Hz, 2H), 7.02 (d,  $J = 8.8$  Hz, 2H). **<sup>13</sup>C NMR** (CDCl<sub>3</sub>, 100 MHz) δ 161.2, 152.3, 147.9, 137.9, 135.7, 133.6, 131.7, 131.0, 131.0, 129.2, 127.4, 126.9, 122.2, 121.3, 118.7, 116.9. **HRMS** (ESI-TOF) calcd for C<sub>32</sub>H<sub>19</sub>Cl<sub>4</sub>N<sub>4</sub>O<sub>3</sub><sup>+</sup> [M+H]<sup>+</sup>:647.0206, found: 647.0215.

**6,6'-oxybis(2-fluoro-4-methoxy-N-(quinolin-8-yl)benzamide) (2q)**

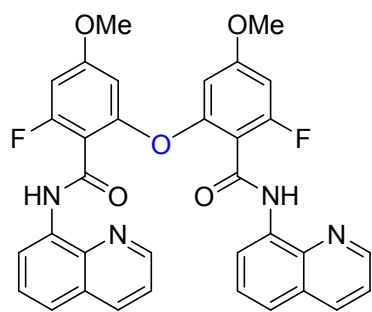

Yield: (23.1 mg, 38%); White solid; mp: >230 °C. **<sup>1</sup>H NMR** (CDCl<sub>3</sub>, 400 MHz) δ 10.48 (s, 2H), 8.80 (d, *J* = 7.6 Hz, 2H), 8.30 (dd, *J*<sub>1</sub> = 4.4 Hz, *J*<sub>2</sub> = 1.6 Hz, 2H), 7.93 (dd, *J*<sub>1</sub> = 8.4 Hz, *J*<sub>2</sub> = 1.6 Hz, 2H), 7.46 (t, *J* = 8.0 Hz, 2H), 7.38 (dd, *J*<sub>1</sub> = 8.4 Hz, *J*<sub>2</sub> = 1.2 Hz, 2H), 7.14 (dd, *J*<sub>1</sub> = 8.4 Hz, *J*<sub>2</sub> = 4.4 Hz, 2H), 6.53 (dd, *J*<sub>1</sub> = 11.6 Hz, *J*<sub>2</sub> = 2.4 Hz, 2H), 6.46 (d, *J* = 1.6 Hz, 2H), 3.77 (s, 6H). **<sup>13</sup>C NMR** (CDCl<sub>3</sub>, 100 MHz) δ 162.4 (d, *J*<sub>C-F</sub> = 13.5 Hz), 162.1 (d, *J*<sub>C-F</sub> = 250.1 Hz), 155.8 (d, *J*<sub>C-F</sub> = 9.0 Hz), 147.9, 138.4, 135.7, 134.5, 127.7, 127.1, 121.8, 121.3, 117.0, 110.8 (d, *J*<sub>C-F</sub> = 17.1 Hz), 101.7 (d, *J*<sub>C-F</sub> = 3.6 Hz), 98.6 (d, *J*<sub>C-F</sub> = 26.2 Hz), 55.9. **HRMS** (ESI-TOF) calcd for C<sub>34</sub>H<sub>25</sub>F<sub>2</sub>N<sub>4</sub>O<sub>5</sub><sup>+</sup> [M+H]<sup>+</sup>:607.1788, found:607.1793.

### 2,2'-oxybis(4-methyl-*N*-(quinolin-8-yl)benzamide) (2r)

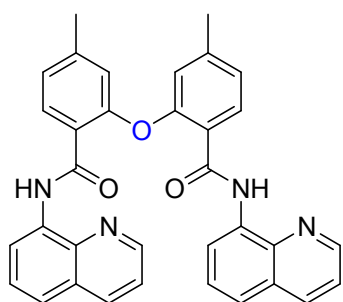

Yield: (24.3 mg, 45%); White solid; mp: >230 °C. **<sup>1</sup>H NMR** (CDCl<sub>3</sub>, 400 MHz) δ 12.42 (s, 2H), 8.98 (d, *J* = 7.6 Hz, 2H), 8.42 (d, *J* = 8.0 Hz, 2H), 8.18 (d, *J* = 3.2 Hz, 2H), 7.89 (t, *J* = 8.0 Hz, 2H), 7.50 (t, *J* = 8.0 Hz, 2H), 7.36 (d, *J* = 8.4 Hz, 2H), 7.18 (d, *J* = 8.0 Hz, 2H), 7.13 (dd, *J*<sub>1</sub> = 8.0 Hz, *J*<sub>2</sub> = 4.0 Hz, 2H), 6.91 (s, 2H), 2.33 (s, 6H). **<sup>13</sup>C NMR** (CDCl<sub>3</sub>, 100 MHz) δ 162.9, 154.7, 148.0, 144.6, 138.9, 135.7, 135.4, 132.2, 127.8, 127.2, 125.8, 123.3, 121.5, 120.2, 116.8, 21.5. **HRMS** (ESI-TOF) calcd for C<sub>34</sub>H<sub>27</sub>N<sub>4</sub>O<sub>3</sub><sup>+</sup> [M+H]<sup>+</sup>:539.2078, found:539.2079.

### 2,2'-oxybis(4-(*tert*-butyl)-*N*-(quinolin-8-yl)benzamide) (2s)

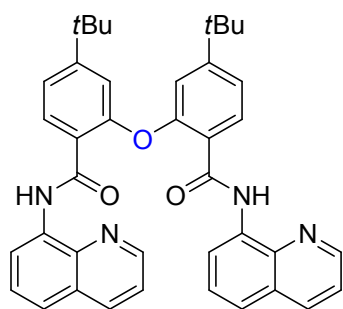

Yield: (32.4 mg, 52%); White solid; mp: >230 °C. <sup>1</sup>H NMR (CDCl<sub>3</sub>, 400 MHz) δ 12.35 (s, 2H), 8.97 (dd,  $J_1 = 7.6$  Hz,  $J_2 = 0.8$  Hz, 2H), 8.46 (d,  $J = 8.4$  Hz, 2H), 8.19 (dd,  $J_1 = 4.0$  Hz,  $J_2 = 1.6$  Hz, 2H), 7.88 (dd,  $J_1 = 8.0$  Hz,  $J_2 = 1.6$  Hz, 2H), 7.48 (t,  $J = 8.0$  Hz, 2H), 7.39 (dd,  $J_1 = 8.0$  Hz,  $J_2 = 1.6$  Hz, 2H), 7.34 (dd,  $J_1 = 8.0$  Hz,  $J_2 = 0.8$  Hz, 2H), 7.13 (t,  $J = 4.0$  Hz, 2H), 7.11 (d,  $J = 1.6$  Hz, 2H), 1.25 (s, 18H). <sup>13</sup>C NMR (CDCl<sub>3</sub>, 100 MHz) δ 163.0, 157.5, 154.6, 148.0, 138.9, 135.6, 135.5, 132.2, 127.7, 127.1, 123.1, 121.6, 121.5, 116.7, 116.6, 35.2, 31.0. HRMS (ESI-TOF) calcd for C<sub>40</sub>H<sub>39</sub>N<sub>4</sub>O<sub>3</sub><sup>+</sup> [M+H]<sup>+</sup>:623.3017, found:623.3018.

### 3,3'-oxybis(*N*-(quinolin-8-yl)-[1,1'-biphenyl]-4-carboxamide) (2t)

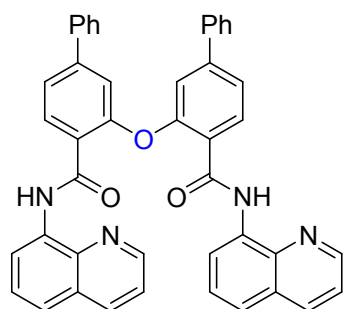

Yield: (27.9 mg, 42%); White solid; mp: 204.0-205.0 °C. <sup>1</sup>H NMR (CDCl<sub>3</sub>, 400 MHz) δ 12.45 (s, 2H), 9.00 (dd,  $J_1 = 7.6$  Hz,  $J_2 = 1.2$  Hz, 2H), 8.59 (d,  $J = 8.0$  Hz, 2H), 8.22 (dd,  $J_1 = 4.0$  Hz,  $J_2 = 1.6$  Hz, 2H), 7.93 (dd,  $J_1 = 8.4$  Hz,  $J_2 = 1.6$  Hz, 2H), 7.64 (dd,  $J_1 = 8.0$  Hz,  $J_2 = 1.6$  Hz, 2H), 7.54-7.50 (m, 6H), 7.41-7.33 (m, 10H), 7.16 (dd,  $J_1 = 8.4$  Hz,  $J_2 = 4.4$  Hz, 2H). <sup>13</sup>C NMR (CDCl<sub>3</sub>, 100 MHz) δ 162.7, 155.0, 148.1, 146.6, 138.9, 138.8, 135.7, 135.3, 133.0, 128.9, 128.5, 127.8, 127.2, 124.7, 123.5, 121.7, 121.6, 118.1, 116.9. HRMS (ESI-TOF) calcd for C<sub>44</sub>H<sub>31</sub>N<sub>4</sub>O<sub>3</sub><sup>+</sup> [M+H]<sup>+</sup>:663.2391, found:663.2394.

### (2,2'-oxybis(4-methoxy-*N*-(quinolin-8-yl)benzamide) (2u)

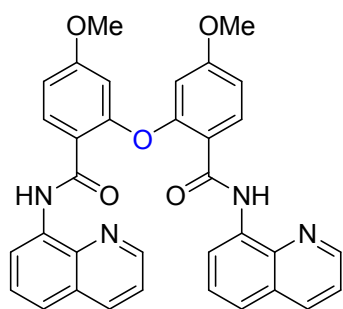

Yield: (28.0 mg, 49%); White solid; mp: 205.2-205.4 °C. **<sup>1</sup>H NMR** (CDCl<sub>3</sub>, 400 MHz) δ 12.32 (s, 2H), 8.96 (dd,  $J_1 = 7.6$  Hz,  $J_2 = 0.8$  Hz, 2H), 8.48 (d,  $J = 9.2$  Hz, 2H), 8.21 (dd,  $J_1 = 4.4$  Hz,  $J_2 = 1.6$  Hz, 2H), 7.91 (dd,  $J_1 = 8.4$  Hz,  $J_2 = 1.6$  Hz, 2H), 7.50 (t,  $J = 8.0$  Hz, 2H), 7.36 (dd,  $J_1 = 8.4$  Hz,  $J_2 = 1.2$  Hz, 2H), 7.14 (dd,  $J_1 = 8.0$  Hz,  $J_2 = 4.0$  Hz, 2H), 6.91 (dd,  $J_1 = 8.8$  Hz,  $J_2 = 2.4$  Hz, 2H), 6.61 (d,  $J = 2.4$  Hz, 2H), 3.77 (s, 6H). **<sup>13</sup>C NMR** (CDCl<sub>3</sub>, 100 MHz) δ 163.6, 162.7, 155.8, 148.0, 138.9, 135.7, 135.5, 133.8, 127.8, 127.2, 121.5, 121.4, 118.7, 116.7, 110.7, 105.3, 55.8. **HRMS** (ESI-TOF) calcd for C<sub>34</sub>H<sub>27</sub>N<sub>4</sub>O<sub>5</sub><sup>+</sup> [M+H]<sup>+</sup>:571.1976, found:571.1980.

**dimethyl 3,3'-oxybis(4-(quinolin-8-ylcarbamoyl)benzoate) (2v)**

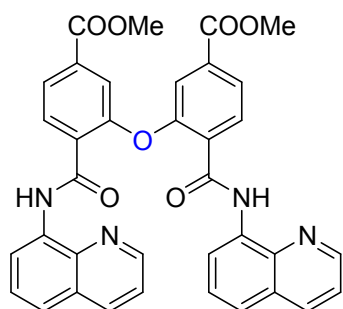

Yield: (21.6 mg, 35%); White solid; mp: 208.9-209.8 °C. **<sup>1</sup>H NMR** (CDCl<sub>3</sub>, 400 MHz) δ 12.31 (s, 2H), 8.95 (dd,  $J_1 = 7.6$  Hz,  $J_2 = 1.2$  Hz, 2H), 8.61 (d,  $J = 8.4$  Hz, 2H), 8.14 (dd,  $J_1 = 4.4$  Hz,  $J_2 = 1.6$  Hz, 2H), 8.08 (dd,  $J_1 = 8.4$  Hz,  $J_2 = 1.2$  Hz, 2H), 7.95 (dd,  $J_1 = 8.4$  Hz,  $J_2 = 1.6$  Hz, 2H), 7.76 (d,  $J = 1.2$  Hz, 2H), 7.52 (t,  $J = 8.0$  Hz, 2H), 7.42 (dd,  $J_1 = 8.0$  Hz,  $J_2 = 0.8$  Hz, 2H), 7.17 (dd,  $J_1 = 8.4$  Hz,  $J_2 = 4.4$  Hz, 2H), 3.87 (s, 6H). **<sup>13</sup>C NMR** (CDCl<sub>3</sub>, 100 MHz) δ 165.4, 161.6, 154.2, 148.2, 138.8, 135.9, 134.9, 134.8, 132.9, 129.9, 127.8, 127.2, 125.9, 122.2, 121.6, 120.7, 117.1, 52.6. **HRMS** (ESI-TOF) calcd for C<sub>36</sub>H<sub>27</sub>N<sub>4</sub>O<sub>7</sub><sup>+</sup> [M+H]<sup>+</sup>:627.1874, found:627.1883.

**6,6'-oxybis(3-methyl-N-(quinolin-8-yl)benzamide) (2w)**



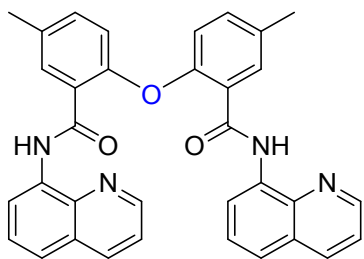

Yield: (34.0 mg, 63%); White solid; mp: 201.1-202.7 °C.  $^1\text{H}$  NMR ( $\text{CDCl}_3$ , 400 MHz)  $\delta$  12.41 (s, 2H), 8.96 (d,  $J = 7.6$  Hz, 2H), 8.30 (s, 2H), 8.19 (d,  $J = 2.4$  Hz, 2H), 7.92 (d,  $J = 8.0$  Hz, 2H), 7.51 (t,  $J = 8.0$  Hz, 2H), 7.38 (d,  $J = 8.0$  Hz, 2H), 7.28 (d,  $J = 8.0$  Hz, 2H), 7.14 (dd,  $J_1 = 8.0$  Hz,  $J_2 = 4.0$  Hz, 2H), 7.01 (d,  $J = 8.0$  Hz, 2H), 2.45 (s, 6H).  $^{13}\text{C}$  NMR ( $\text{CDCl}_3$ , 100 MHz)  $\delta$  163.1, 152.8, 148.1, 139.0, 135.7, 135.4, 134.3, 133.9, 132.5, 127.8, 127.2, 125.5, 121.6, 121.5, 119.6, 116.9, 20.8. HRMS (ESI-TOF) calcd for  $\text{C}_{34}\text{H}_{27}\text{N}_4\text{O}_3^+$   $[\text{M}+\text{H}]^+$ :539.2078, found:539.2080.

#### 4,4'-oxybis(*N*-(quinolin-8-yl)-[1,1'-biphenyl]-3-carboxamide) (2x)

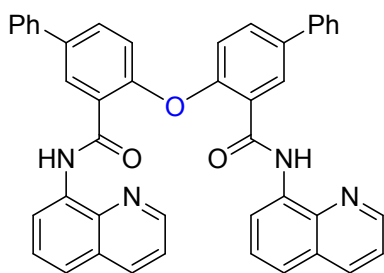

Yield: (29.8 mg, 45%); White solid; mp: >230 °C.  $^1\text{H}$  NMR ( $\text{CDCl}_3$ , 400 MHz)  $\delta$  12.43 (s, 2H), 8.99 (dd,  $J_1 = 7.6$  Hz,  $J_2 = 0.8$  Hz, 2H), 8.79 (d,  $J = 2.4$  Hz, 2H), 8.22 (dd,  $J_1 = 4.0$  Hz,  $J_2 = 1.6$  Hz, 2H), 7.93 (dd,  $J_1 = 8.4$  Hz,  $J_2 = 1.6$  Hz, 2H), 7.76 (dd,  $J_1 = 8.4$  Hz,  $J_2 = 2.4$  Hz, 2H), 7.71 (d,  $J = 7.6$  Hz, 4H), 7.54-7.47 (m, 6H), 7.41-7.37 (m, 4H), 7.27 (d,  $J = 8.8$  Hz, 2H), 7.16 (dd,  $J_1 = 8.4$  Hz,  $J_2 = 4.0$  Hz, 2H).  $^{13}\text{C}$  NMR ( $\text{CDCl}_3$ , 100 MHz)  $\delta$  162.7, 154.0, 148.2, 139.4, 138.9, 137.9, 135.8, 135.3, 131.7, 130.9, 129.0, 127.8, 127.7, 127.2, 127.1, 126.3, 121.8, 121.6, 120.2, 116.9. HRMS (ESI-TOF) calcd for  $\text{C}_{44}\text{H}_{31}\text{N}_4\text{O}_3^+$   $[\text{M}+\text{H}]^+$ :663.2391, found:663.2394.

#### 6,6'-oxybis(3-methoxy-*N*-(quinolin-8-yl)benzamide) (2y)

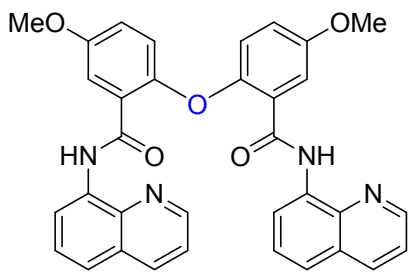

Yield: (24.0 mg, 42%); White solid; mp: 228.0-229.2 °C.  $^1\text{H}$  NMR ( $\text{CDCl}_3$ , 400 MHz)  $\delta$  12.50 (s, 2H), 8.97 (dd,  $J_1 = 7.6$  Hz,  $J_2 = 1.2$  Hz, 2H), 8.21

(dd,  $J_1 = 4.4$  Hz,  $J_2 = 2.0$  Hz, 2H), 8.01 (t,  $J = 1.6$  Hz, 2H), 7.93 (dd,  $J_1 = 8.0$  Hz,  $J_2 = 1.6$  Hz, 2H), 7.51 (t,  $J = 8.0$  Hz, 2H), 7.39 (dd,  $J_1 = 8.4$  Hz,  $J_2 = 1.2$  Hz, 2H), 7.16 (dd,  $J_1 = 8.0$  Hz,  $J_2 = 4.0$  Hz, 2H), 7.04 (d,  $J = 1.2$  Hz, 4H), 3.92 (s, 6H).  $^{13}\text{C}$  NMR ( $\text{CDCl}_3$ , 100 MHz)  $\delta$  162.7, 156.2, 148.8, 148.1, 138.9, 135.7, 135.3, 127.8, 127.2, 126.4, 121.7, 121.5, 120.9, 120.3, 116.9, 115.0, 55.9. HRMS (ESI-TOF) calcd for  $\text{C}_{34}\text{H}_{27}\text{N}_4\text{O}_5^+$   $[\text{M}+\text{H}]^+$ :571.1976, found:571.1981.

#### 6,6'-oxybis(3-fluoro-*N*-(quinolin-8-yl)benzamide) (2z)

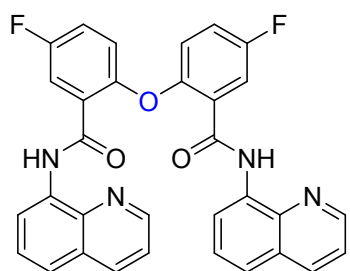

Yield: (25.2 mg, 46%); White solid; mp: 207.6-208.9 °C.  $^1\text{H}$  NMR ( $\text{CDCl}_3$ , 400 MHz)  $\delta$  12.35 (s, 2H), 8.93 (dd,  $J_1 = 8.0$  Hz,  $J_2 = 1.2$  Hz, 2H), 8.22-8.19 (m, 4H), 7.95 (dd,  $J_1 = 8.0$  Hz,  $J_2 = 1.6$  Hz, 2H), 7.51 (t,  $J = 8.0$  Hz, 2H), 7.42 (dd,  $J_1 = 8.0$  Hz,  $J_2 = 1.2$  Hz, 2H), 7.24-7.17 (m, 4H), 7.10 (dd,  $J_1 = 9.2$  Hz,  $J_2 = 4.4$  Hz, 2H).  $^{13}\text{C}$  NMR ( $\text{CDCl}_3$ , 100 MHz)  $\delta$  161.3 (d,  $J_{\text{C-F}} = 1.8$  Hz), 159.3 (d,  $J_{\text{C-F}} = 243.8$  Hz), 150.6 (d,  $J_{\text{C-F}} = 2.8$  Hz), 148.1, 138.8, 135.9, 134.8, 127.8, 127.7 (d,  $J_{\text{C-F}} = 6.4$  Hz), 122.1, 121.7, 121.1 (d,  $J_{\text{C-F}} = 8.1$  Hz), 120.3 (d,  $J_{\text{C-F}} = 24.4$  Hz), 118.7 (d,  $J_{\text{C-F}} = 24.3$  Hz), 117.1. HRMS (ESI-TOF) calcd for  $\text{C}_{32}\text{H}_{21}\text{F}_2\text{N}_4\text{O}_3^+$   $[\text{M}+\text{H}]^+$ :547.1576, found:547.1571.

#### 6,6'-oxybis(3-chloro-*N*-(quinolin-8-yl)benzamide) (2aa)

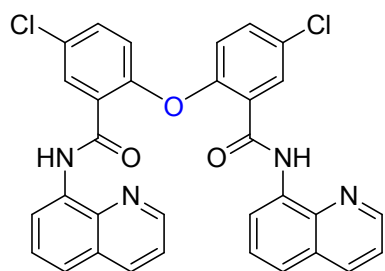

Yield: (24.3 mg, 42%); White solid; mp: 213.5-214.6 °C.  $^1\text{H}$  NMR ( $\text{CDCl}_3$ , 400 MHz)  $\delta$  12.21 (s, 2H), 8.92 (dd,  $J_1 = 7.6$  Hz,  $J_2 = 1.2$  Hz, 2H), 8.63 (d,  $J = 2.8$  Hz, 2H), 8.19 (dd,  $J_1 = 4.0$  Hz,  $J_2 = 1.2$  Hz, 2H), 7.96 (dd,  $J_1 = 8.4$  Hz,  $J_2 = 1.6$  Hz, 2H), 7.62 (dd,  $J_1 = 8.8$  Hz,  $J_2 = 2.4$  Hz, 2H), 7.52 (t,  $J = 8.0$  Hz, 2H), 7.43 (dd,  $J_1 = 8.4$  Hz,  $J_2 = 1.2$  Hz, 2H), 7.20 (dd,  $J_1 = 8.0$  Hz,  $J_2 = 4.4$  Hz, 2H), 7.02 (d,  $J = 8.8$  Hz, 2H).  $^{13}\text{C}$  NMR ( $\text{CDCl}_3$ , 100 MHz)  $\delta$  161.0, 153.3, 148.2, 138.8, 136.2, 135.9, 135.3, 134.8, 127.8,

127.2, 122.1, 121.7, 121.3, 118.2, 117.1. **HRMS** (ESI-TOF) calcd for  $C_{32}H_{21}Cl_2N_4O_3^+$   $[M]^+$ :579.0985, found:579.0992.

**6,6'-oxybis(3-iodo-*N*-(quinolin-8-yl)benzamide) (2ab)**

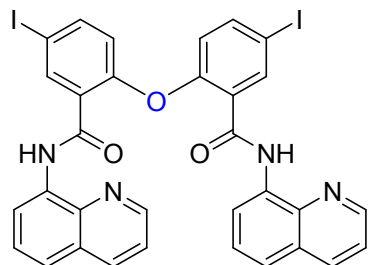

Yield: (26.7 mg, 35%); White solid; mp: 228.6-229.6 °C. **<sup>1</sup>H NMR** (CDCl<sub>3</sub>, 400 MHz) δ 12.18 (s, 2H), 8.91 (dd,  $J_1 = 7.6$  Hz,  $J_2 = 1.2$  Hz, 2H), 8.80 (d,  $J = 2.0$  Hz, 2H), 8.19 (dd,  $J_1 = 4.0$  Hz,  $J_2 = 1.6$  Hz, 2H), 7.96 (dd,  $J_1 = 8.4$  Hz,  $J_2 = 1.6$  Hz, 2H), 7.80 (dd,  $J_1 = 8.8$  Hz,  $J_2 = 2.4$  Hz, 2H), 7.52 (t,  $J = 8.0$  Hz, 2H), 7.43 (dd,  $J_1 = 8.4$  Hz,  $J_2 = 1.2$  Hz, 2H), 7.20 (dd,  $J_1 = 8.4$  Hz,  $J_2 = 4.4$  Hz, 2H), 6.88 (d,  $J = 8.8$  Hz, 2H). **<sup>13</sup>C NMR** (CDCl<sub>3</sub>, 100 MHz) δ 160.9, 154.1, 148.2, 142.1, 141.2, 138.8, 135.9, 134.8, 128.0, 127.8, 127.2, 122.1, 121.7, 121.5, 117.1, 88.6. **HRMS** (ESI-TOF) calcd for  $C_{32}H_{21}I_2N_4O_3^+$   $[M+H]^+$ :762.9698, found:762.9705.

**2-(3-fluoro-2-(quinolin-8-ylcarbamoyl)phenoxy)-4-methyl-*N*-(quinolin-8-yl)benzamide (3a)**

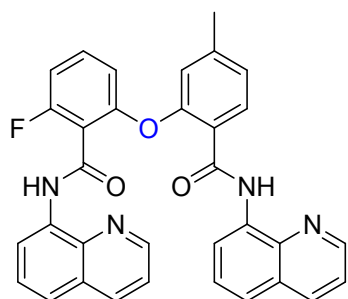

Yield: (30.4 mg, 28%); White solid; mp: 180.5-181.2 °C. **<sup>1</sup>H NMR** (CDCl<sub>3</sub>, 400 MHz) δ 12.04 (s, 1H), 10.85 (s, 1H), 8.93-8.87 (m, 2H), 8.38 (dd,  $J_1 = 4.0$  Hz,  $J_2 = 1.6$  Hz, 1H), 8.23 (d,  $J = 8.0$  Hz, 1H), 8.01-7.95 (m, 2H), 7.77 (dd,  $J_1 = 4.0$  Hz,  $J_2 = 1.6$  Hz, 1H), 7.56-7.38 (m, 5H), 7.20 (dd,  $J_1 = 8.0$  Hz,  $J_2 = 4.0$  Hz, 1H), 7.13 (dd,  $J_1 = 8.4$  Hz,  $J_2 = 4.0$  Hz, 2H), 7.08 (t,  $J = 8.8$  Hz, 1H), 6.98 (s, 1H), 6.85 (d,  $J = 8.4$  Hz, 1H), 2.36 (s, 3H). **<sup>13</sup>C NMR** (CDCl<sub>3</sub>, 100 MHz) δ 162.6, 162.5, 160.1, 159.9, 155.3, 155.2, 154.5, 148.3, 147.7, 144.7, 139.1, 138.5, 135.9, 135.8, 135.4, 134.4, 132.1, 132.0, 131.9, 127.9, 127.7, 127.3, 127.1, 126.0, 123.1, 122.1, 121.6, 121.5, 121.4, 120.8, 118.3, 117.2, 117.2, 114.9, 114.8, 112.1, 111.9, 21.4. **HRMS** (ESI-TOF) calcd for  $C_{33}H_{24}FN_4O_3^+$

[M+H]<sup>+</sup>:543.1827, found:543.1823.

**4-methyl-N-(quinolin-8-yl)-2-(2-(quinolin-8-ylcarbamoyl)-3-(trifluoromethyl)phenoxy)benzamide (3b)**

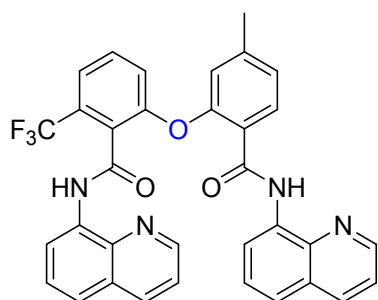

Yield: (39.1 mg, 33%); White solid; mp: 185.2-187.8 °C. <sup>1</sup>H

**NMR** (CDCl<sub>3</sub>, 400 MHz) δ 11.93 (s, 1H), 10.60 (s, 1H), 8.89-8.84 (m, 2H), 8.27 (dd, *J*<sub>1</sub> = 4.4 Hz, *J*<sub>2</sub> = 2.0 Hz, 1H), 8.22 (d, *J* = 8.0 Hz, 1H), 8.04 (dd, *J*<sub>1</sub> = 8.0 Hz, *J*<sub>2</sub> = 1.2 Hz, 1H), 7.93 (dd, *J*<sub>1</sub> = 8.0 Hz, *J*<sub>2</sub> = 1.6 Hz, 1H), 7.61 (d, *J* = 7.6 Hz, 1H), 7.56-7.46 (m, 5H), 7.42 (dd, *J*<sub>1</sub> = 8.4 Hz, *J*<sub>2</sub> = 1.2 Hz, 1H), 7.25-7.21 (m, 2H), 7.13 (d, *J* = 8.0 Hz, 1H), 7.08 (dd, *J*<sub>1</sub> = 8.4 Hz, *J*<sub>2</sub> = 4.4 Hz, 1H), 6.98 (s, 1H), 2.35 (s, 3H). <sup>13</sup>C **NMR** (CDCl<sub>3</sub>, 100 MHz) δ 162.5, 162.4, 154.9, 154.3, 148.1, 147.5, 144.9, 139.2, 138.5, 136.0, 135.8, 135.3, 134.3, 132.1, 131.1, 130.0, 129.7, 128.1, 128.1, 127.9, 127.7, 127.3, 127.1, 126.3, 123.3, 122.5, 122.3, 122.1, 121.9, 121.8, 121.8, 121.7, 121.6, 121.3, 121.2, 117.5, 117.4, 27.0, 26.9, 21.3.

**HRMS** (ESI-TOF) calcd for C<sub>34</sub>H<sub>24</sub>F<sub>3</sub>N<sub>4</sub>O<sub>3</sub><sup>+</sup> [M+H]<sup>+</sup>:593.1795, found:593.1792.

**methyl 3-(5-methyl-2-(quinolin-8-ylcarbamoyl)phenoxy)-4-(quinolin-8-ylcarbamoyl)benzoate (3c)**

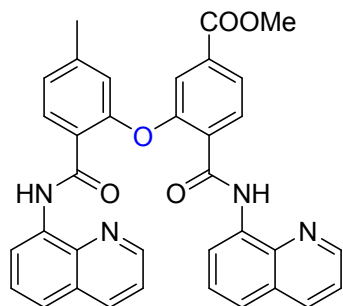

Yield: (30.3 mg, 26%); White solid; mp: 216.6-219.6 °C. <sup>1</sup>H

**NMR** (CDCl<sub>3</sub>, 400 MHz) δ 12.43 (s, 1H), 12.29 (s, 1H), 8.98-8.94 (t, *J* = 6.8 Hz, 2H), 8.60 (d, *J* = 8.0 Hz, 1H), 8.42 (d, *J* = 8.4 Hz, 1H), 8.18 (dd, *J*<sub>1</sub> = 4.4 Hz, *J*<sub>2</sub> = 1.6 Hz, 1H), 8.14 (dd, *J*<sub>1</sub> = 4.4 Hz, *J*<sub>2</sub> = 1.6 Hz, 1H), 8.03 (dd, *J*<sub>1</sub> = 8.0 Hz, *J*<sub>2</sub> = 1.6 Hz, 1H), 7.95 (dd, *J*<sub>1</sub> = 3.6 Hz, *J*<sub>2</sub> = 1.6 Hz, 1H), 7.93 (dd, *J*<sub>1</sub> = 4.0 Hz, *J*<sub>2</sub> = 2.0 Hz, 1H), 7.78 (d, *J* = 1.6 Hz, 1H), 7.51 (td, *J*<sub>1</sub> = 8.0 Hz, *J*<sub>2</sub> = 1.2 Hz, 2H), 7.43-7.38 (m, 2H), 7.22 (d, *J* = 8.0 Hz, 1H), 7.18-7.13 (m, 2H), 6.88 (s, 1H), 3.87 (s, 3H), 2.35 (s, 3H). <sup>13</sup>C **NMR** (CDCl<sub>3</sub>, 100 MHz) δ 165.6, 162.7,

161.9, 154.6, 154.3, 148.2, 147.9, 144.8, 138.9, 135.8, 135.7, 135.3, 134.9, 134.7, 132.6, 132.5, 130.3, 129.8, 129.2, 127.8, 127.7, 127.2, 127.1, 126.2, 125.4, 123.4, 122.1, 121.6, 121.6, 121.5, 120.9, 120.0, 117.1, 116.9, 52.6, 21.5. **HRMS** (ESI-TOF) calcd for  $C_{35}H_{27}N_4O_5^+$   $[M+H]^+$ :583.1976, found:583.1975.

**4-methyl-2-(3-methyl-2-(quinolin-8-ylcarbamoyl)phenoxy)-*N*-(quinolin-8-yl)benzamide (3d)**

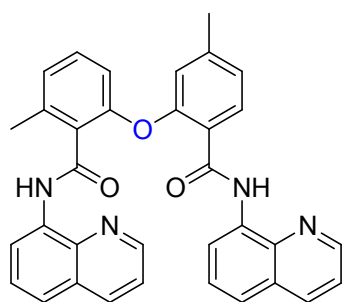

Yield: (32.2 mg, 30%); White solid; mp: 140.4-143.6 °C. **<sup>1</sup>H**

**NMR** (CDCl<sub>3</sub>, 400 MHz) δ 12.20 (s, 1H), 10.52 (s, 1H), 8.85-8.82 (m, 2H), 8.32 (dd,  $J_1 = 4.4$  Hz,  $J_2 = 1.6$  Hz, 1H), 8.18 (d,  $J = 8.4$  Hz, 1H), 8.03 (dd,  $J_1 = 8.4$  Hz,  $J_2 = 1.6$  Hz, 1H), 7.93 (dd,  $J_1 = 8.0$  Hz,  $J_2 = 1.6$  Hz, 1H), 7.56 (dd,  $J_1 = 4.4$  Hz,  $J_2 = 1.6$  Hz, 1H), 7.51-7.39 (m, 4H), 7.32 (t,  $J = 8.0$  Hz, 1H), 7.25 (dd,  $J_1 = 8.0$  Hz,  $J_2 = 4.4$  Hz, 1H), 7.17 (d,  $J = 7.2$  Hz, 1H), 7.09-7.05 (m, 2H), 6.95 (s, 1H), 6.93 (d,  $J = 8.4$  Hz, 1H), 2.66 (s, 3H), 2.34 (s, 3H). **<sup>13</sup>C NMR** (CDCl<sub>3</sub>, 100 MHz) δ 165.0, 162.8, 155.4, 153.7, 148.2, 147.4, 144.5, 139.3, 138.8, 138.5, 135.8, 135.7, 135.6, 134.5, 131.9, 130.7, 129.7, 127.8, 127.7, 127.3, 127.1, 126.5, 125.3, 122.5, 121.9, 121.5, 121.4, 121.2, 120.3, 117.1, 117.0, 21.4, 19.9. **HRMS** (ESI-TOF) calcd for  $C_{34}H_{27}N_4O_3^+$   $[M+H]^+$ :539.2078, found:539.2074.

**3-(5-methyl-2-(quinolin-8-ylcarbamoyl)phenoxy)-*N*-(quinolin-8-yl)-[1,1'-biphenyl]-2-carboxamide (3e)**

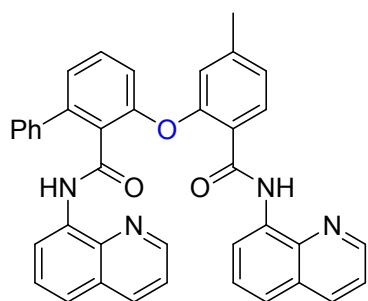

Yield: (36.0 mg, 30%); White solid; mp: 193.2-195.0 °C. **<sup>1</sup>H**

**NMR** (CDCl<sub>3</sub>, 400 MHz) δ 12.22 (s, 1H), 10.47 (s, 1H), 8.89 (dd,  $J_1 = 7.6$  Hz,  $J_2 = 0.8$  Hz, 1H), 8.63 (dd,  $J_1 = 7.2$  Hz,  $J_2 = 1.6$  Hz, 1H), 8.35 (dd,  $J_1 = 4.4$  Hz,  $J_2 = 1.6$  Hz, 1H), 8.21 (d,  $J = 8.0$  Hz, 1H), 8.01 (dd,  $J_1 = 8.0$  Hz,  $J_2 = 1.6$  Hz, 1H), 7.92 (dd,  $J_1 = 8.0$  Hz,  $J_2 = 1.6$  Hz,

1H), 7.67 (d,  $J = 7.2$  Hz, 2H), 7.58 (dd,  $J_1 = 4.0$  Hz,  $J_2 = 1.6$  Hz, 1H), 7.55 (t,  $J = 8.0$  Hz, 1H), 7.50-7.45 (m, 2H), 7.41-7.35 (m, 5H), 7.31 (d,  $J = 7.2$  Hz, 1H), 7.19 (dd,  $J_1 = 8.0$  Hz,  $J_2 = 4.4$  Hz, 1H), 7.08 (d,  $J = 8.4$  Hz, 2H), 7.07 (d,  $J = 8.4$  Hz, 1H), 7.03 (s, 1H), 2.35 (s, 3H).  $^{13}\text{C}$  NMR ( $\text{CDCl}_3$ , 100 MHz)  $\delta$  164.7, 162.9, 155.3, 154.2, 148.2, 147.4, 144.6, 142.6, 139.9, 139.3, 138.4, 135.8, 135.7, 135.6, 134.4, 131.9, 130.9, 129.2, 128.6, 127.9, 127.8, 127.7, 127.3, 127.1, 126.2, 125.5, 122.8, 121.8, 121.4, 121.2, 120.7, 118.4, 117.2, 117.0, 21.4. **HRMS** (ESI-TOF) calcd for  $\text{C}_{39}\text{H}_{29}\text{N}_4\text{O}_3^+$   $[\text{M}+\text{H}]^+$ :601.2234, found:601.2230.

**3-(3-methyl-2-(quinolin-8-ylcarbamoyl)phenoxy)-*N*-(quinolin-8-yl)-[1,1'-biphenyl]-4-carboxamide (3f)**

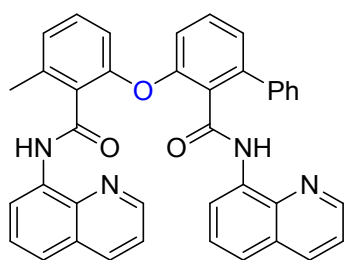

Yield: (33.6 mg, 28%); White solid; mp: 215.2-217.7 °C.  $^1\text{H}$

**NMR** ( $\text{CDCl}_3$ , 400 MHz)  $\delta$  9.99 (s, 1H), 9.72 (s, 1H), 8.76 (dd,  $J_1 = 7.6$  Hz,  $J_2 = 0.8$  Hz, 1H), 8.53 (dd,  $J_1 = 7.2$  Hz,  $J_2 = 1.2$  Hz, 1H), 8.14 (dd,  $J_1 = 4.4$  Hz,  $J_2 = 1.6$  Hz, 1H), 8.08 (dd,  $J_1 = 4.0$  Hz,  $J_2 = 1.6$  Hz, 1H), 7.79 (td,  $J_1 = 8.8$  Hz,  $J_2 = 1.6$  Hz, 2H), 7.46-7.40 (m, 3H), 7.36-7.26 (m, 3H), 7.23-7.16 (m, 5H), 7.13-7.01 (m, 6H), 2.42 (s, 3H).  $^{13}\text{C}$  NMR ( $\text{CDCl}_3$ , 100 MHz)  $\delta$  165.4, 164.9, 154.6, 153.6, 147.7, 147.5, 141.9, 139.6, 138.0, 137.9, 137.8, 135.4, 135.3, 134.3, 134.2, 130.5, 130.4, 129.9, 129.4, 128.8, 128.5, 128.2, 127.5, 127.4, 127.3, 126.9, 126.1, 125.3, 121.5, 121.2, 121.1, 120.9, 117.5, 117.2, 116.6, 116.4, 19.5.

**HRMS** (ESI-TOF) calcd for  $\text{C}_{39}\text{H}_{29}\text{N}_4\text{O}_3^+$   $[\text{M}+\text{H}]^+$ :601.2234, found:601.2232.

**4-methoxy-2-(5-methyl-2-(quinolin-8-ylcarbamoyl)phenoxy)-*N*-(quinolin-8-yl)benzamide (3g)**

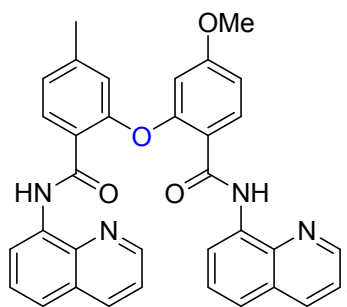

Yield: (44.4 mg, 40%); White solid; mp: 210.7-211.2 °C.  $^1\text{H}$

**NMR** ( $\text{CDCl}_3$ , 400 MHz)  $\delta$  12.38 (s, 1H), 12.35 (s, 1H), 8.97 (d,  $J = 7.6$  Hz, 2H), 8.48 (d,  $J = 8.8$  Hz, 1H), 8.41 (d,  $J = 8.0$  Hz, 1H), 8.21-8.19 (m, 2H), 7.91 (d,  $J = 8.4$  Hz, 2H), 7.50 (t,

$J = 8.0$  Hz, 2H), 7.38 (dd,  $J_1 = 3.2$  Hz,  $J_2 = 1.2$  Hz, 1H), 7.36 (dd,  $J_1 = 3.2$  Hz,  $J_2 = 1.2$  Hz, 1H), 7.19 (d,  $J = 8.4$  Hz, 1H), 7.16-7.12 (m, 2H), 6.94 (s, 1H), 6.91 (dd,  $J_1 = 8.8$  Hz,  $J_2 = 2.4$  Hz, 1H), 6.59 (d,  $J = 6.4$  Hz, 1H), 3.77 (s, 3H), 2.34 (s, 3H).  $^{13}\text{C}$  NMR ( $\text{CDCl}_3$ , 100 MHz)  $\delta$  163.6, 162.9, 162.8, 156.2, 154.4, 148.0, 148.0, 144.6, 138.9, 135.7, 135.6, 135.4, 133.8, 132.3, 127.8, 127.2, 127.1, 125.9, 123.3, 121.5, 121.4, 121.3, 120.2, 118.7, 116.8, 116.7, 110.5, 105.3, 55.8, 21.5. HRMS (ESI-TOF) calcd for  $\text{C}_{34}\text{H}_{27}\text{N}_4\text{O}_4^+$   $[\text{M}+\text{H}]^+$ :555.2027, found:555.2029.

**4-methoxy-2-(3-methyl-2-(quinolin-8-ylcarbamoyl)phenoxy)-*N*-(quinolin-8-yl)benzamide (3h)**

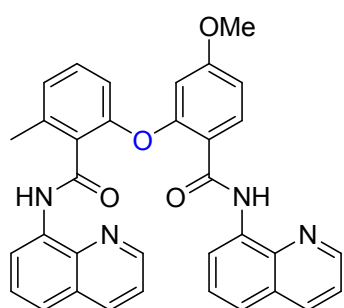

Yield: (35.5 mg, 32%); White solid; mp: 146.8-148.1 °C.  $^1\text{H}$  NMR ( $\text{CDCl}_3$ , 400 MHz)  $\delta$  12.14 (s, 1H), 10.51 (s, 1H), 8.97 (d,  $J = 7.6$  Hz, 2H), 8.84-8.80 (m, 2H), 8.34 (dd,  $J_1 = 4.0$  Hz,  $J_2 = 1.6$  Hz, 1H), 8.24 (d,  $J = 8.8$  Hz, 1H), 8.03 (dd,  $J_1 = 8.4$  Hz,  $J_2 = 1.6$  Hz, 1H), 7.93 (dd,  $J_1 = 8.4$  Hz,  $J_2 = 1.6$  Hz, 1H), 7.55 (dd,  $J_1 = 4.0$  Hz,  $J_2 = 1.6$  Hz, 1H), 7.52-7.39 (m, 4H), 7.34 (t,  $J = 8.0$  Hz, 1H), 7.26 (dd,  $J_1 = 8.4$  Hz,  $J_2 = 4.0$  Hz, 1H), 7.18 (d,  $J = 7.6$  Hz, 1H), 7.07 (dd,  $J_1 = 8.0$  Hz,  $J_2 = 4.0$  Hz, 1H), 6.97 (d,  $J = 8.0$  Hz, 1H), 3.79 (s, 3H), 2.65 (s, 3H).  $^{13}\text{C}$  NMR ( $\text{CDCl}_3$ , 100 MHz)  $\delta$  164.9, 163.7, 162.6, 156.9, 153.4, 148.2, 147.4, 139.3, 138.8, 138.5, 135.8, 135.7, 135.6, 134.5, 133.4, 130.7, 129.8, 127.8, 127.7, 127.3, 127.1, 126.8, 121.9, 121.4, 121.2, 121.2, 117.8, 117.2, 117.0, 110.4, 104.9, 55.7, 19.9. HRMS (ESI-TOF) calcd for  $\text{C}_{34}\text{H}_{27}\text{N}_4\text{O}_4^+$   $[\text{M}+\text{H}]^+$ :555.2027, found:555.2026.

**4. Crystal Structure of Product 2a and 2b**

The ORTEP diagram and Crystal Parameters of **2a** and **2b** wherein thermal ellipsoids are drawn at 30% probability level. The crystals of suitable quality were obtained from EA/PE within 2 days under aerobic conditions, and were analyzed by single crystal diffractometer (Varian, Gemini A Ultra). Atomic coordinates, bond lengths, bond angles, and thermal parameters have been deposited at the Cambridge Crystallographic Data Centre. CCDC deposit number of **2a** and **2b** is 1952681 and 1907742 respectively.

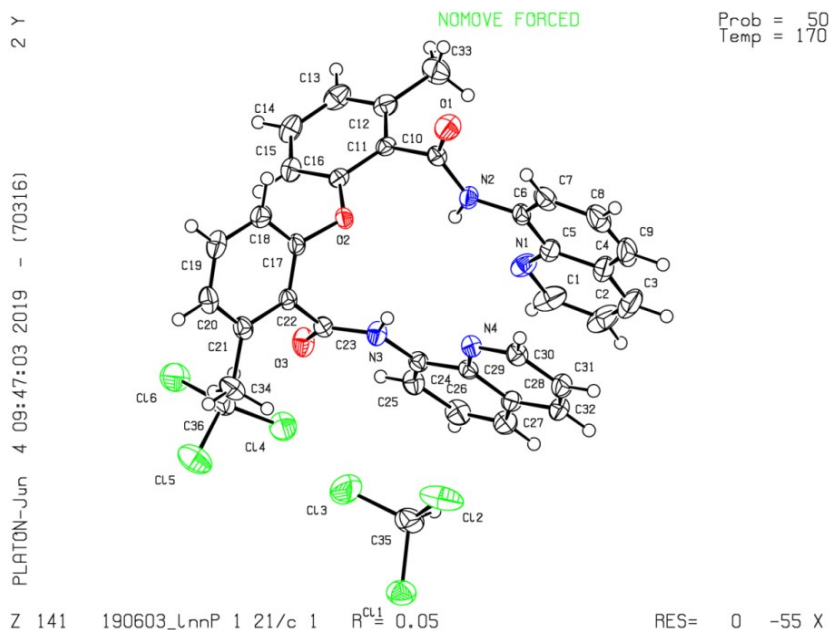

Figure S1: Crystal XRD image of **2a**

### Datablock: 190603\_Inn\_4\_17\_4\_0m

|                        |                                            |                                   |                           |
|------------------------|--------------------------------------------|-----------------------------------|---------------------------|
| Bond precision:        | C-C = 0.0035 Å                             | Wavelength=0.71073                |                           |
| Cell:                  | a=12.1345 (3)<br>alpha=90                  | b=14.3083 (3)<br>beta=104.081 (1) | c=20.8054 (6)<br>gamma=90 |
| Temperature:           | 170 K                                      |                                   |                           |
|                        | Calculated                                 | Reported                          |                           |
| Volume                 | 3503.78 (15)                               | 3503.78 (15)                      |                           |
| Space group            | P 21/c                                     | P 1 21/c 1                        |                           |
| Hall group             | -P 2ybc                                    | -P 2ybc                           |                           |
| Moiety formula         | C34 H26 N4 O3, 2(C H Cl3)                  | 2(C H Cl3), C34 H26 N4 O3         |                           |
| Sum formula            | C36 H28 Cl6 N4 O3                          | C36 H28 Cl6 N4 O3                 |                           |
| Mr                     | 777.32                                     | 777.32                            |                           |
| Dx, g cm <sup>-3</sup> | 1.474                                      | 1.474                             |                           |
| Z                      | 4                                          | 4                                 |                           |
| Mu (mm <sup>-1</sup> ) | 0.534                                      | 0.534                             |                           |
| F000                   | 1592.0                                     | 1592.0                            |                           |
| F000'                  | 1596.07                                    |                                   |                           |
| h, k, lmax             | 15, 17, 26                                 | 15, 17, 25                        |                           |
| Nref                   | 7163                                       | 7156                              |                           |
| Tmin, Tmax             | 0.784, 0.843                               | 0.683, 0.745                      |                           |
| Tmin'                  | 0.782                                      |                                   |                           |
| Correction method=     | # Reported T Limits: Tmin=0.683 Tmax=0.745 |                                   |                           |
| AbsCorr =              | MULTI-SCAN                                 |                                   |                           |
| Data completeness=     | 0.999                                      | Theta(max)= 26.386                |                           |
| R(reflections)=        | 0.0509( 6398)                              | wR2(reflections)= 0.1308( 7156)   |                           |
| S =                    | 1.035                                      | Npar= 444                         |                           |

Figure S2: Crystal data of **2a**



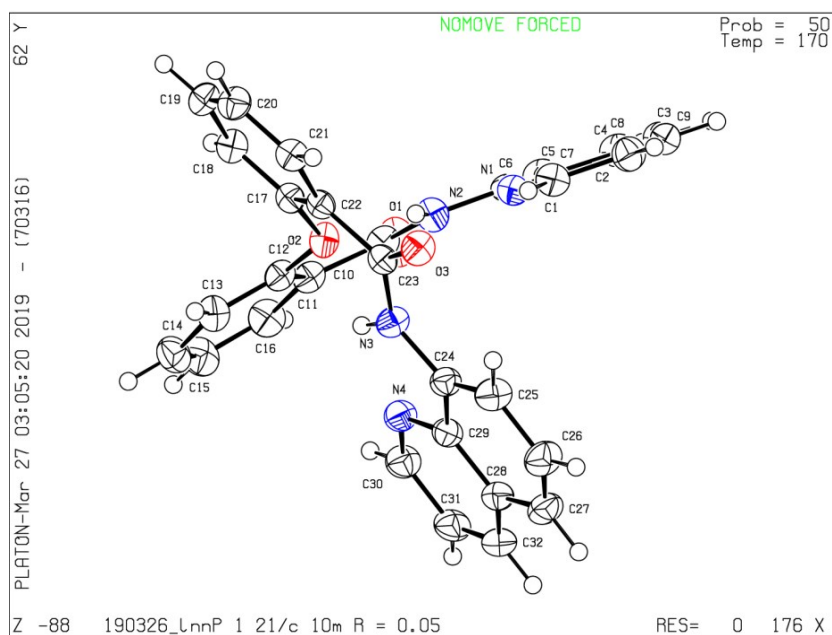

Figure S3: Crystal XRD image of **2b**

### Datablock: 190326\_lnn\_3\_160\_13\_0m

|                                                               |                |                                 |              |
|---------------------------------------------------------------|----------------|---------------------------------|--------------|
| Bond precision:                                               | C-C = 0.0026 Å | Wavelength=0.71073              |              |
| Cell:                                                         | a=11.0659(3)   | b=20.0575(6)                    | c=11.9398(3) |
|                                                               | alpha=90       | beta=110.868(1)                 | gamma=90     |
| Temperature:                                                  | 170 K          |                                 |              |
|                                                               | Calculated     | Reported                        |              |
| Volume                                                        | 2476.25(12)    | 2476.25(12)                     |              |
| Space group                                                   | P 21/c         | P 1 21/c 1                      |              |
| Hall group                                                    | -P 2ybc        | -P 2ybc                         |              |
| Moiety formula                                                | C32 H22 N4 O3  | C32 H22 N4 O3                   |              |
| Sum formula                                                   | C32 H22 N4 O3  | C32 H22 N4 O3                   |              |
| Mr                                                            | 510.54         | 510.53                          |              |
| Dx, g cm <sup>-3</sup>                                        | 1.369          | 1.369                           |              |
| Z                                                             | 4              | 4                               |              |
| Mu (mm <sup>-1</sup> )                                        | 0.090          | 0.090                           |              |
| F000                                                          | 1064.0         | 1064.0                          |              |
| F000'                                                         | 1064.45        |                                 |              |
| h, k, lmax                                                    | 14, 25, 15     | 14, 25, 15                      |              |
| Nref                                                          | 5463           | 5446                            |              |
| Tmin, Tmax                                                    | 0.963, 0.969   | 0.698, 0.746                    |              |
| Tmin'                                                         | 0.963          |                                 |              |
| Correction method= # Reported T Limits: Tmin=0.698 Tmax=0.746 |                |                                 |              |
| AbsCorr = MULTI-SCAN                                          |                |                                 |              |
| Data completeness=                                            | 0.997          | Theta (max)= 27.107             |              |
| R(reflections)=                                               | 0.0463( 4689)  | wR2(reflections)= 0.1237( 5446) |              |
| S =                                                           | 1.059          | Npar= 352                       |              |

Figure S4: Crystal data of **2b**

## 5. The Mechanistic Investigations

### 5.1. H/D exchange and kinetic isotopic effect experiments of synthesis of diaryl ether

#### 5.1.1. H/D exchange of synthesis of diaryl ether

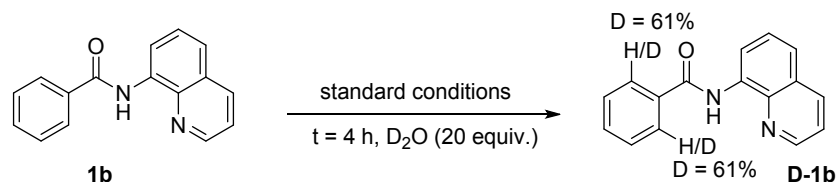

To a 25 mL seal tube with a stir bar was added benzamide (**1b**, 0.20 mmol), Ni(OAc)<sub>2</sub> (0.04 mmol, 7.0 mg), Ag<sub>3</sub>PO<sub>4</sub> (0.40 mmol, 166 mg), AdCOOK (0.40 mmol, 90 mg) and D<sub>2</sub>O (4.0 mmol, 80 mg) in DMAc (2.0 mL), the vial was evacuated and filled with O<sub>2</sub> atmosphere and stirred by oil bath at 140 °C for 4 h, then cooled to room temperature, filtered through a pad of celite, and then washed with EtOAc (10 mL×3), washed by 1 mol/L NaOH solution (20 mL) three times and saturated NaCl (20 mL), then dried with sodium sulfate. Organic solvents were removed under reduced pressure and the crude reaction mixture was purified by column chromatography on silica gel column with EtOAc/petroleum ether (1:10 v/v) as an eluent to afford the desired product **D-1b** (H/D D = 61%).

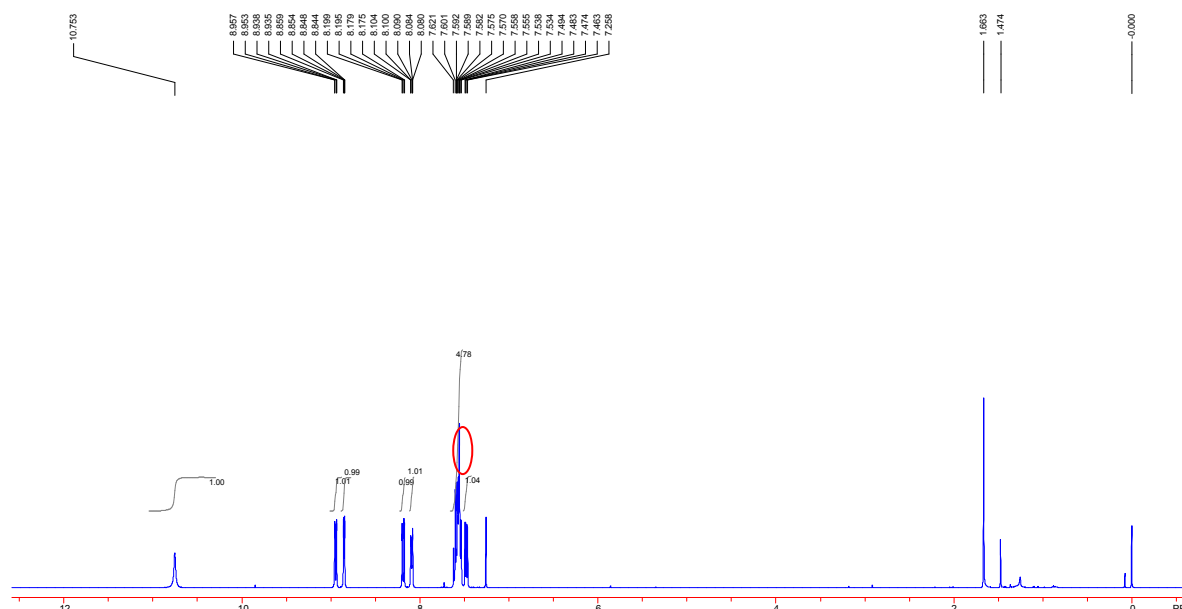

### 5.1.2. Competitive kinetic isotopic effect of synthesis of diaryl ether

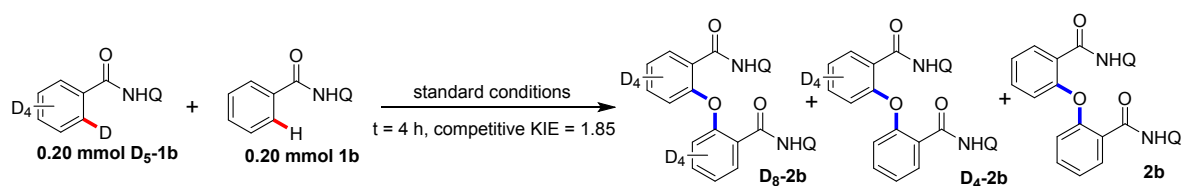

To a 25 mL seal tube with a stir bar was added benzamide (**D<sub>5</sub>-1b**, 0.20 mmol), benzamide (**1b**, 0.20 mmol), Ni(OAc)<sub>2</sub> (0.04 mmol, 7.0 mg), Ag<sub>3</sub>PO<sub>4</sub> (0.40 mmol, 166 mg) and AdCOOK (0.40 mmol, 90 mg) in DMAc (2.0 mL), the vial was evacuated and filled with O<sub>2</sub> atmosphere and stirred by oil bath at 140 °C for 4 h, then cooled to room temperature, filtered through a pad of celite, and then washed with EtOAc (10 mL×3), washed by 1 mol/L NaOH solution (20 mL) three times and saturated NaCl (20 mL), then dried with sodium sulfate. Organic solvents were removed under reduced pressure and the crude reaction mixture was purified by column chromatography on silica gel column with EtOAc/petroleum ether (1:10~1:5~1:2 v/v) as an eluent to afford the desired product **D<sub>8</sub>-2b**, **D<sub>4</sub>-2b** and **2b**, the value of competitive KIE is 1.85.

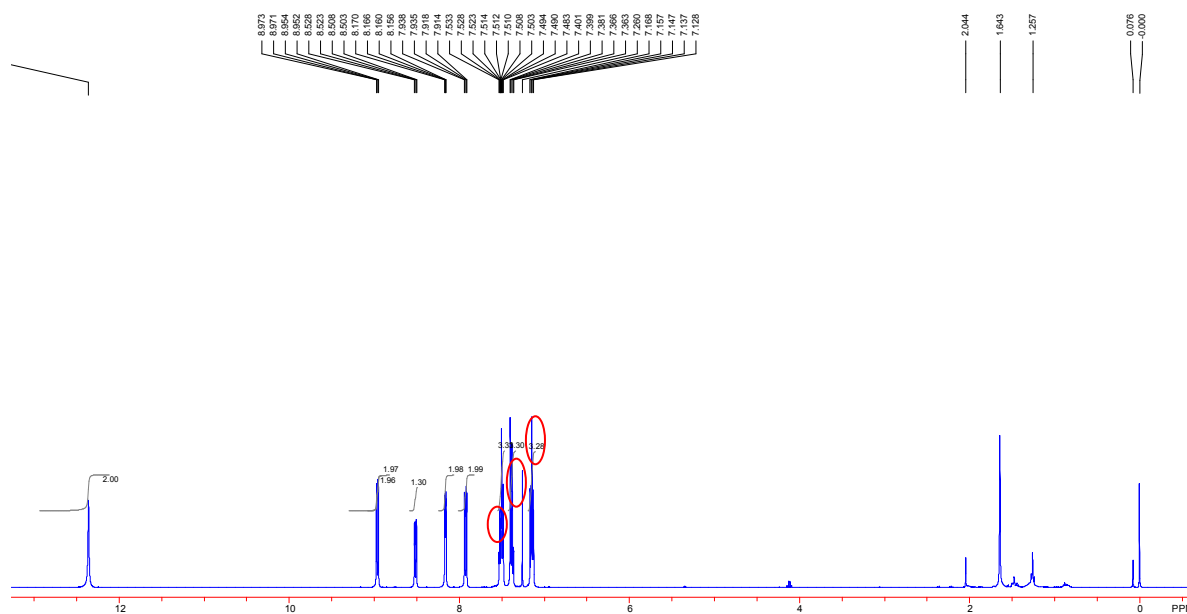

$$\text{KIE} = K_{\text{H}}/K_{\text{D}} = 1.3/0.7 = 1.85$$

### 5.1.3. Parallel kinetic isotopic effect of synthesis of diaryl ether

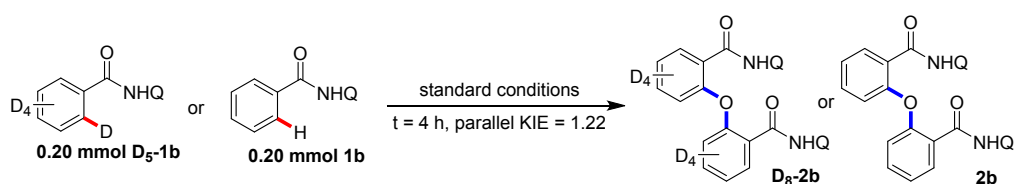

To a 25 mL seal tube with a stir bar was added benzamide (**D<sub>5</sub>-1b**, 0.20 mmol), Ni(OAc)<sub>2</sub> (0.04 mmol, 7.0 mg), Ag<sub>3</sub>PO<sub>4</sub> (0.40 mmol, 166 mg) and AdCOOK (0.40 mmol, 90 mg) in DMAc (2.0 mL), the vial was evacuated and filled with O<sub>2</sub> atmosphere and stirred by oil bath at 140 °C for 4 h, then cooled to room temperature, filtered through a pad of celite, and then washed with EtOAc (10 mL×3), washed by 1 mol/L NaOH solution (20 mL) three times and saturated NaCl (20 mL), then dried with sodium sulfate. Organic solvents were removed under reduced pressure and the crude reaction mixture was purified by column chromatography on silica gel column with EtOAc/petroleum ether (1:10~1:5~1:2 v/v) as an eluent to afford the desired product **D<sub>8</sub>-2b**.

To a 25 mL seal tube with a stir bar was added benzamide (**1b**, 0.20 mmol), Ni(OAc)<sub>2</sub> (0.04 mmol, 7.0 mg), Ag<sub>3</sub>PO<sub>4</sub> (0.40 mmol, 166 mg) and AdCOOK (0.40 mmol, 90 mg) in DMAc (2.0 mL), the vial was evacuated and filled with O<sub>2</sub> atmosphere and stirred by oil bath at 140 °C for 4 h, then cooled to room temperature, filtered through a pad of celite, and then washed with EtOAc (10 mL×3), washed by 1 mol/L NaOH solution (20 mL) three times and saturated NaCl (20 mL), then dried with sodium sulfate. Organic solvents were removed under reduced pressure and the crude reaction mixture was purified by column chromatography on silica gel column with EtOAc/petroleum ether (1:10~1:5~1:2 v/v) as an eluent to afford the desired product **2b**, the value of parallel KIE is **1.22**.

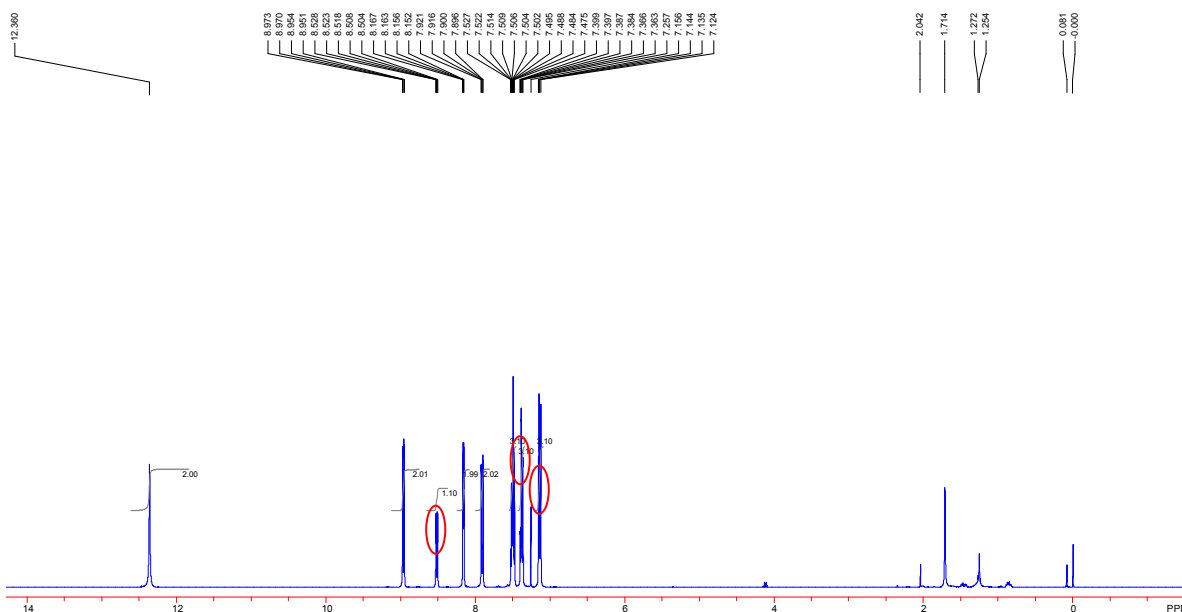

$$\text{KIE} = K_{\text{H}}/K_{\text{D}} = 1.1/0.9 = 1.22$$

## 5.2. Mechanistic control experiments of synthesis of diaryl ether

### 5.2.1. Radical-trapping experiment of synthesis of diaryl ether

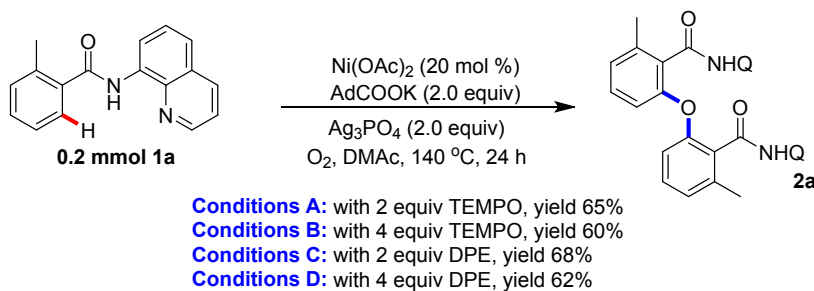

To a 25 mL seal tube with a stir bar was added benzamide (**1a**, 0.20 mmol), Ni(OAc)<sub>2</sub> (0.04 mmol, 7.0 mg), Ag<sub>3</sub>PO<sub>4</sub> (0.40 mmol, 166 mg), AdCOOK (0.40 mmol, 90 mg) and with different equivalents TEMPO or DPE in DMAc (2.0 mL), the vial was evacuated and filled with O<sub>2</sub> atmosphere and stirred by oil bath at 140 °C for 24 h, then cooled to room temperature, filtered through a pad of celite, and then washed with EtOAc (10 mL×3), washed by 1 mol/L NaOH solution (20 mL) three times and saturated NaCl (20 mL), then dried with sodium sulfate. Organic solvents were removed under reduced pressure and the crude reaction mixture was purified by column chromatography on silica gel column with

EtOAc/petroleum ether (1:10~1:5~1:2 v/v) as an eluent to afford the desired product **2a**, the yield of the **2a** hasn't decreased.

### 5.2.2. Control experiments of synthesis of diaryl ether

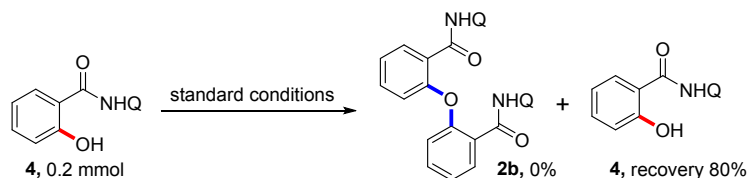

To a 25 mL seal tube with a stir bar was added benzamide **4**<sup>7</sup> (0.20 mmol), Ni(OAc)<sub>2</sub> (0.04 mmol, 7.0 mg), Ag<sub>3</sub>PO<sub>4</sub> (0.40 mmol, 166 mg), AdCOOK (0.40 mmol, 90 mg) in DMAc (2.0 mL), the vial was evacuated and filled with O<sub>2</sub> atmosphere and stirred by oil bath at 140 °C for 24 h, then cooled to room temperature and analyzed by TLC, only **4** was observed in this system, indicating that **2b** is not formed through dehydration of **4**.

**4**; <sup>1</sup>H NMR (CDCl<sub>3</sub>, 400 MHz) δ 12.33 (s, 1H), 10.93 (s, 1H), 8.85 (dd, *J*<sub>1</sub> = 4.0 Hz, *J*<sub>2</sub> = 1.6 Hz, 1H), 8.79 (dd, *J*<sub>1</sub> = 6.4 Hz, *J*<sub>2</sub> = 2.8 Hz, 1H), 8.16 (dd, *J*<sub>1</sub> = 8.0 Hz, *J*<sub>2</sub> = 1.2 Hz, 1H), 7.83 (dd, *J*<sub>1</sub> = 8.0 Hz, *J*<sub>2</sub> = 0.8 Hz, 1H), 7.58-7.53 (m, 2H), 7.49-7.44 (m, 2H), 7.05 (d, *J* = 8.0 Hz, 1H), 6.99 (t, *J* = 8.0 Hz, 1H).

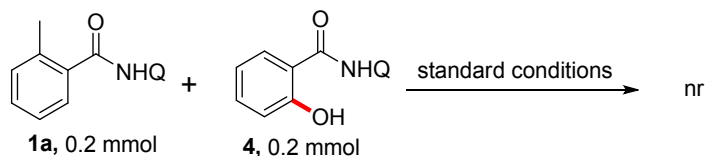

To a 25 mL seal tube with a stir bar was added benzamide (**1a**, 0.20 mmol) and benzamides (**4**, 0.20 mmol), Ni(OAc)<sub>2</sub> (0.04 mmol, 7.0 mg), Ag<sub>3</sub>PO<sub>4</sub> (0.40 mmol, 166 mg), AdCOOK (0.40 mmol, 90 mg) in DMAc (2.0 mL), the vial was evacuated and filled with O<sub>2</sub> atmosphere and stirred by oil bath at 140 °C for 24 h, only substrate **1a** and **4** was detected in this system, the corresponding diaryl ether product hasn't been observed.

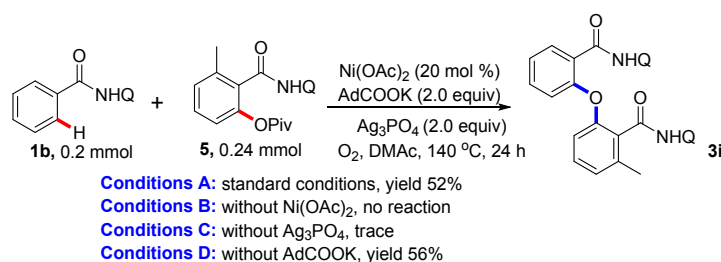

To a 25 mL seal tube with a stir bar was added substrate benzamide (**1b**, 0.20 mmol) and acyloxylated benzamides (**5**,<sup>8</sup> 0.24 mmol), in DMAc (2.0 mL) under O<sub>2</sub> atmosphere

according to the condition **A** to **D**. The reaction mixture was stirred at 140 °C for 24 h, cooled to room temperature, filtered through a pad of celite, and then washed with EtOAc (10 mL×3), washed by 1 mol/L NaOH solution (20 mL) three times and saturated NaCl (20 mL), then dried with sodium sulfate. Organic solvents were removed under reduced pressure and the crude reaction mixture was purified by column chromatography on silica gel column with EtOAc/petroleum ether (1:10~1:5~1:2 v/v) as an eluent to afford the diaryl ether product of **3i**. As for condition **B** and **C**, no or trace of product **3i** was observed. As for condition **A** and **D** the desired product **3i** was isolated in 52%, 56% respectively.

**5**; <sup>1</sup>H NMR (CDCl<sub>3</sub>, 400 MHz) δ 10.00 (s, 1H), 8.94 (dd, *J*<sub>1</sub> = 7.2 Hz, *J*<sub>2</sub> = 1.6 Hz, 1H), 8.77 (dd, *J*<sub>1</sub> = 4.0 Hz, *J*<sub>2</sub> = 1.6 Hz, 1H), 8.15 (dd, *J*<sub>1</sub> = 8.4 Hz, *J*<sub>2</sub> = 1.6 Hz, 1H), 7.60-7.53 (m, 2H), 7.43 (dd, *J*<sub>1</sub> = 8.0 Hz, *J*<sub>2</sub> = 4.0 Hz, 1H), 7.35 (t, *J* = 7.6 Hz, 1H), 7.16 (d, *J* = 7.6 Hz, 1H), 7.01 (d, *J* = 8.0 Hz, 1H), 2.47 (s, 3H), 1.08 (s, 9H).

**3i**; White solid; mp: 189.8-192.1 °C. <sup>1</sup>H NMR (CDCl<sub>3</sub>, 400 MHz) δ 12.19 (s, 1H), 10.45 (s, 1H), 8.89 (d, *J* = 7.6 Hz, 2H), 8.34 (dd, *J*<sub>1</sub> = 4.4 Hz, *J*<sub>2</sub> = 1.6 Hz, 1H), 8.27 (dd, *J*<sub>1</sub> = 8.0 Hz, *J*<sub>2</sub> = 1.2 Hz, 1H), 8.01 (d, *J* = 8.0 Hz, 1H), 7.90 (d, *J* = 8.0 Hz, 1H), 7.56 (dd, *J*<sub>1</sub> = 4.0 Hz, *J*<sub>2</sub> = 1.2 Hz, 1H), 7.51-7.43 (m, 4H), 7.40-7.32 (m, 2H), 7.27-7.22 (m, 2H), 7.18-7.13 (dd, *J*<sub>1</sub> = 13.2 Hz, *J*<sub>2</sub> = 7.6 Hz, 2H), 7.05 (dd, *J*<sub>1</sub> = 8.4 Hz, *J*<sub>2</sub> = 4.4 Hz, 1H), 6.97 (d, *J* = 8.4 Hz, 1H), 2.63 (s, 3H). <sup>13</sup>C NMR (CDCl<sub>3</sub>, 100 MHz) δ 164.4, 162.2, 155.1, 153.0, 147.8, 147.0, 138.7, 138.4, 137.9, 135.3, 135.2, 135.0, 133.9, 132.8, 131.5, 130.2, 129.4, 127.3, 127.2, 126.8, 126.6, 126.3, 124.6, 123.6, 121.4, 121.0, 120.7, 119.1, 116.9, 116.7, 116.5, 19.9. HRMS (ESI-TOF) calcd for C<sub>33</sub>H<sub>25</sub>N<sub>4</sub>O<sub>3</sub><sup>+</sup> [M+H]<sup>+</sup>:525.1921, found:525.1920.

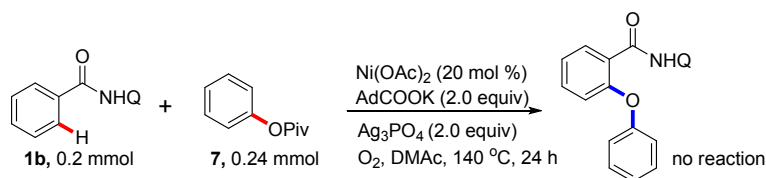

To a 25 mL seal tube with a stir bar was added substrate benzamide (**1b**, 0.20 mmol) and phenyl pivalate (**7**, 0.24 mmol), Ni(OAc)<sub>2</sub> (0.04 mmol, 7.0 mg), Ag<sub>3</sub>PO<sub>4</sub> (0.40 mmol, 166 mg), AdCOOK (0.40 mmol, 90 mg) in DMAc (2.0 mL), the vial was evacuated and filled with O<sub>2</sub> atmosphere and stirred by oil bath at 140 °C for 24 h, only substrate **1b** and **7** was detected in this system, the corresponding diaryl ether product hasn't been observed.

7;  $^1\text{H NMR}$  ( $\text{CDCl}_3$ , 400 MHz)  $\delta$  7.39-7.35 (m, 2H), 7.25-7.19 (m, 1H), 7.06 (dd,  $J = 8.8$  Hz,  $J = 1.2$  Hz, 1H), 1.36 (s, 9H).

### 5.3. The substances detected by GC-MS

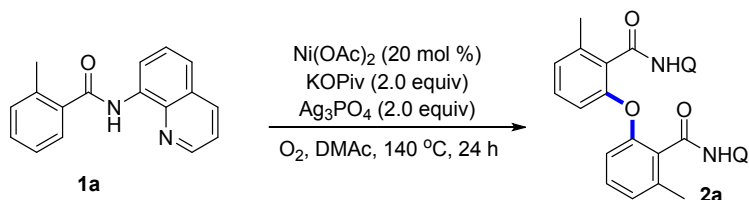

To a 25 mL seal tube with a stir bar was added benzamide (**1a**, 0.2 mmol),  $\text{Ni}(\text{OAc})_2$  (0.04 mmol, 7 mg),  $\text{Ag}_3\text{PO}_4$  (0.4 mmol, 166 mg) and KOPIV (2.0 mmol, 56 mg) in DMAc (2.0.0 mL), the vial was evacuated and filled with  $\text{O}_2$  atmosphere and stirred by oil bath at 140 °C for different time, then cooled to room temperature, filtered through a pad of celite, and then washed with EtOAc (20 mL $\times$ 3). The samples were detected by GC-MS respectively.

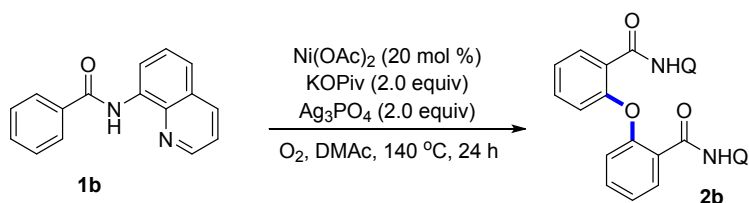

To a 50 mL seal tube with a stir bar was added benzamide (**1b**, 0.2 mmol),  $\text{Ni}(\text{OAc})_2$  (0.04 mmol, 7 mg),  $\text{Ag}_3\text{PO}_4$  (0.4 mmol, 166 mg) and KOPIV (2.0 mmol, 56 mg) in DMAc (2.0.0 mL), the vial was evacuated and filled with  $\text{O}_2$  atmosphere and stirred by oil bath at 140 °C for different time, then cooled to room temperature, filtered through a pad of celite, and then washed with EtOAc (20 mL $\times$ 3). The sample was detected by GC-MS respectively.



数据路径 : D:\MS5973\lan\1908\BSB\  
 数据文件 : 19082905.D  
 采集 : 29 Aug 2019 20:22  
 操作者 : [BSB1]  
 样品 : LNN-4-070-1  
 其他 :  
 ALS 样品瓶: 1 样品乘积因子: 1

积分参数 : autoint1.e  
 积分器 : 化学工作站

方法 : C:\msdchem\1\methods\lan.M  
 标题 :

信号: TIC: [BSB1]19082905.D\data.ms

| 峰 # | 保留时间 分钟 | 起始扫描 | 峰顶扫描 | 截止扫描 | 峰类型  | 峰高 峰高    | 修正面积       | 修正 % 最大值 | % 总量    |
|-----|---------|------|------|------|------|----------|------------|----------|---------|
| 1   | 2.520   | 33   | 51   | 115  | BV 4 | 21954923 | 6561756946 | 100.00%  | 47.921% |
| 2   | 3.092   | 115  | 118  | 120  | VV 3 | 15397195 | 410156962  | 6.25%    | 2.995%  |
| 3   | 3.131   | 120  | 122  | 125  | VV 3 | 15345477 | 380583633  | 5.80%    | 2.779%  |
| 4   | 3.173   | 125  | 127  | 135  | VV 3 | 15262220 | 485785710  | 7.40%    | 3.548%  |
| 5   | 7.783   | 658  | 663  | 673  | PV   | 314449   | 10965824   | 0.17%    | 0.080%  |
| 6   | 8.107   | 673  | 701  | 767  | VV   | 19956146 | 1809580089 | 27.58%   | 13.215% |
| 7   | 8.695   | 767  | 769  | 796  | VV 3 | 665196   | 64416876   | 0.98%    | 0.470%  |
| 8   | 8.969   | 796  | 801  | 843  | VV 7 | 314764   | 40500647   | 0.62%    | 0.296%  |
| 9   | 9.533   | 843  | 867  | 871  | VV 5 | 166340   | 7121860    | 0.11%    | 0.052%  |
| 10  | 9.666   | 871  | 882  | 893  | VV 2 | 244628   | 13261735   | 0.20%    | 0.097%  |
| 11  | 10.480  | 970  | 977  | 1000 | PV   | 719136   | 54672340   | 0.83%    | 0.399%  |
| 12  | 10.708  | 1000 | 1003 | 1017 | VV 4 | 174820   | 9094901    | 0.14%    | 0.066%  |
| 13  | 12.213  | 1172 | 1178 | 1193 | VV   | 293223   | 21630937   | 0.33%    | 0.158%  |
| 14  | 12.463  | 1193 | 1207 | 1213 | VV 9 | 279090   | 23679977   | 0.36%    | 0.173%  |
| 15  | 12.589  | 1213 | 1222 | 1229 | VV 4 | 370638   | 25416826   | 0.39%    | 0.186%  |
| 16  | 12.724  | 1229 | 1238 | 1325 | VV 3 | 28607299 | 2429026277 | 37.02%   | 17.739% |
| 17  | 13.503  | 1325 | 1328 | 1339 | VV 4 | 593826   | 38614230   | 0.59%    | 0.282%  |
| 18  | 14.095  | 1385 | 1397 | 1476 | VV   | 17856664 | 760955848  | 11.60%   | 5.557%  |
| 19  | 14.936  | 1485 | 1495 | 1556 | VV   | 2264432  | 112751823  | 1.72%    | 0.823%  |
| 20  | 26.314  | 2787 | 2817 | 2950 | BBA  | 1995622  | 432993341  | 6.60%    | 3.162%  |

修正后的面积和: 13692966782

lan.M Fri Aug 30 12:51:36 2019

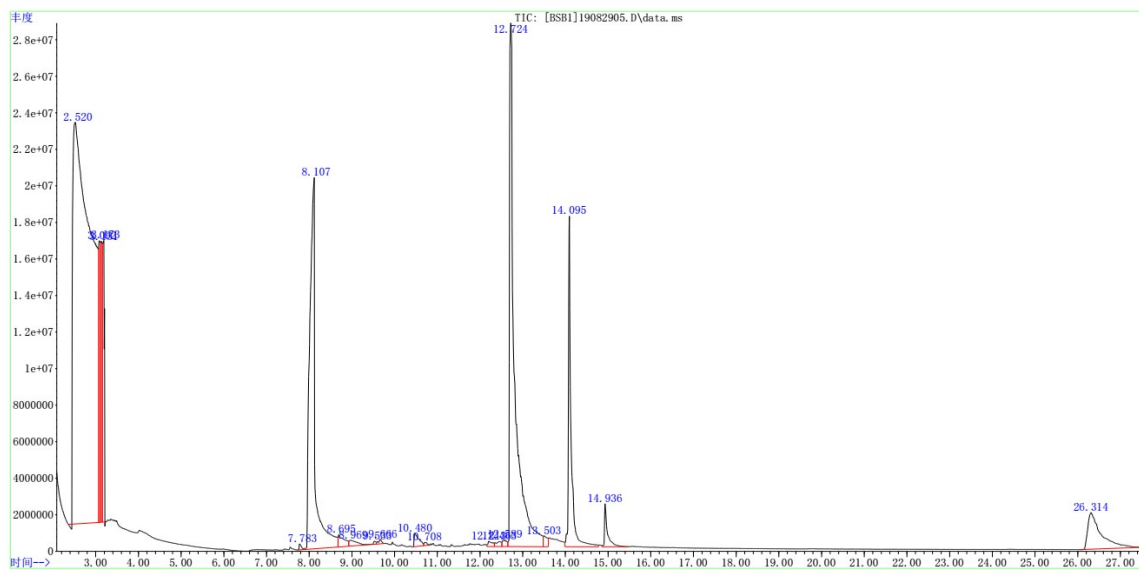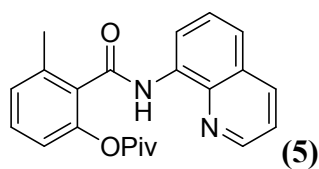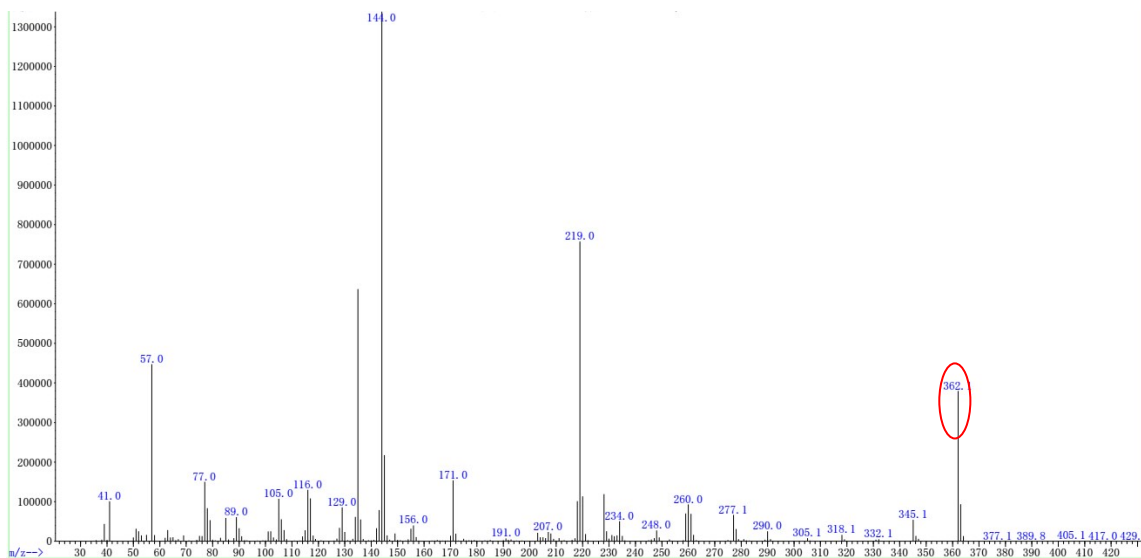

Figure S5: GC-MS information of compound 5

数据路径 : D:\MS5973\lan\1904\BSB\  
 数据文件 : 19041502.D  
 采集 : 15 Apr 2019 19:33  
 操作者 : [BSB1]  
 样品 : LNN-3-184-1  
 其他 :  
 ALS 样品瓶: 1 样品乘积因子: 1

积分参数 : autoint1.e  
 积分器 : 化学工作站

方法 : C:\msdchem\1\methods\lan.M  
 标题 :

信号: TIC: [BSB1]19041502.D\data.ms

| 峰 # | 保留时间 分钟 | 起始 扫描 | 峰顶 扫描 | 截止 扫描 | 峰 类型 | 峰高 峰高    | 修正 面积      | 修正 % 最大值 | % 总量    |
|-----|---------|-------|-------|-------|------|----------|------------|----------|---------|
| 1   | 2.567   | 41    | 55    | 132   | BV 5 | 19457351 | 7803892809 | 100.00%  | 44.386% |
| 2   | 3.259   | 132   | 133   | 138   | VV 3 | 15204653 | 522900166  | 6.70%    | 2.974%  |
| 3   | 3.318   | 138   | 140   | 145   | VV 4 | 15151259 | 534816878  | 6.85%    | 3.042%  |
| 4   | 3.380   | 145   | 147   | 154   | VV 6 | 15120011 | 753074618  | 9.65%    | 4.283%  |
| 5   | 3.513   | 154   | 162   | 167   | VV 7 | 15132504 | 1009464199 | 12.94%   | 5.742%  |
| 6   | 3.576   | 167   | 169   | 173   | VV 5 | 15141194 | 457585668  | 5.86%    | 2.603%  |
| 7   | 3.623   | 173   | 174   | 176   | VV 2 | 15136345 | 267816073  | 3.43%    | 1.523%  |
| 8   | 3.812   | 176   | 196   | 199   | VV 4 | 16193760 | 1711027661 | 21.93%   | 9.732%  |
| 9   | 3.875   | 199   | 203   | 206   | PV   | 535829   | 12131558   | 0.16%    | 0.069%  |
| 10  | 3.947   | 206   | 211   | 228   | VB   | 2947904  | 61186563   | 0.78%    | 0.348%  |
| 11  | 4.530   | 267   | 276   | 308   | BB   | 11744395 | 280980572  | 3.60%    | 1.598%  |
| 12  | 11.190  | 1018  | 1028  | 1082  | BV 2 | 23731387 | 1280845342 | 16.41%   | 7.285%  |
| 13  | 12.453  | 1157  | 1170  | 1177  | BB   | 737224   | 10640552   | 0.14%    | 0.061%  |
| 14  | 12.770  | 1194  | 1206  | 1287  | BV 3 | 24297797 | 2875500113 | 36.85%   | 16.355% |

修正后的面积和: 17581862771

lan.M Mon Apr 15 20:00:48 2019

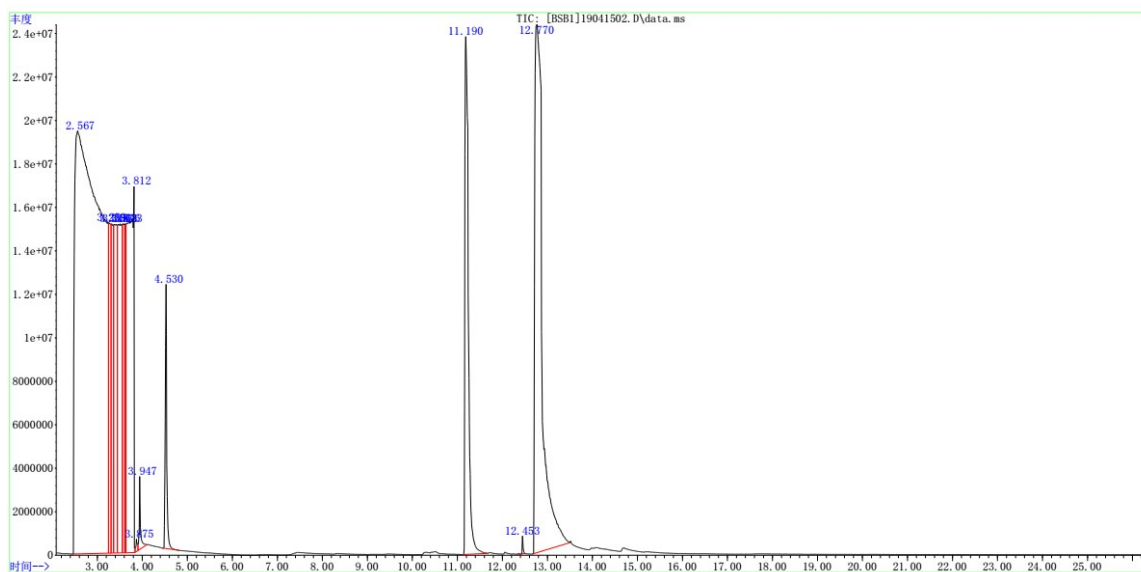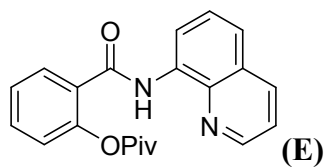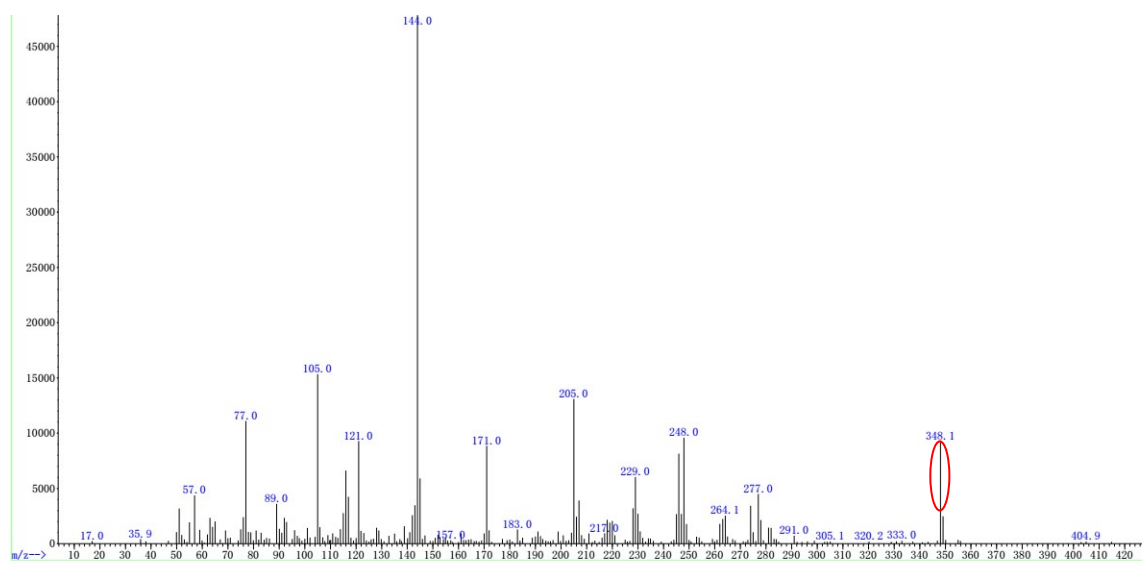

Figure S6: GC-MS information of intermediate **E**

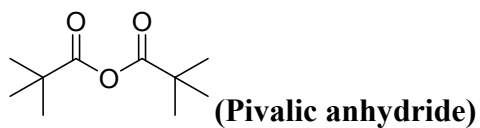

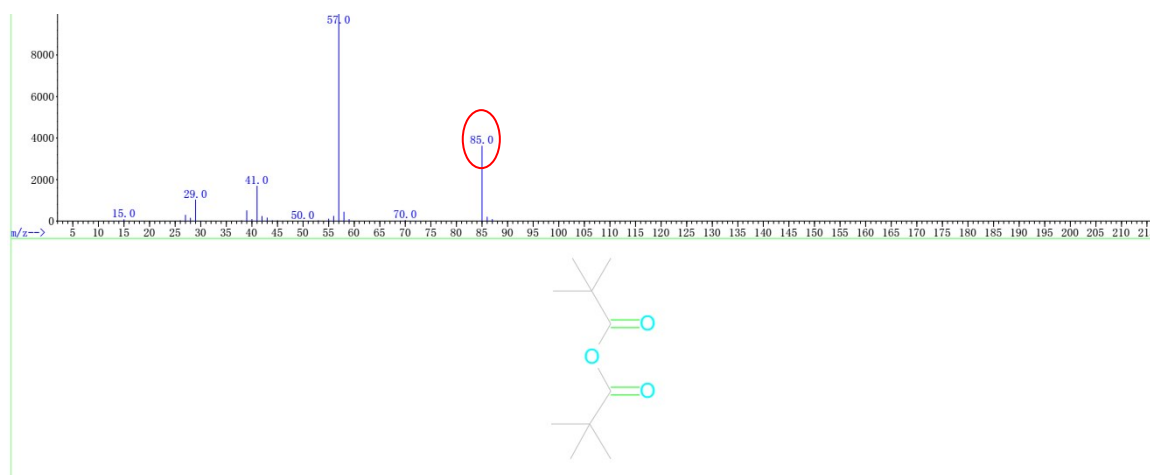

Figure S7: GC-MS information of Pivalic anhydride

## 6. Removal of 8-quinolyl Auxiliary

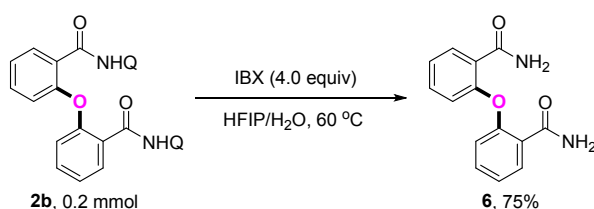

To a 25 mL round-bottom flask with a stir bar was added diaryl ether (**2b**, 0.20 mmol), IBX (0.80 mmol, 224 mg), in the mixed solvent of HFIP/H<sub>2</sub>O (3.0 mL,  $V_{\text{HFIP}}/V_{\text{H}_2\text{O}} = 1:1$ ) and stirred by oil bath at 60 °C for 6 h.<sup>9</sup> Then cooled to room temperature, the reaction was quenched by the addition of NaHCO<sub>3</sub> (aq 10 mL); the resulting mixture was extracted with dichloromethane (3×5 mL). Organic solvents were removed under reduced pressure and the crude reaction mixture was purified by column chromatography on silica gel column with EtOAc/petroleum ether (1:1, v/v) as an eluent to afford the primary benzamide product **6** in 75% yield.

**6**; (75%, 38.4 mg); White solid; mp: >220 °C. **<sup>1</sup>H NMR** ((CD<sub>3</sub>)<sub>2</sub>SO, 500 MHz) δ 8.05 (s, 2H), 7.76 (d,  $J = 7.0$  Hz, 2H), 7.56 (s, 2H), 7.47 (t,  $J = 8.0$  Hz, 2H), 7.24 (t,  $J = 7.0$  Hz, 2H), 6.87 (d,  $J = 8.0$  Hz, 2H). **<sup>13</sup>C NMR** ((CD<sub>3</sub>)<sub>2</sub>SO, 100 MHz) δ 166.8, 153.3, 132.2, 130.5, 126.6, 123.8, 118.5. **HRMS** (ESI-TOF) calcd for C<sub>14</sub>H<sub>12</sub>N<sub>2</sub>O<sub>3</sub>Na<sup>+</sup> [M+Na]<sup>+</sup>:279.0740, found:279.0743.

## 7. Reference

- [1] L. D. Tran, I. Popov and O. Daugulis. Copper-Promoted Sulfenylation of  $sp^2$  C–H Bonds *J. Am. Chem. Soc.*, 2012, **134**, 18237–12840.
- [2] Y. Ano, M. Tobisu and N. Chatani. Palladium-Catalyzed Direct *ortho*-Alkynylation of Aromatic Carboxylic Acid Derivatives *Org. Lett.*, 2012, **14**, 354–357.
- [3] L. D. Tran, J. Roane and O. Daugulis. Directed Amination of Non-Acidic Arene C–H Bonds by a Copper–Silver Catalytic System. *Angew. Chem. Int. Ed.*, 2013, **52**, 6043–6046.
- [4] L. Grigorjeva and O. Daugulis. Cobalt-Catalyzed, Aminoquinoline-Directed  $C(sp^2)$ –H Bond Alkenylation by Alkynes. *Angew. Chem. Int. Ed.*, 2014, **53**, 10209–10212.
- [5] F.-R. Gou, X.-C. Wang, P.-F. Huo, H.-P. Bi, Z.-H. Guan and Y.-M. Liang. Palladium-Catalyzed Aryl C–H Bonds Activation/Acetoxylation Utilizing a Bidentate System. *Org. Lett.*, 2009, **11**, 5726–5729.
- [6] K. Shibata, and N. Chatani. Rhodium-Catalyzed Alkylation of C-H Bonds in Aromatic Amides with  $\alpha,\beta$ -Unsaturated Esters. *Org. Lett.*, 2014, **16**, 5148–5151.
- [7] B. K. Singh and R. Jana. Ligand-Enabled, Copper-Promoted Regio- and Chemoselective Hydroxylation of Arenes, Aryl Halides, and Aryl Methyl Ethers *J. Org. Chem.*, 2016, **81**, 831–841.
- [8] C. Lin, Z. Chen, Z. Liu and Y. Zhang. Direct *ortho*-Acyloxylation of Arenes and Alkenes by Cobalt Catalysis. *Adv. Synth. Catal.*, 2018, **360**, 519–532.
- [9] Z. Zhang, X. Li, M. Song, Y. Wan, D. Zheng, G. Zhang, and G. Chen. Selective Removal of Aminoquinoline Auxiliary by IBX Oxidation. *J. Org. Chem.*, 2019, **84**, 12792–12799.



## 2,2'-oxybis(*N*-(quinolin-8-yl)benzamide) (2b)

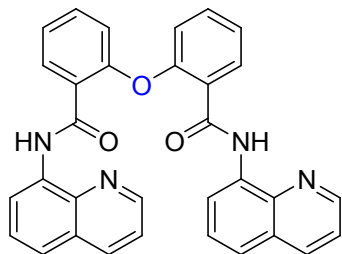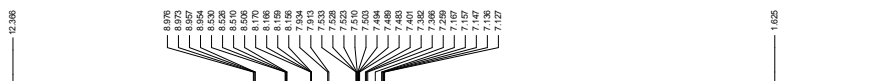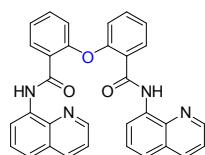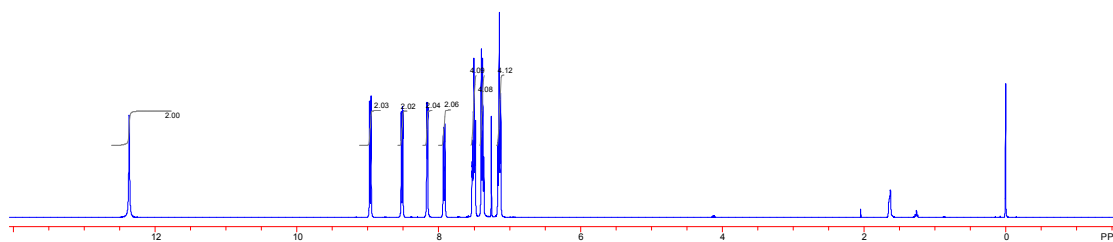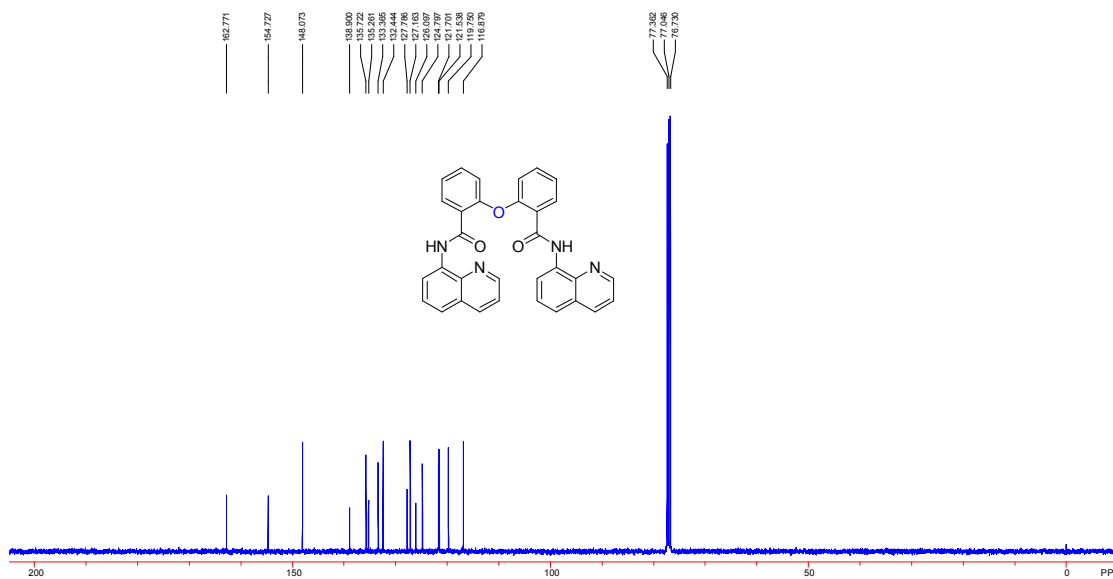



**3,3'-oxybis(*N*-(quinolin-8-yl)-[1,1'-biphenyl]-2-carboxamide) (2c)**

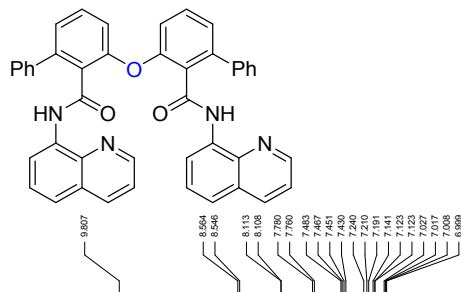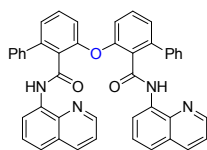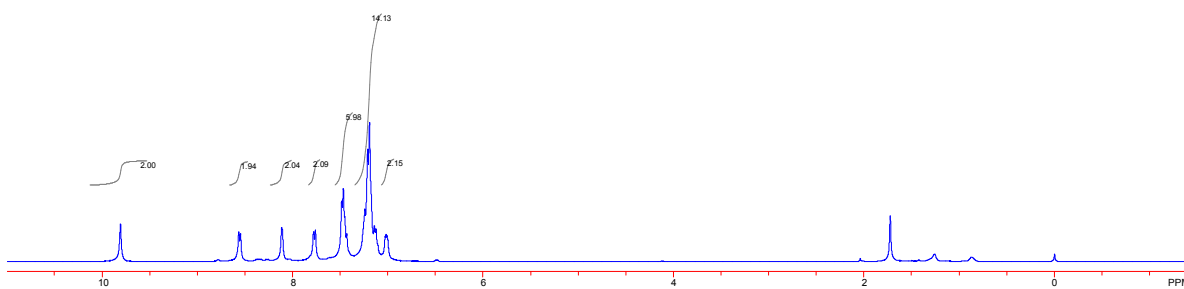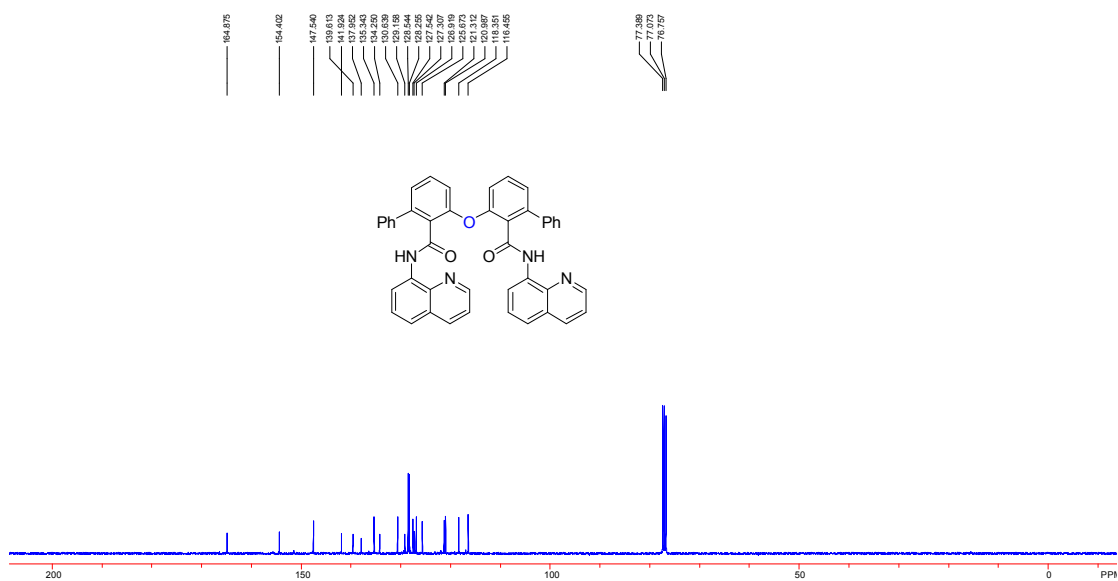

**6,6'-oxybis(2-fluoro-*N*-(quinolin-8-yl)benzamide) (2d)**

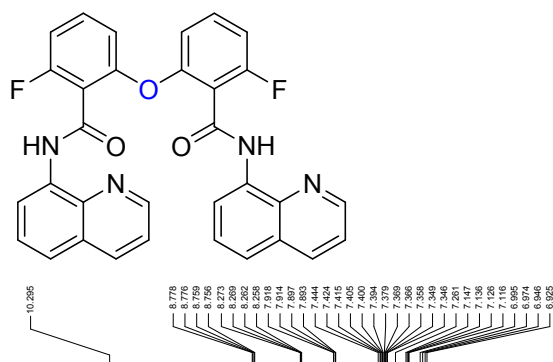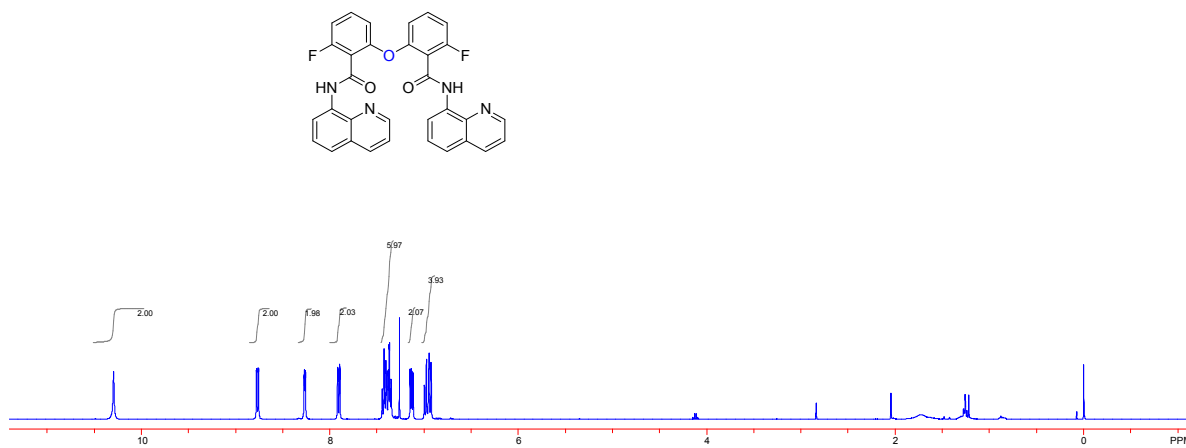

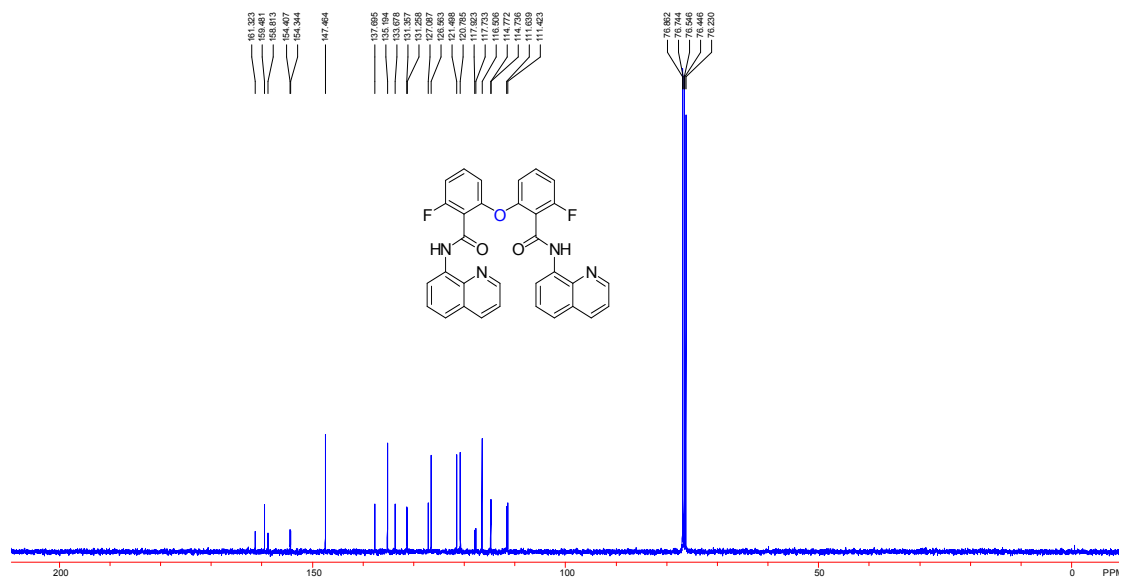

### 6,6'-oxybis(2-chloro-N-(quinolin-8-yl)benzamide) (2e)

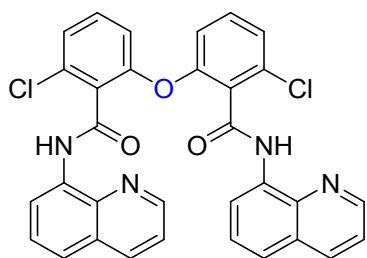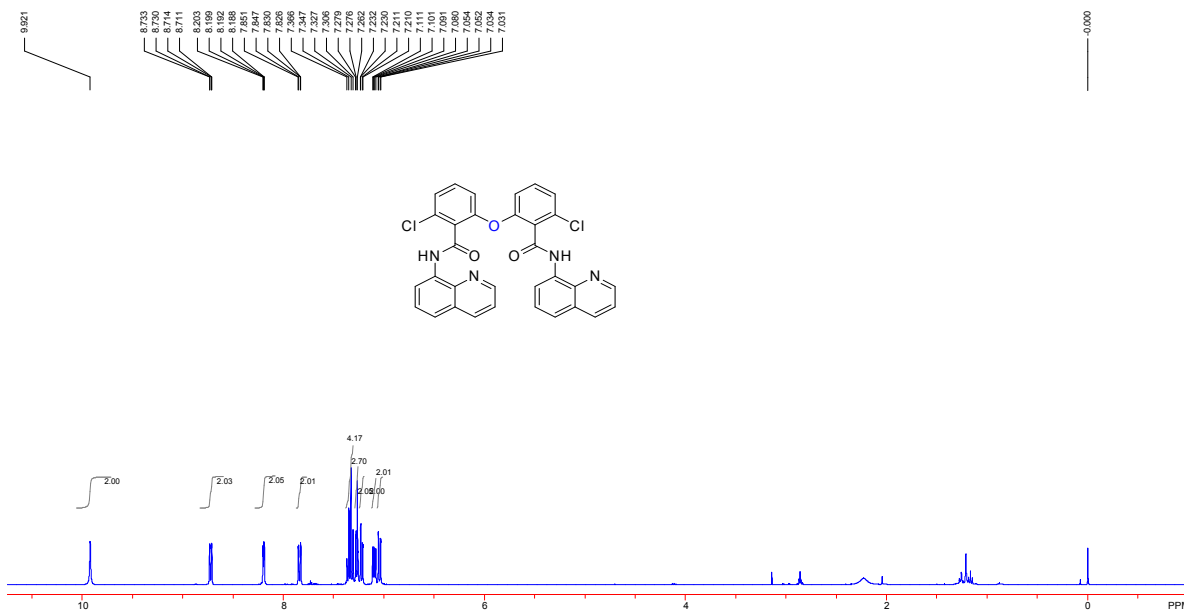

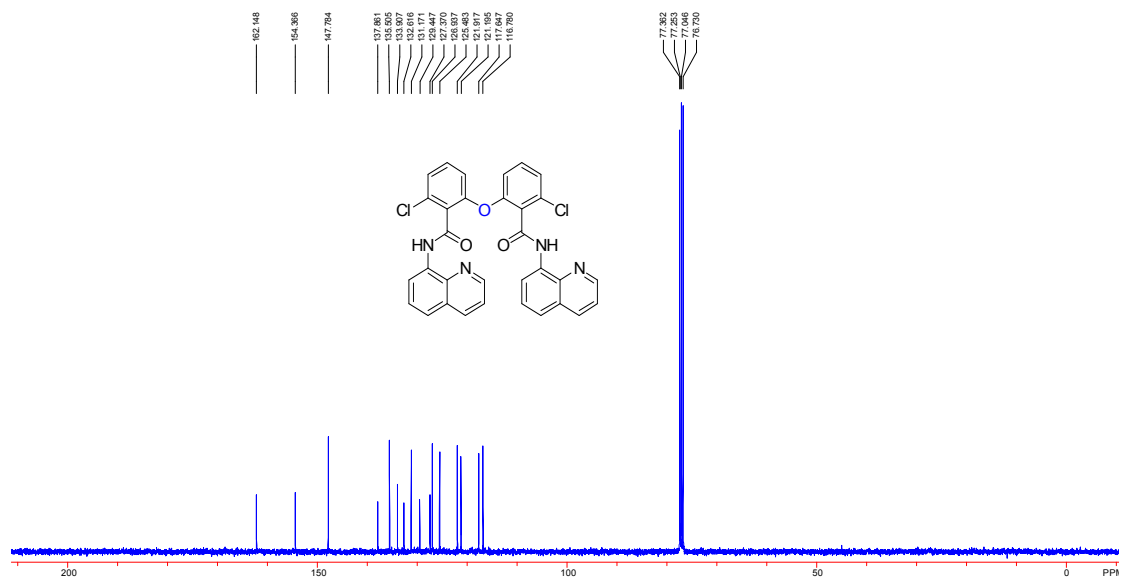

### 6,6'-oxybis(2-bromo-N-(quinolin-8-yl)benzamide) (2f)

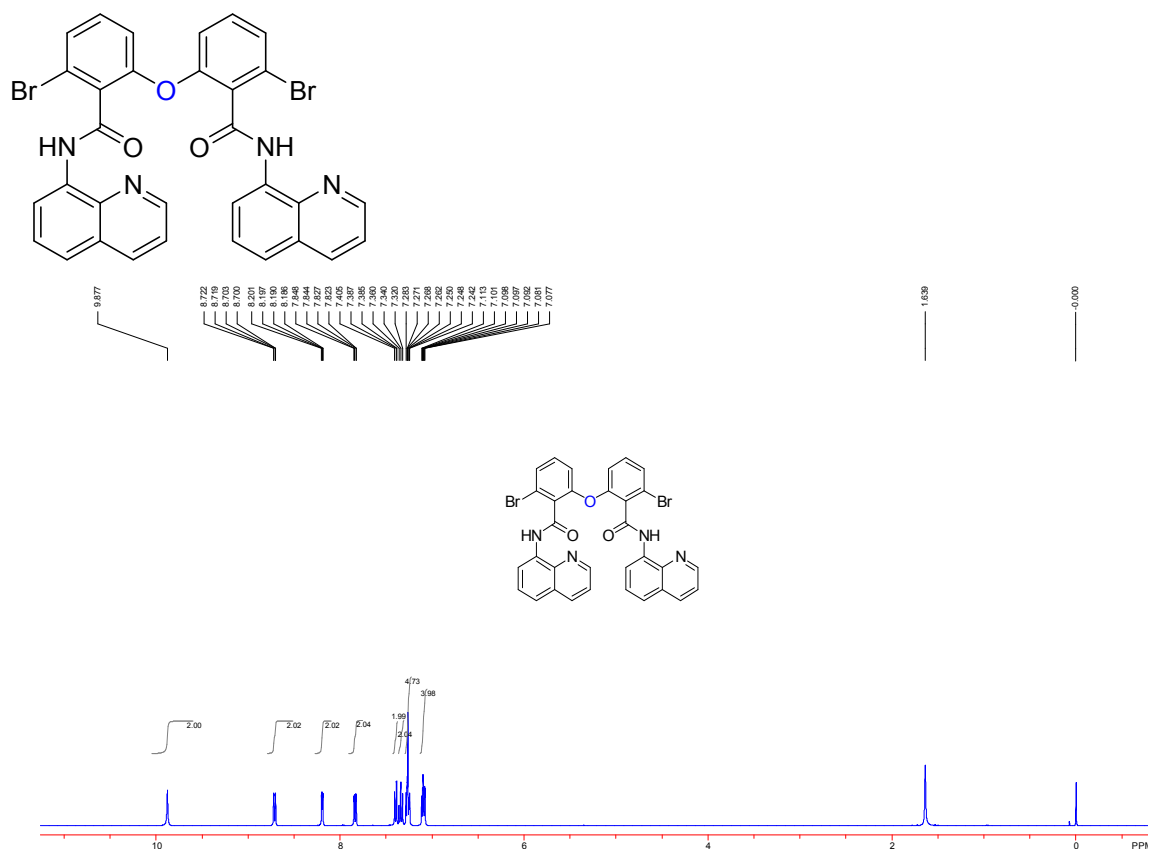

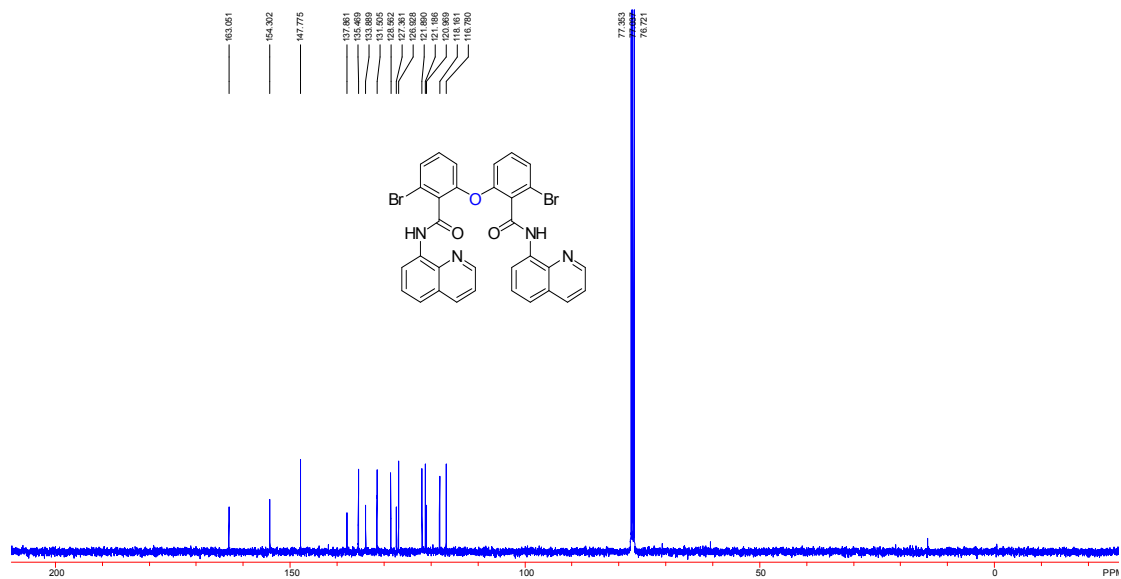

**6,6'-oxybis(*N*-(quinolin-8-yl)-2-(trifluoromethyl)benzamide) (2g)**

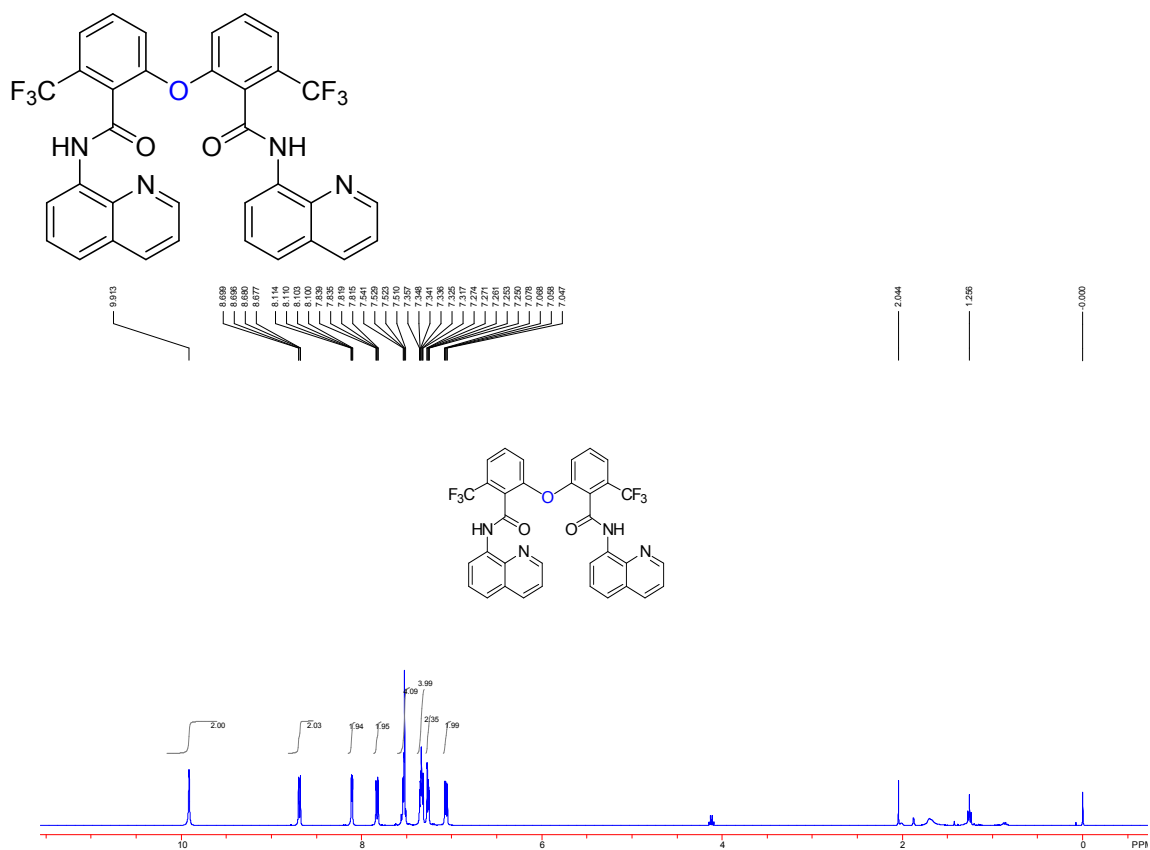



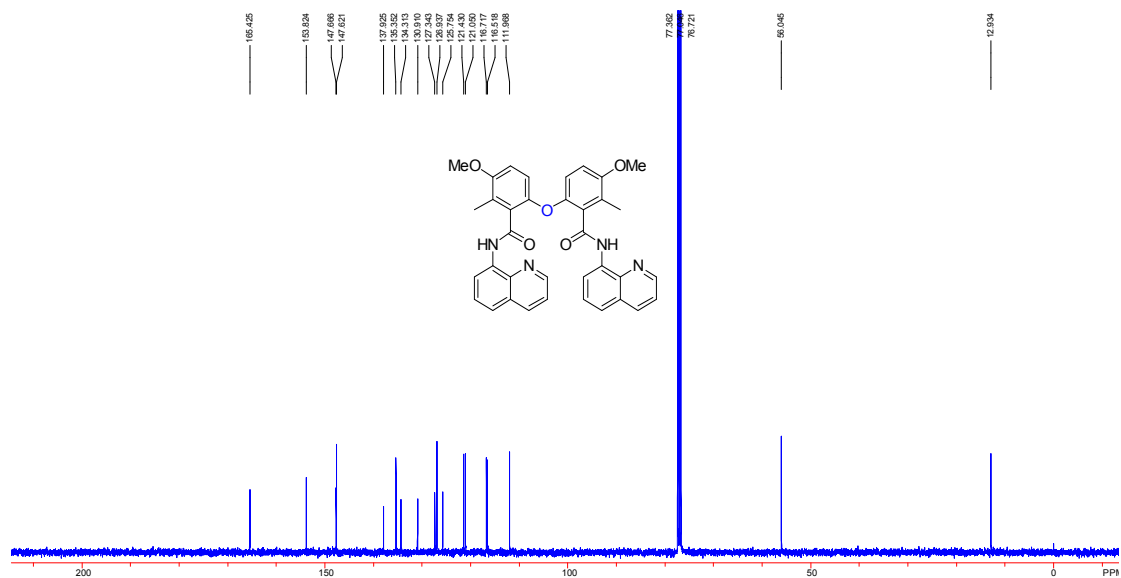

### 6,6'-oxybis(3-chloro-2-methyl-N-(quinolin-8-yl)benzamide) (2i)

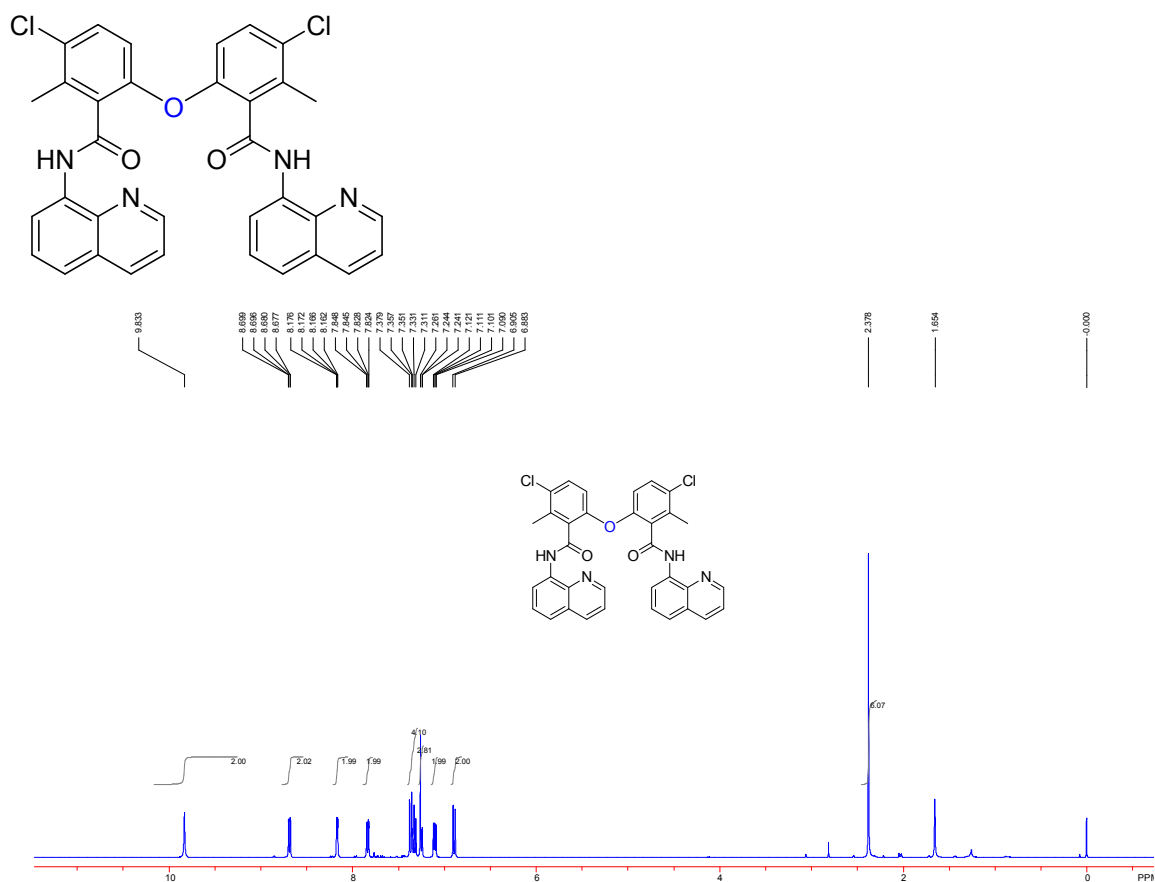

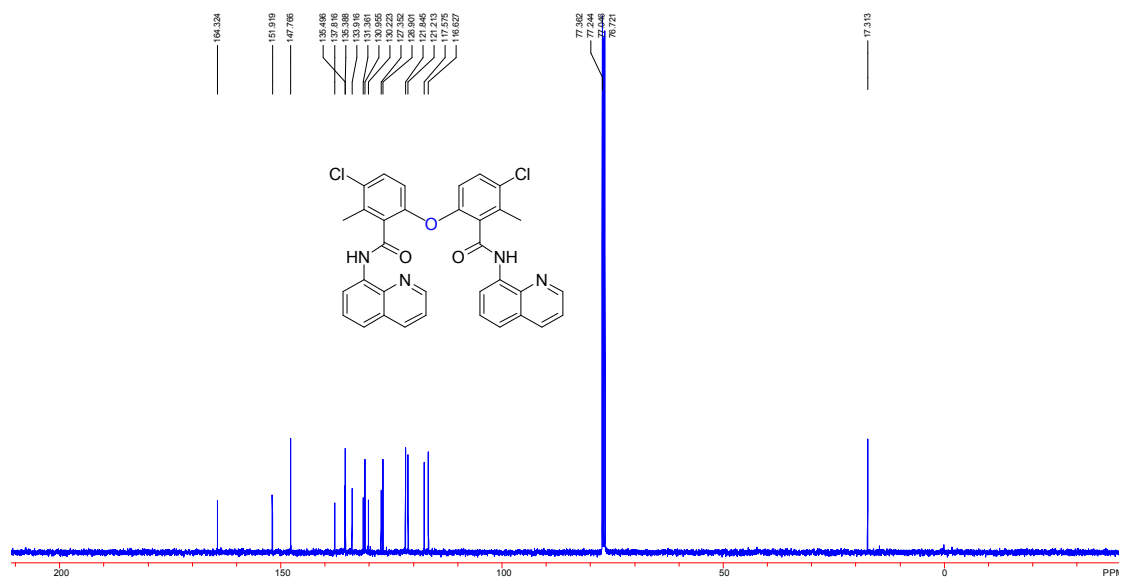

### 6,6'-oxybis(3-bromo-2-methyl-N-(quinolin-8-yl)benzamide) (2j)

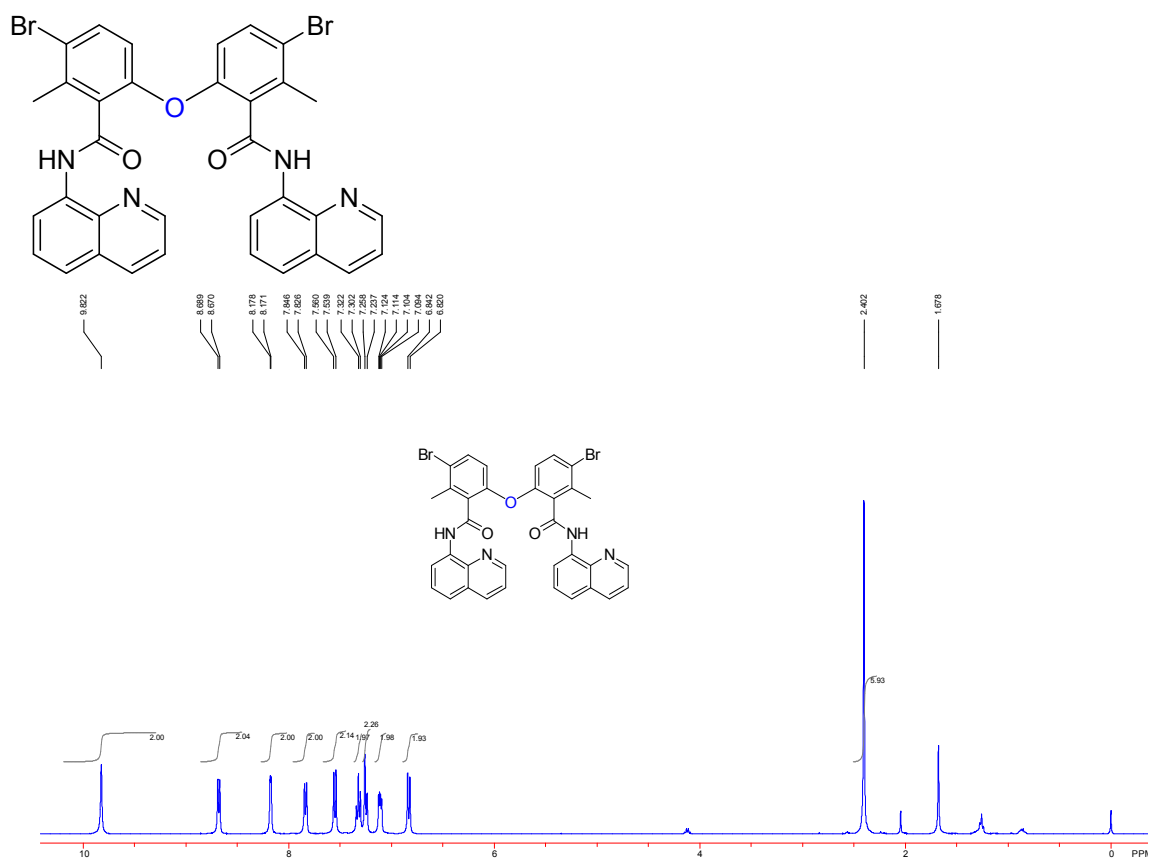



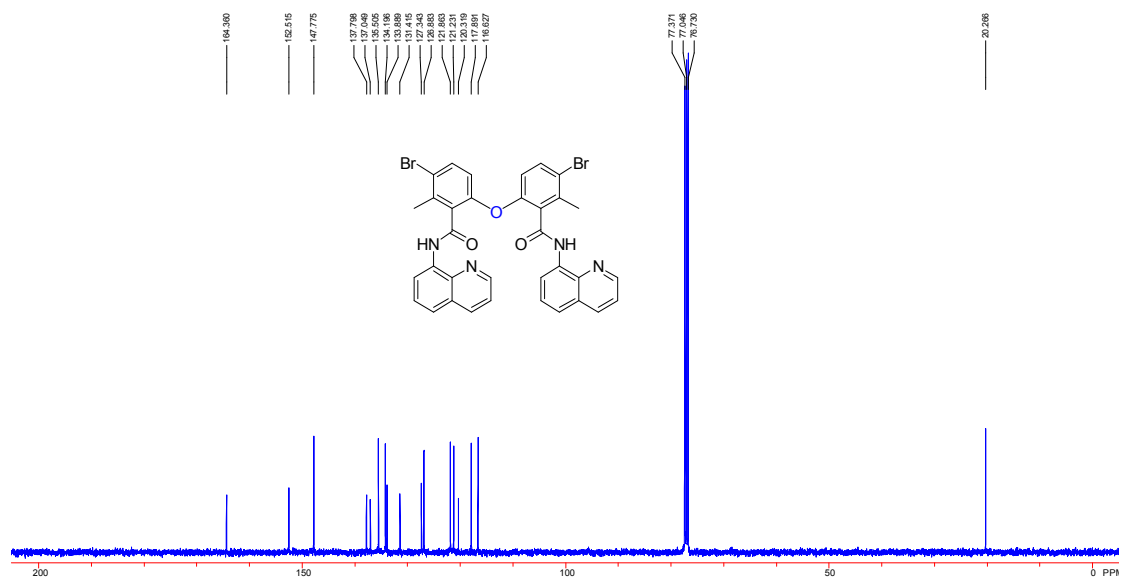

### 6,6'-oxybis(2,4-dimethyl-N-(quinolin-8-yl)benzamide) (2k)

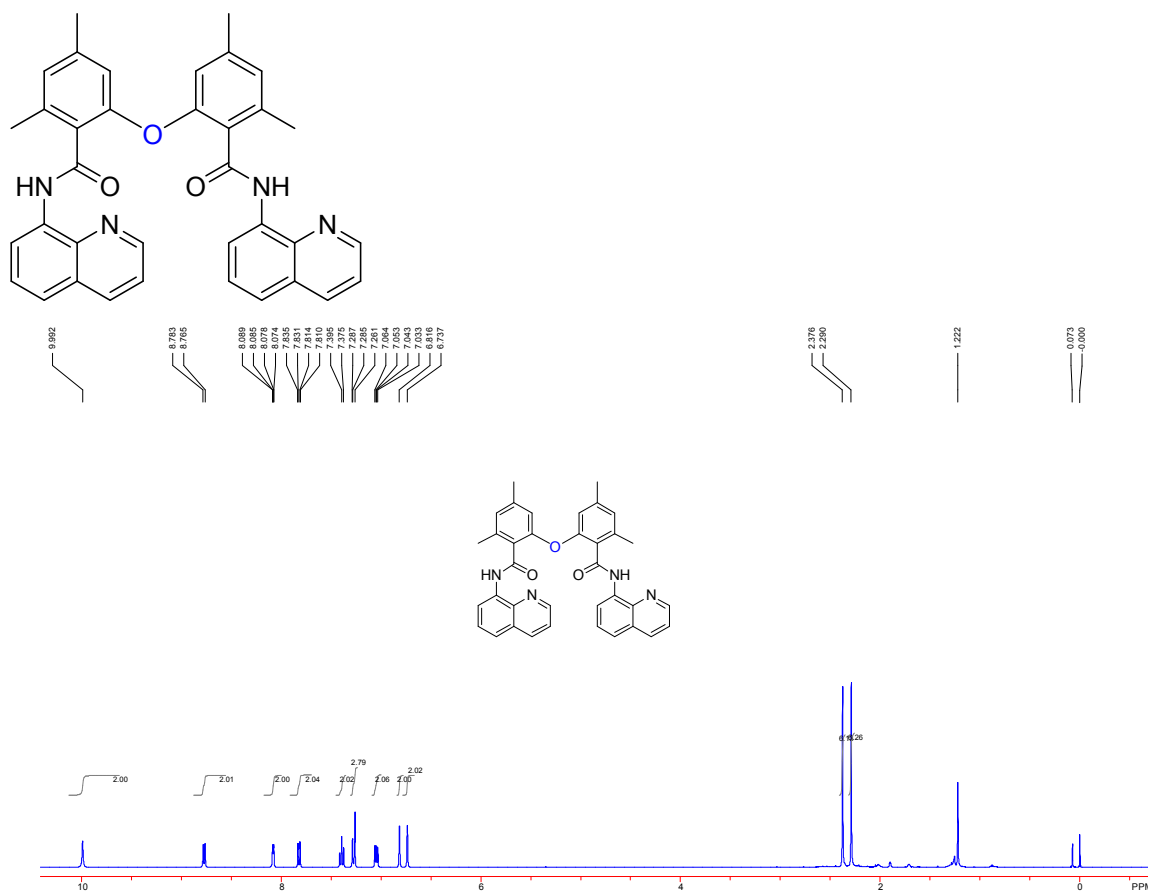

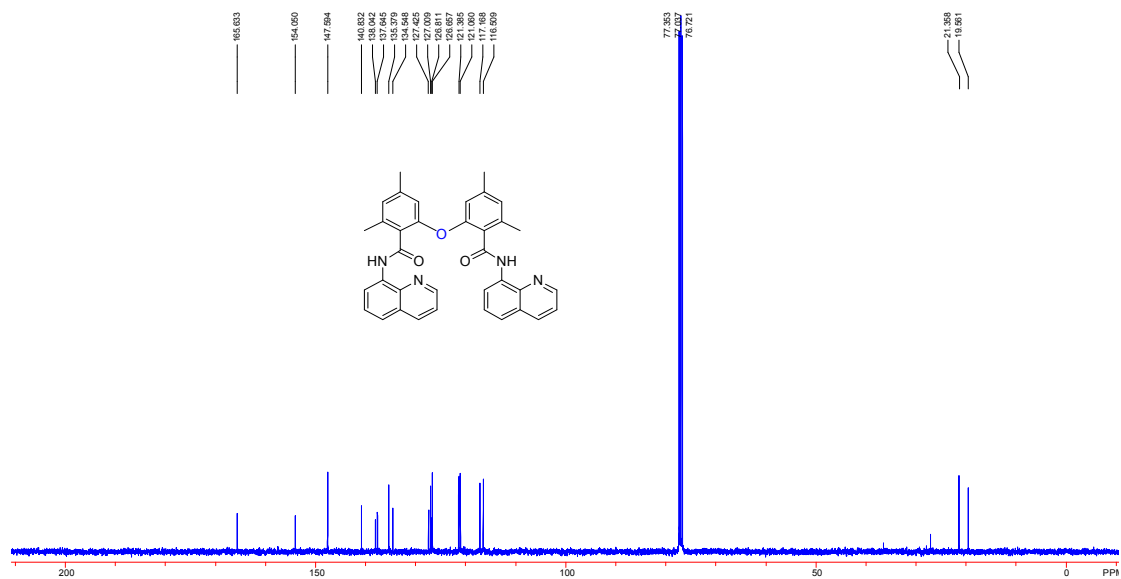

### 6,6'-oxybis(4-methoxy-2-methyl-N-(quinolin-8-yl)benzamide) (2l)

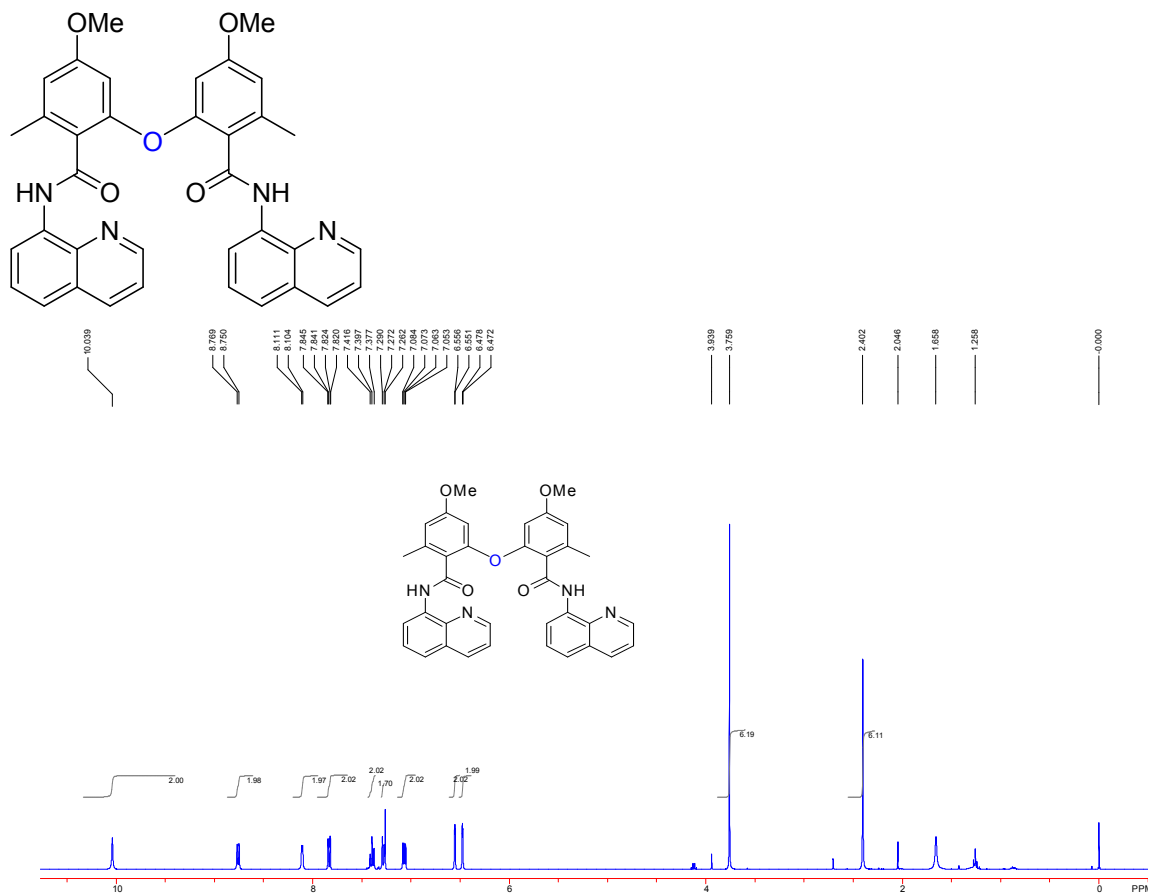

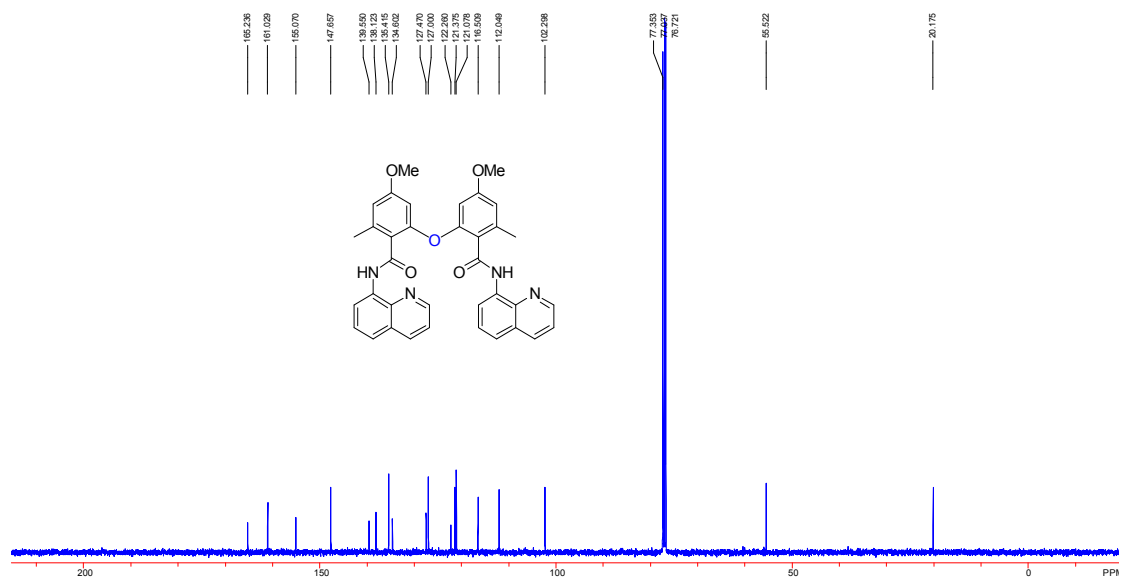

### 6,6'-oxybis(4-fluoro-2-methyl-N-(quinolin-8-yl)benzamide) (2m)

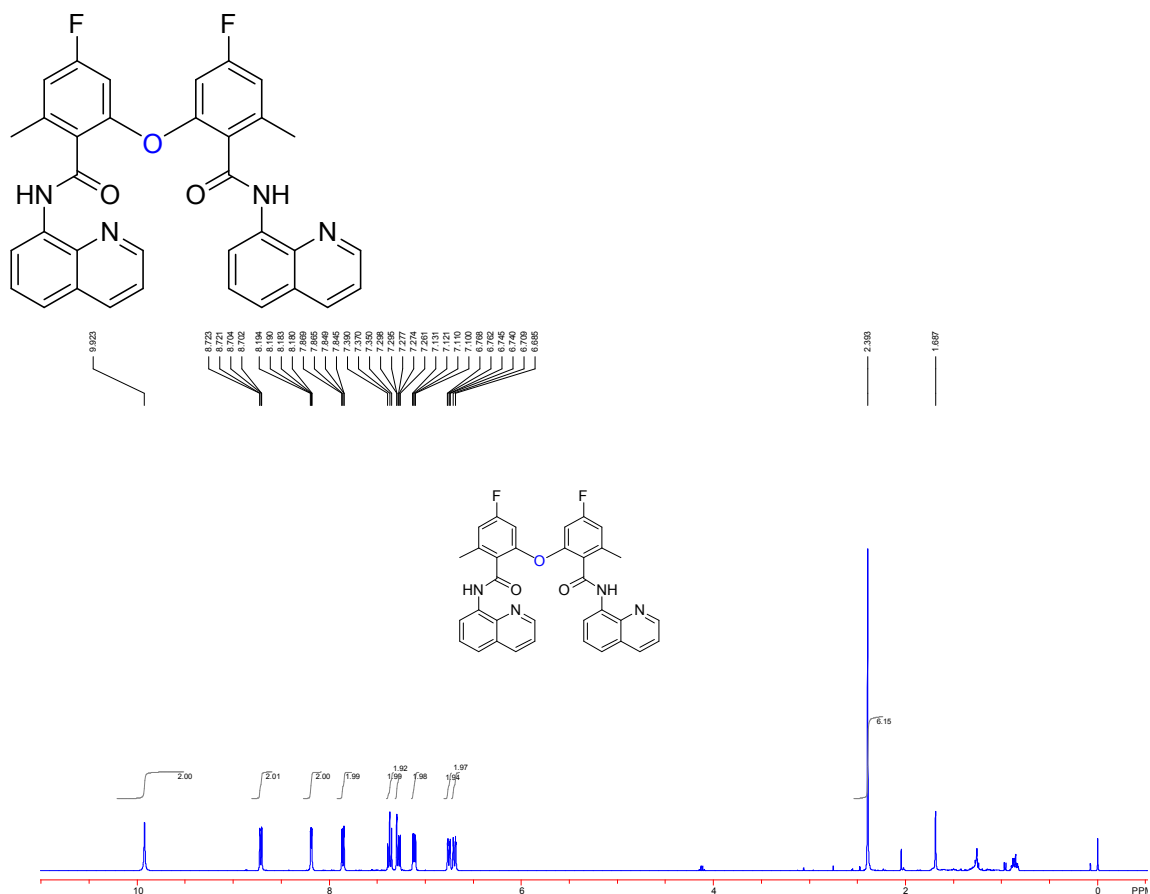

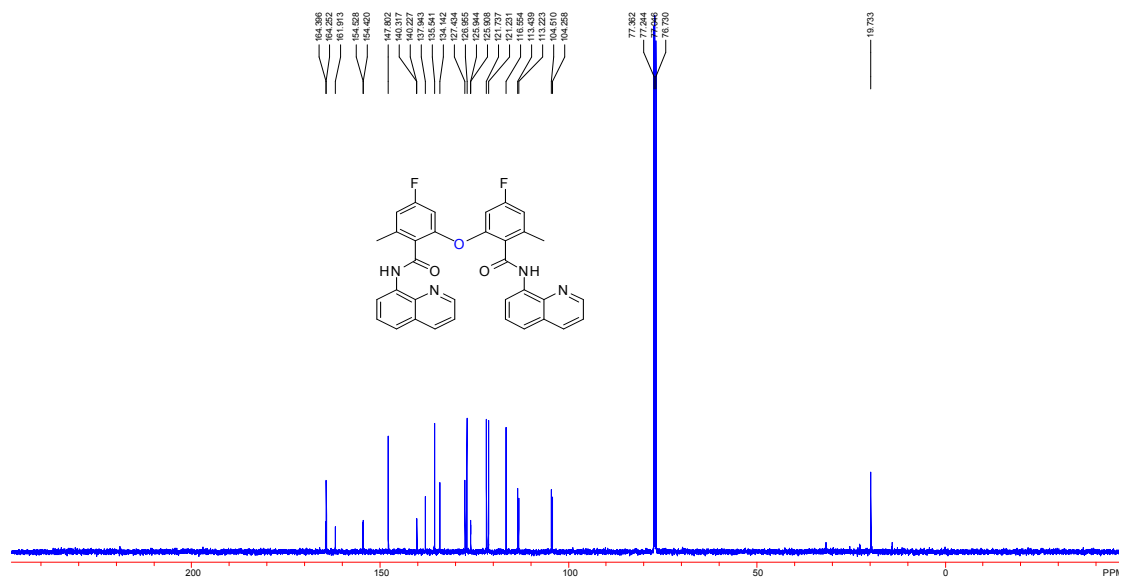

**6,6'-oxybis(4-bromo-2-methyl-N-(quinolin-8-yl)benzamide) (2n)**

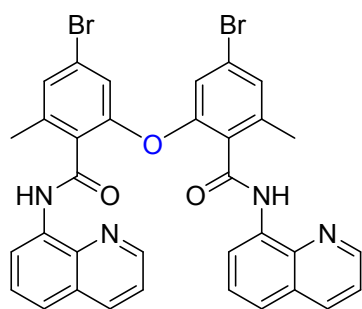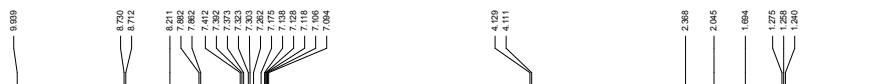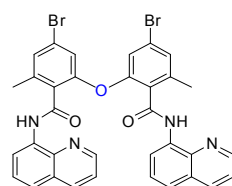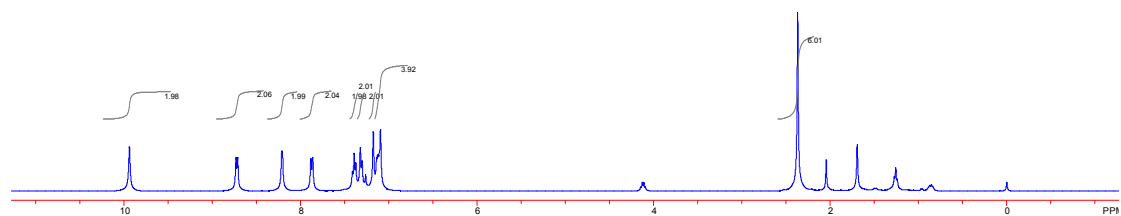

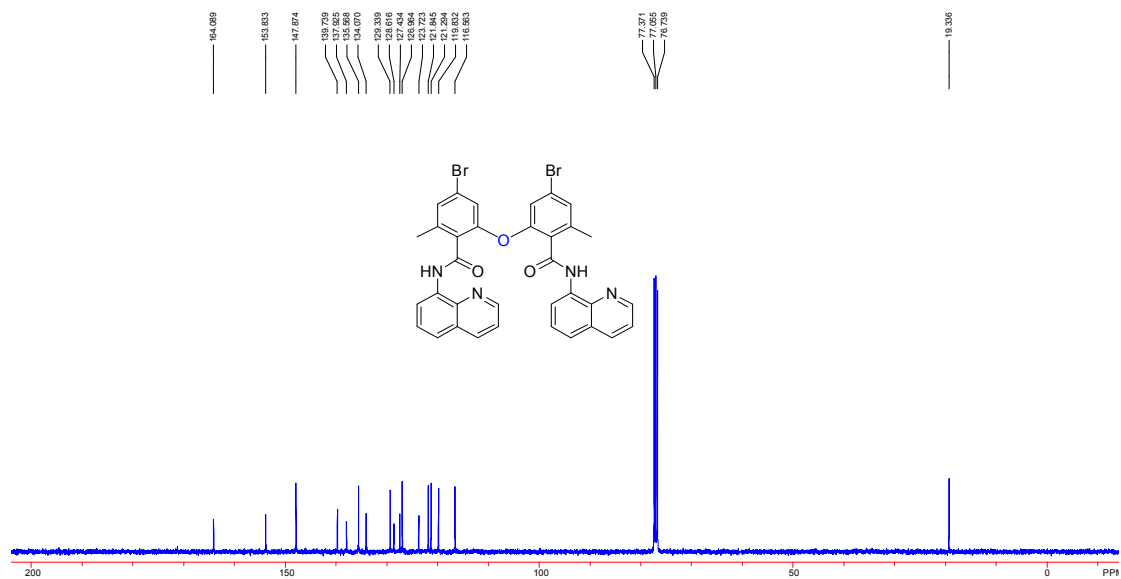

### 6,6'-oxybis(5-fluoro-2-methyl-N-(quinolin-8-yl)benzamide) (2o)

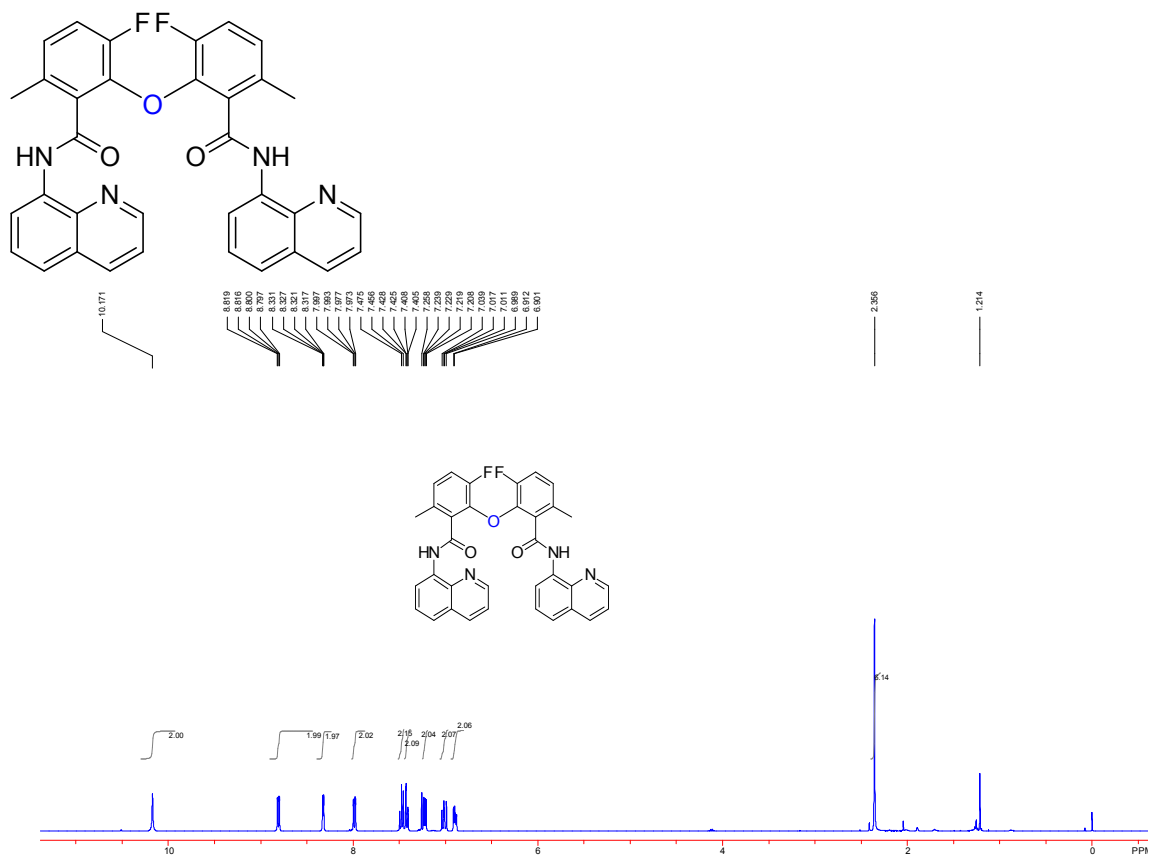

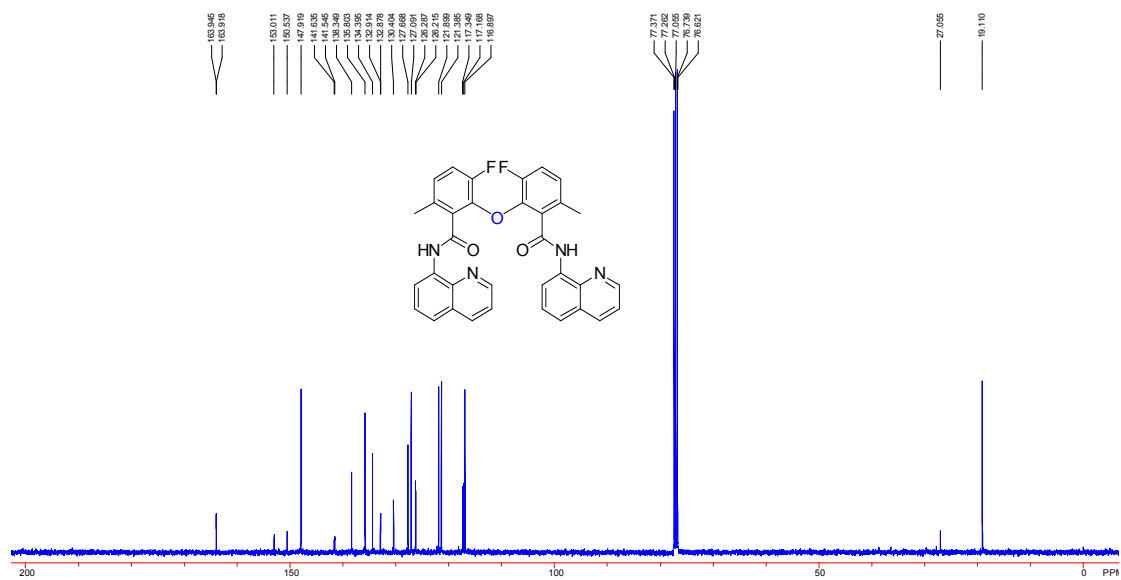

### 6,6'-oxybis(2,3-dichloro-N-(quinolin-8-yl)benzamide) (2p)

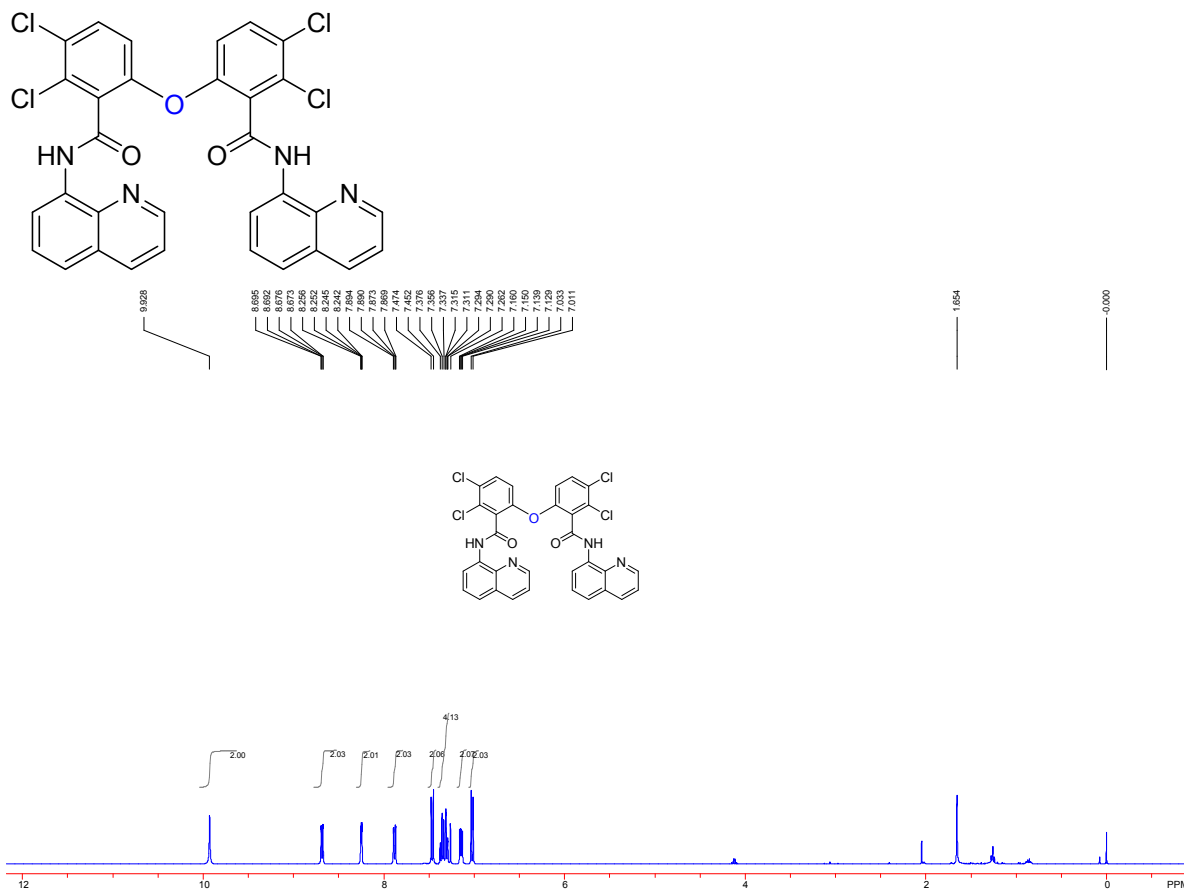

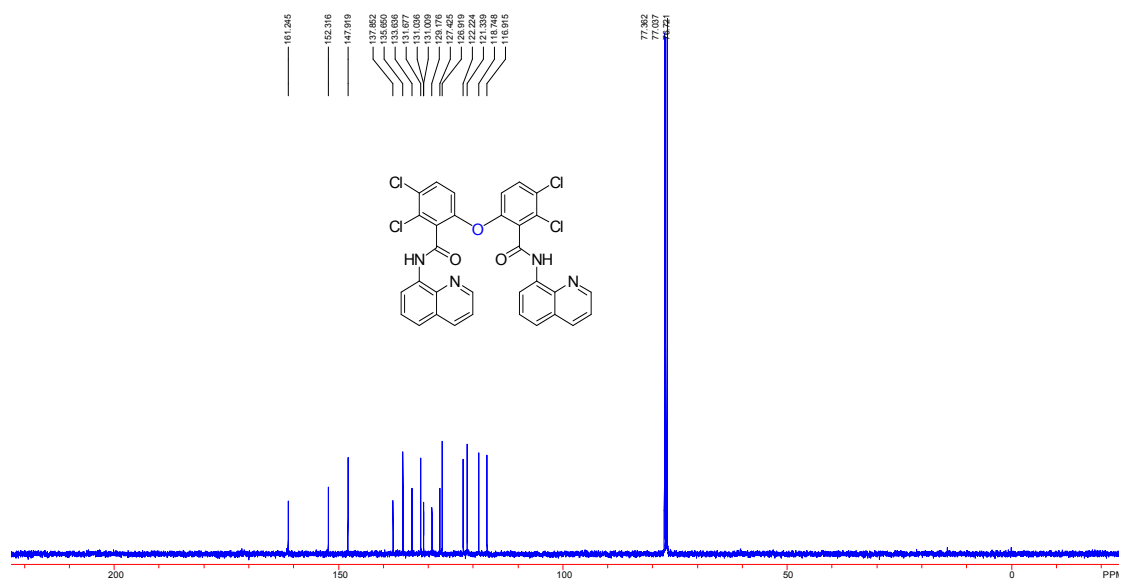

**6,6'-oxybis(2-fluoro-4-methoxy-*N*-(quinolin-8-yl)benzamide) (2q)**

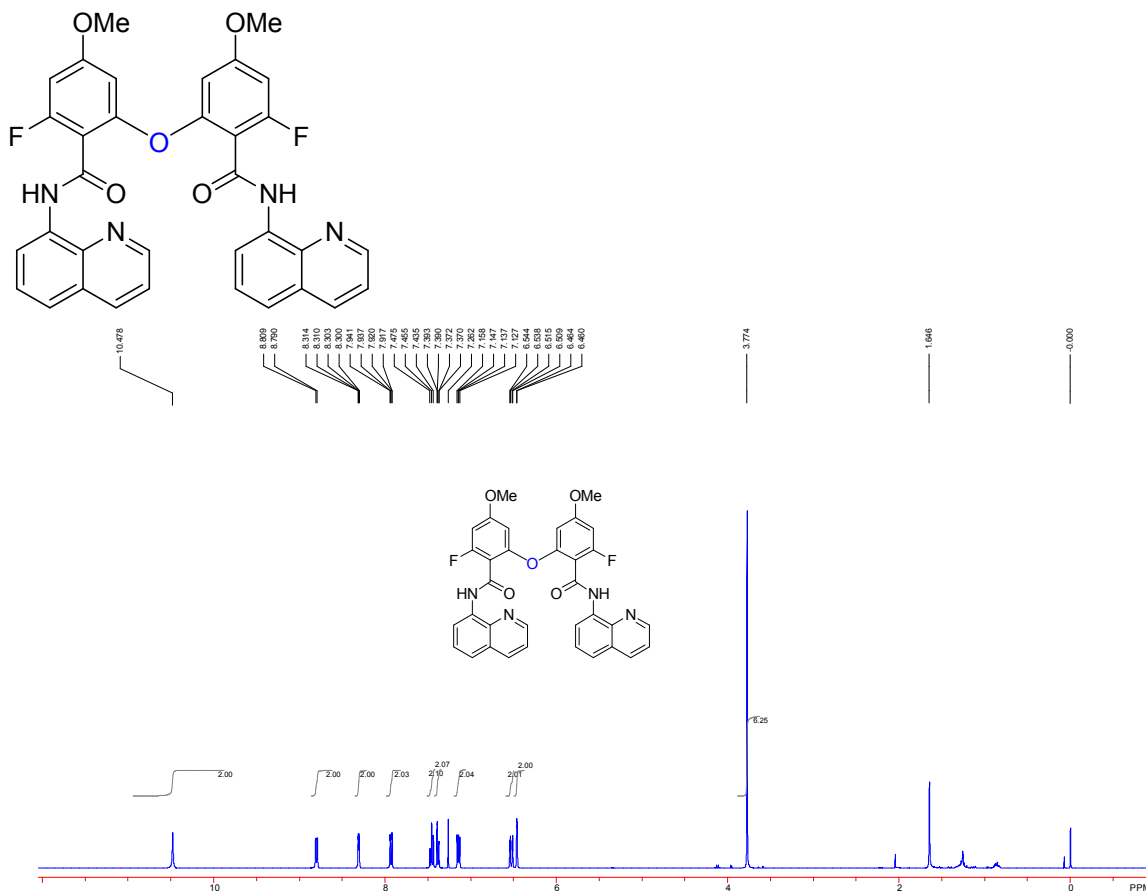

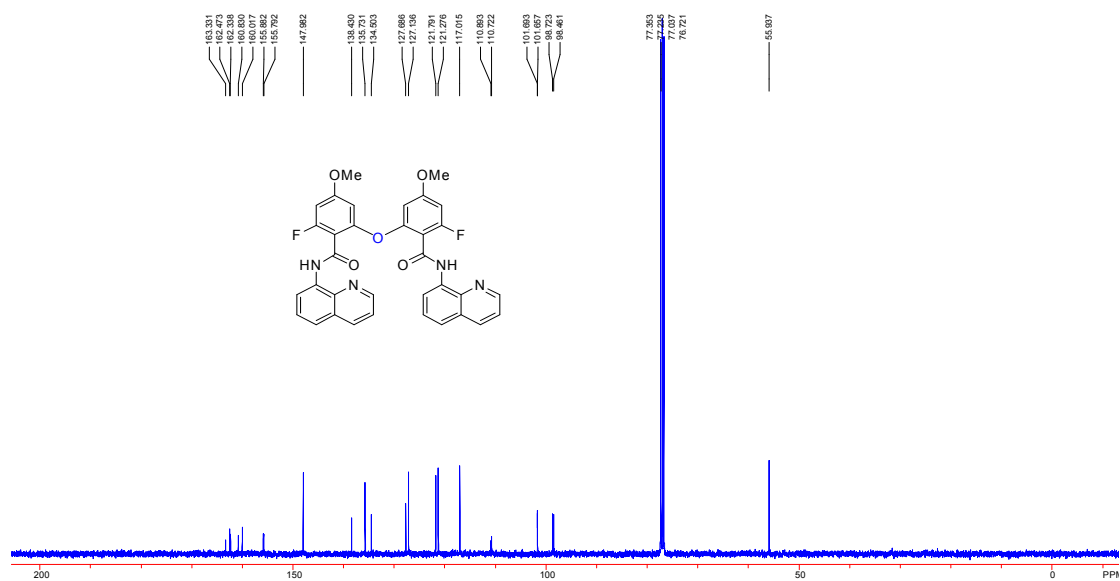

### 2,2'-oxybis(4-methyl-N-(quinolin-8-yl)benzamide) (2r)

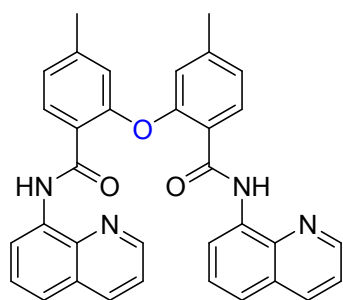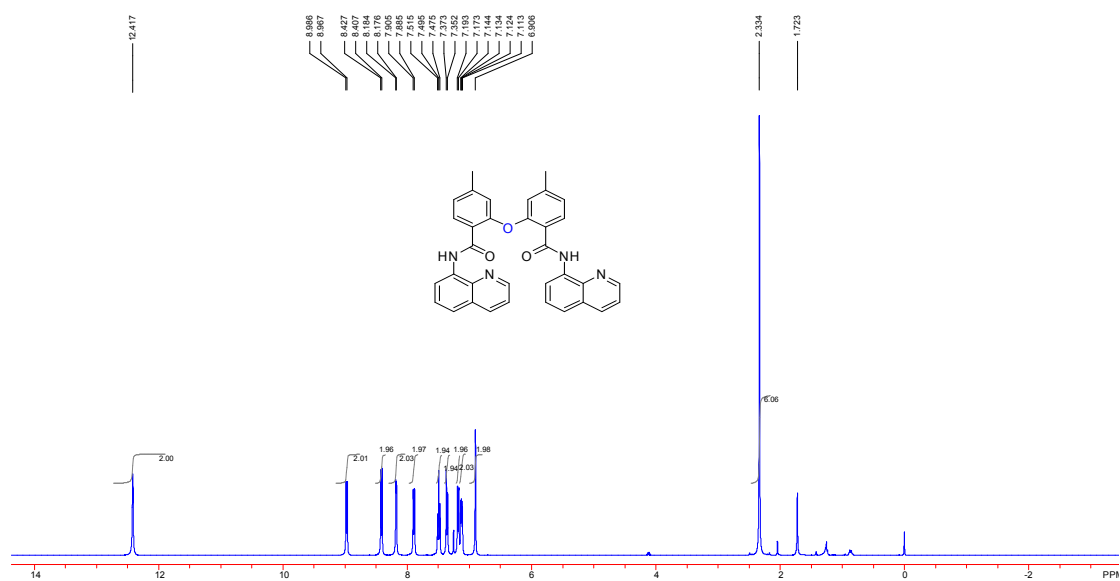





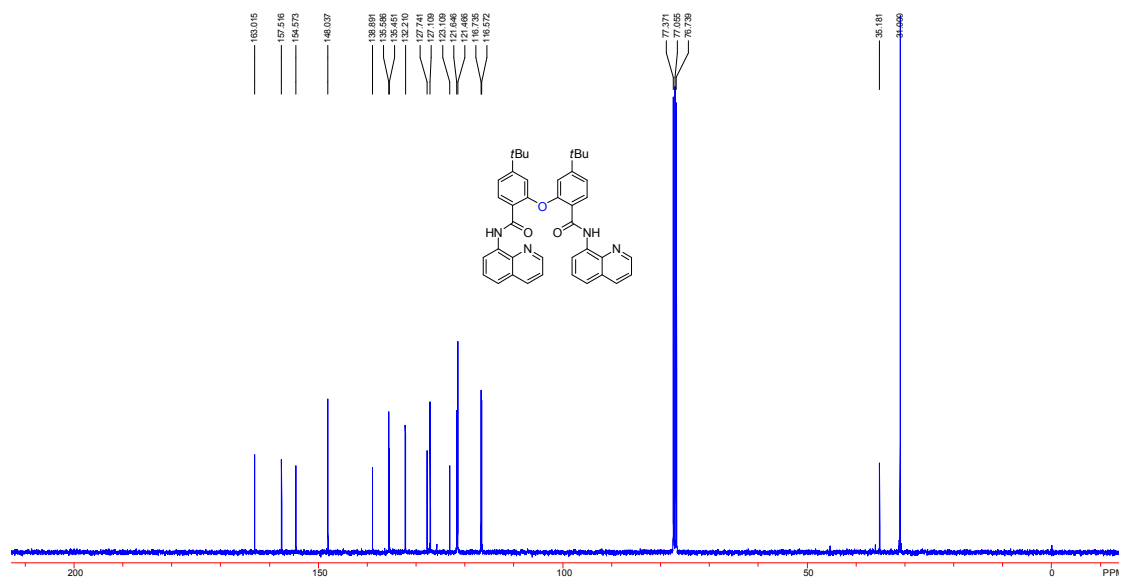

### 3,3'-oxybis(*N*-(quinolin-8-yl)-[1,1'-biphenyl]-4-carboxamide) (2t)

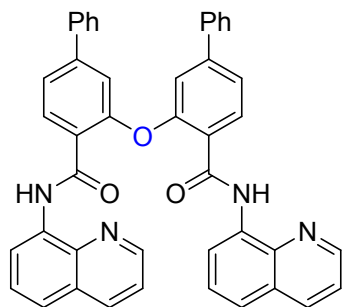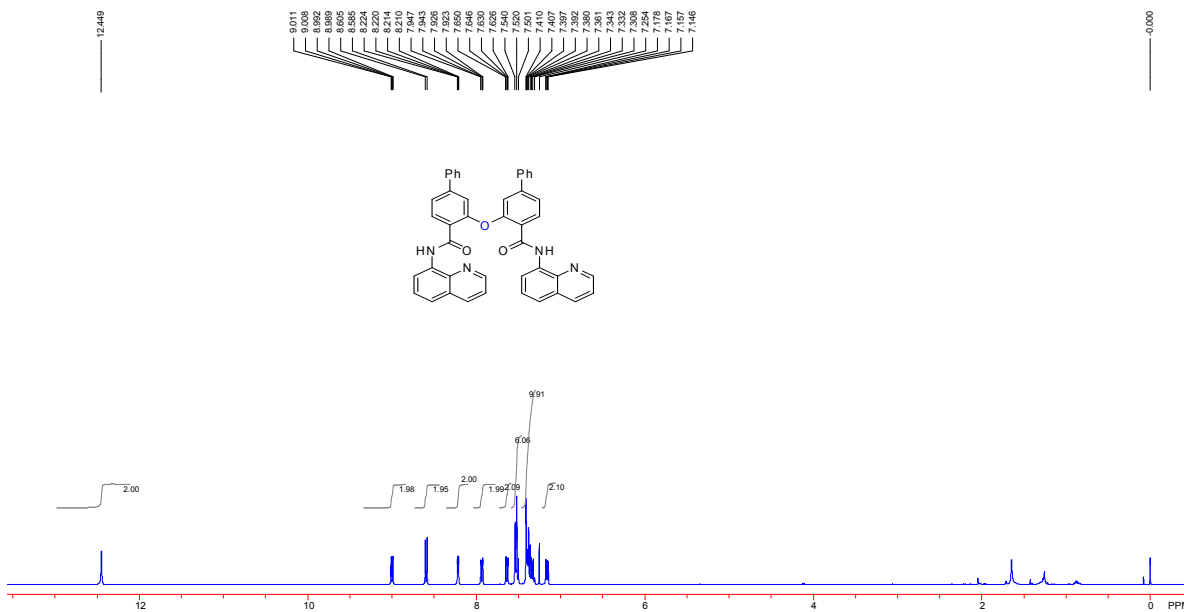

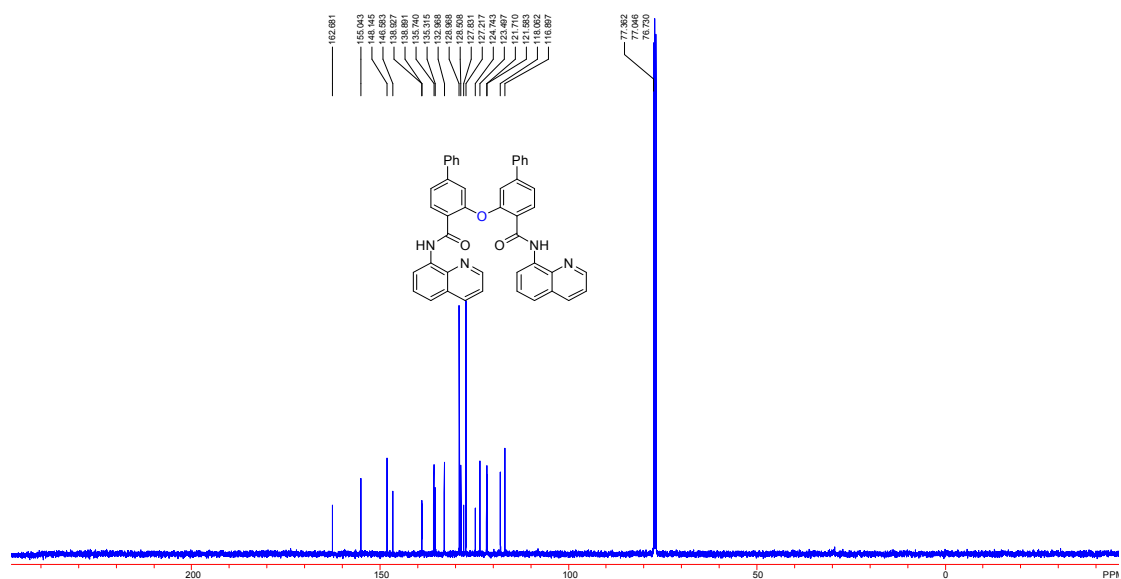

**(2,2'-oxybis(4-methoxy-N-(quinolin-8-yl)benzamide) (2u)**

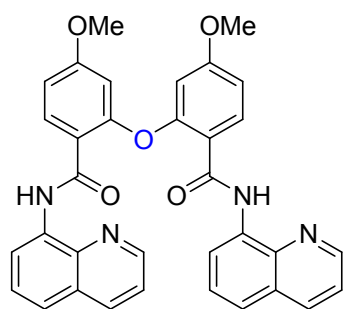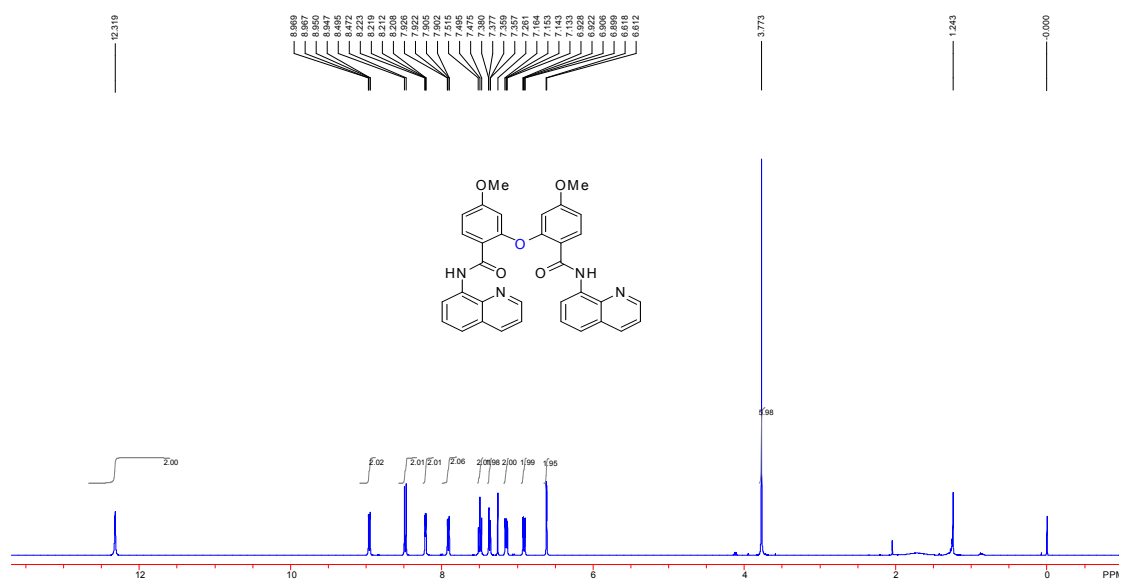

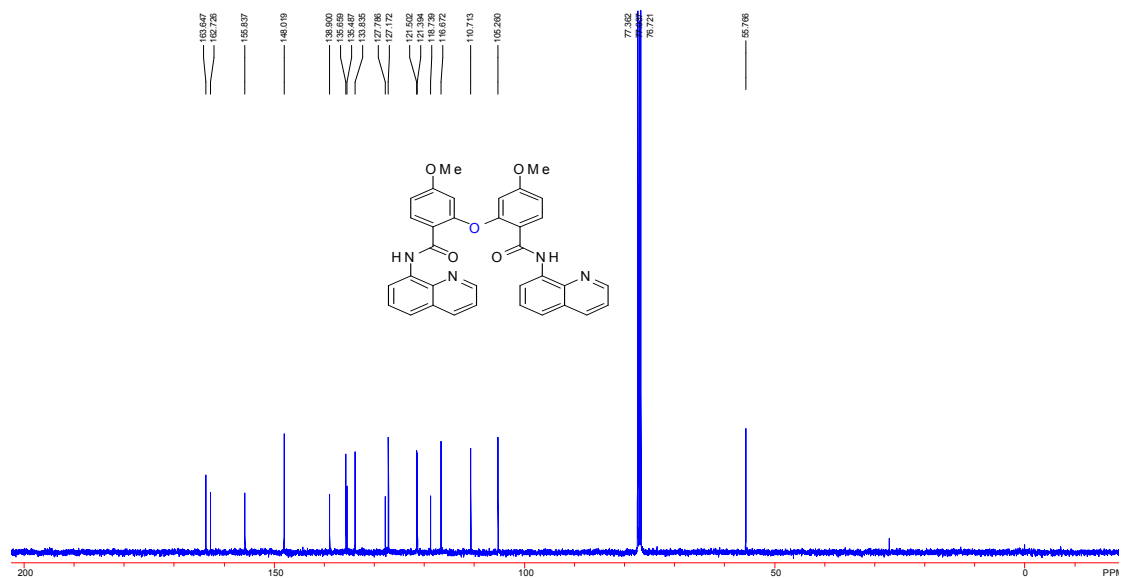

**dimethyl 3,3'-oxybis(4-(quinolin-8-ylcarbamoyl)benzoate) (2v)**

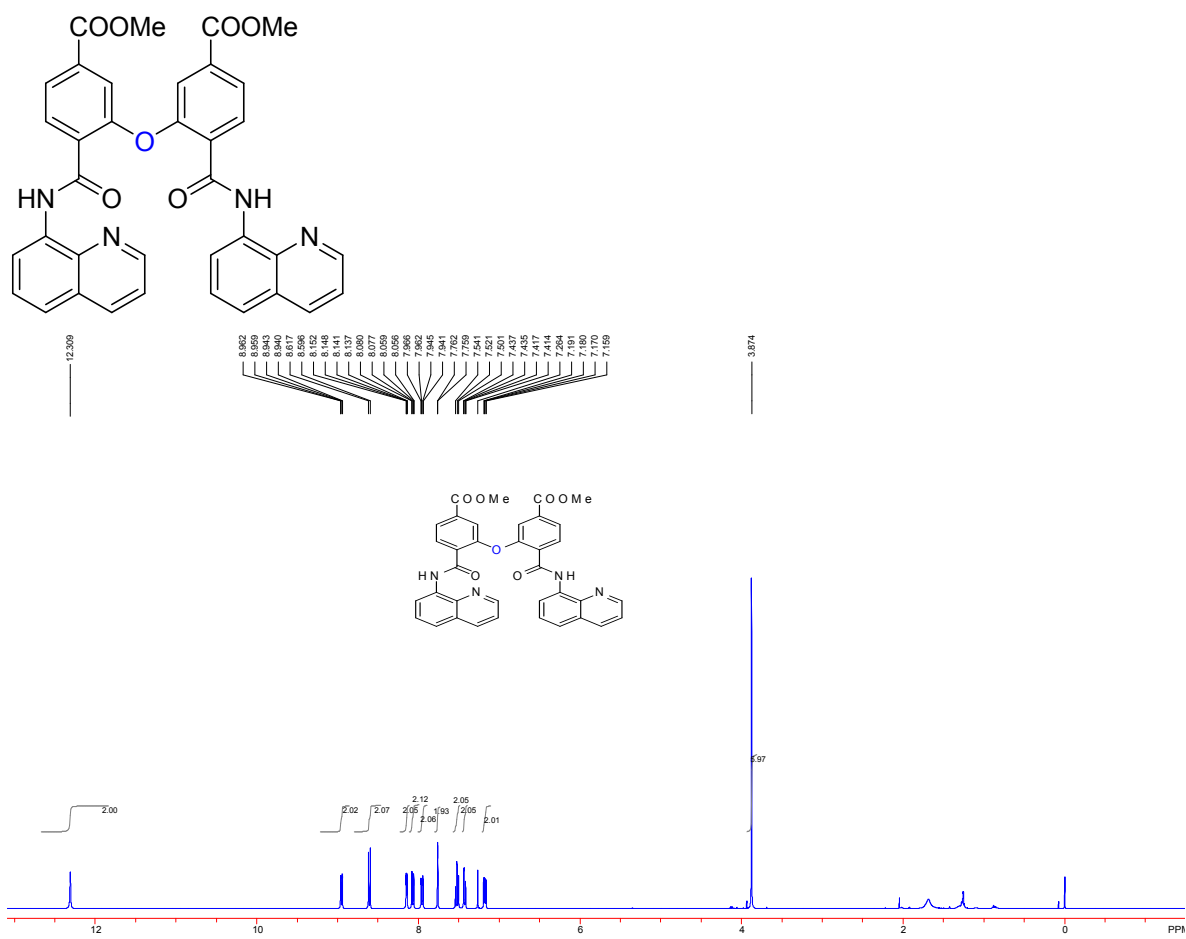

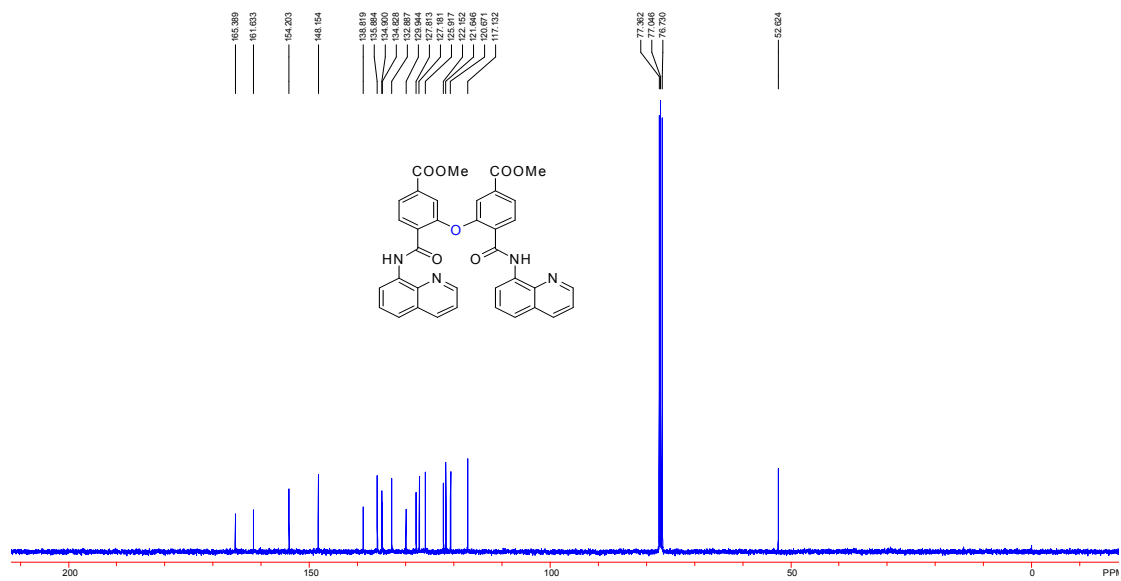

**6,6'-oxybis(3-methyl-N-(quinolin-8-yl)benzamide) (2w)**

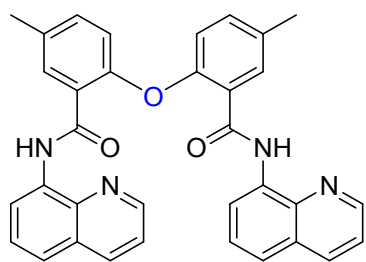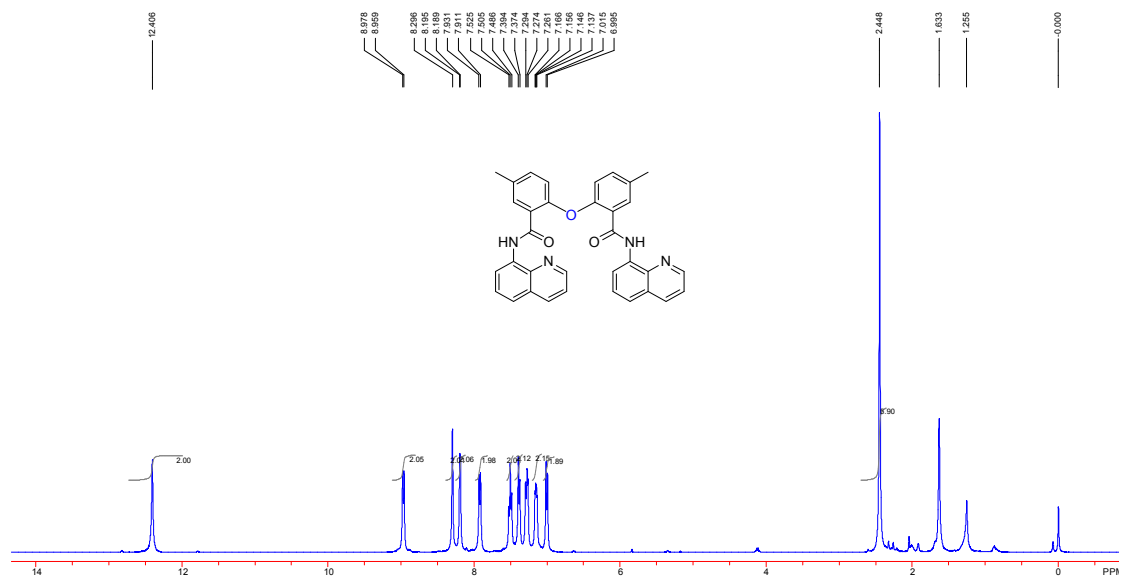

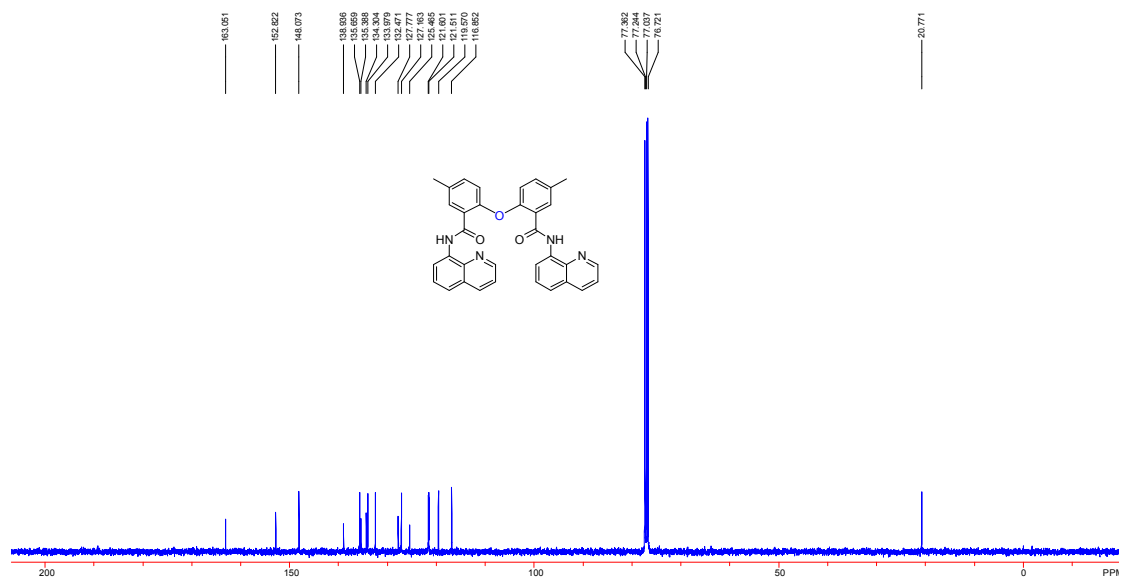

**4,4'-oxybis(*N*-(quinolin-8-yl)-[1,1'-biphenyl]-3-carboxamide) (2x)**

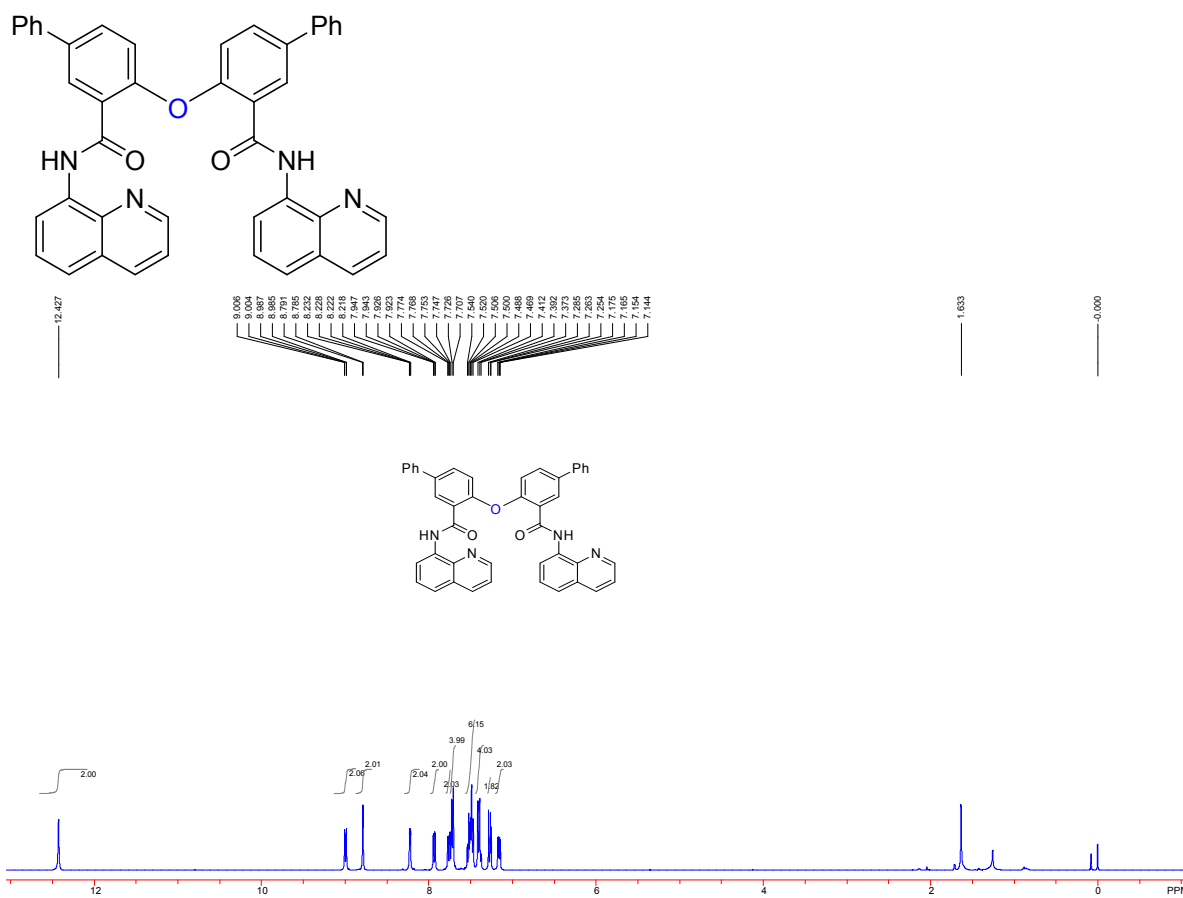

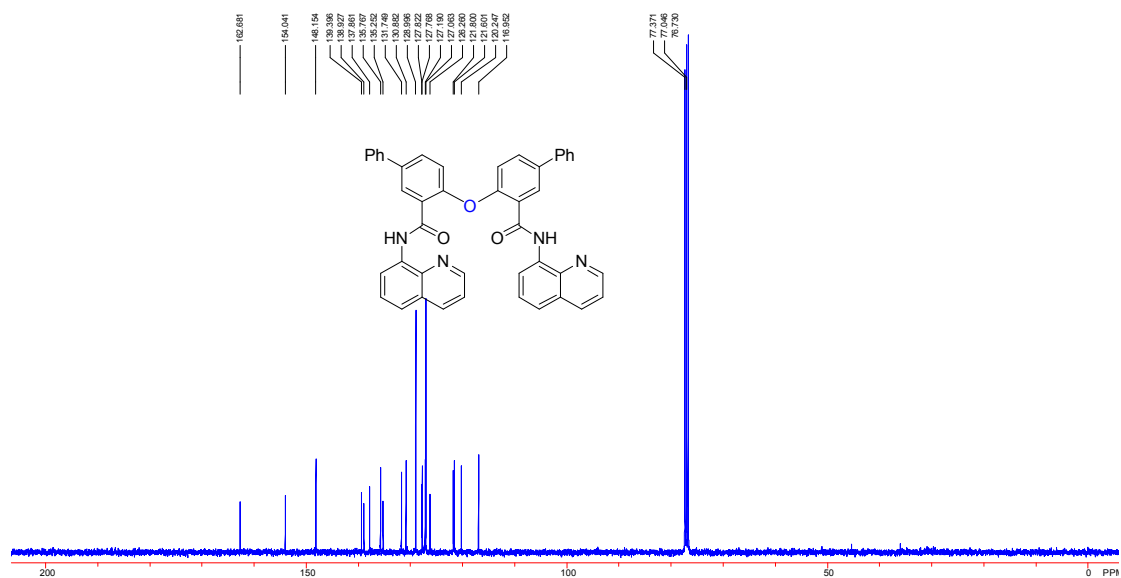

### 6,6'-oxybis(3-methoxy-N-(quinolin-8-yl)benzamide) (2y)

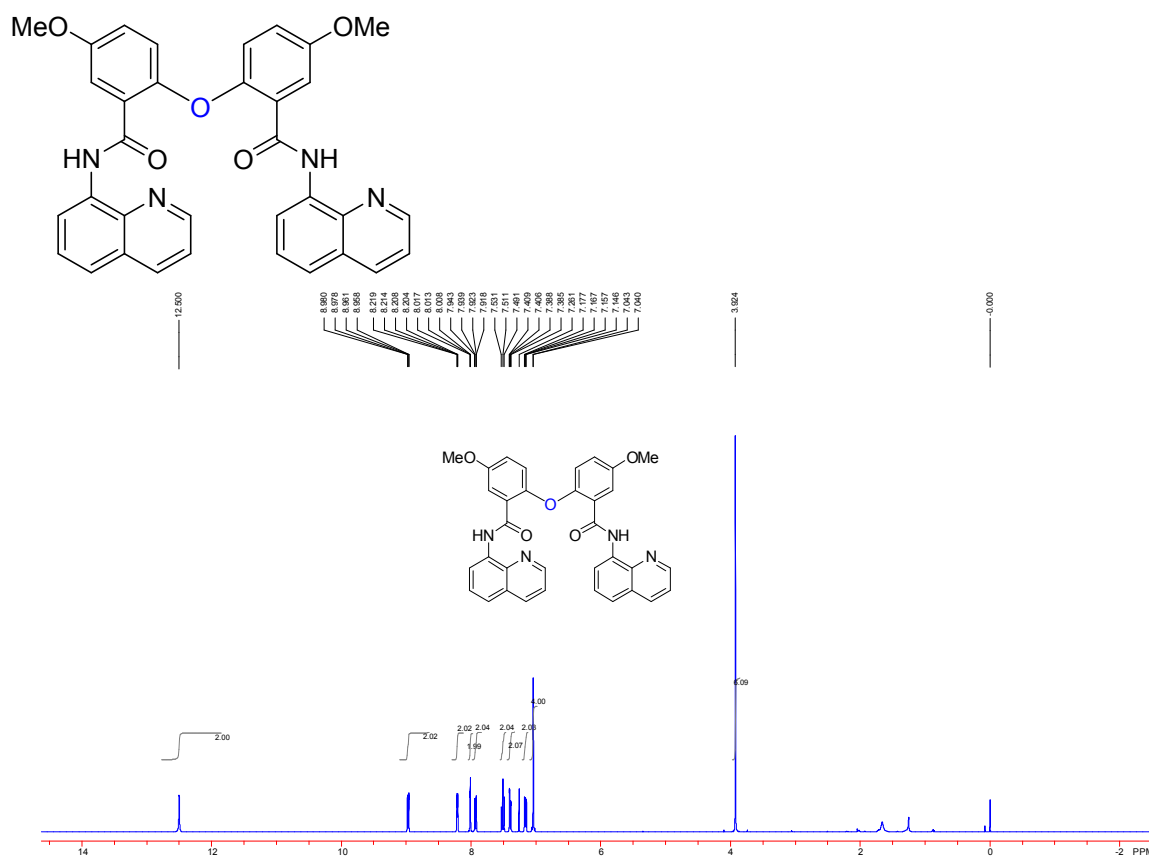

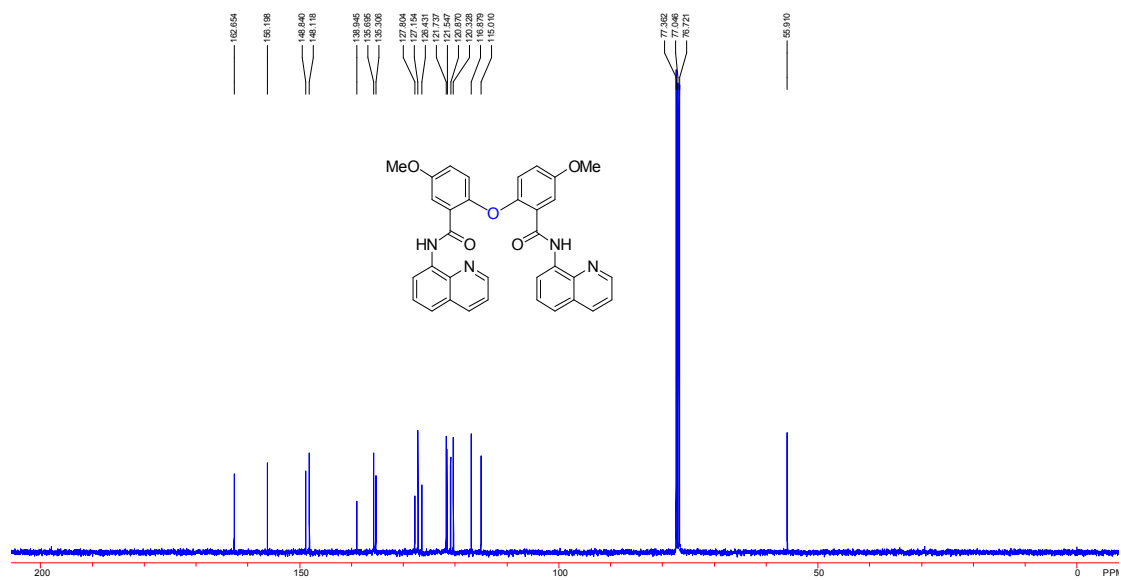

**6,6'-oxybis(3-fluoro-N-(quinolin-8-yl)benzamide) (2z)**

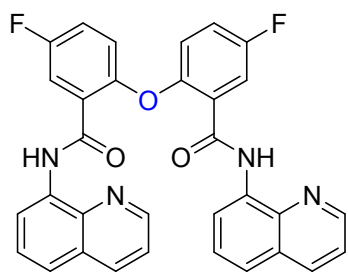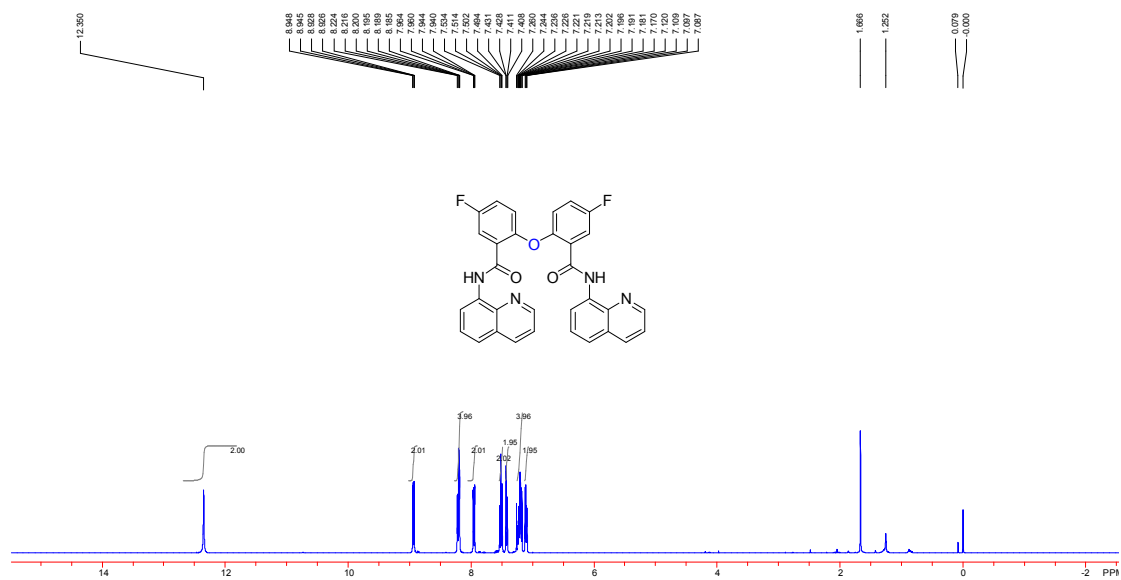



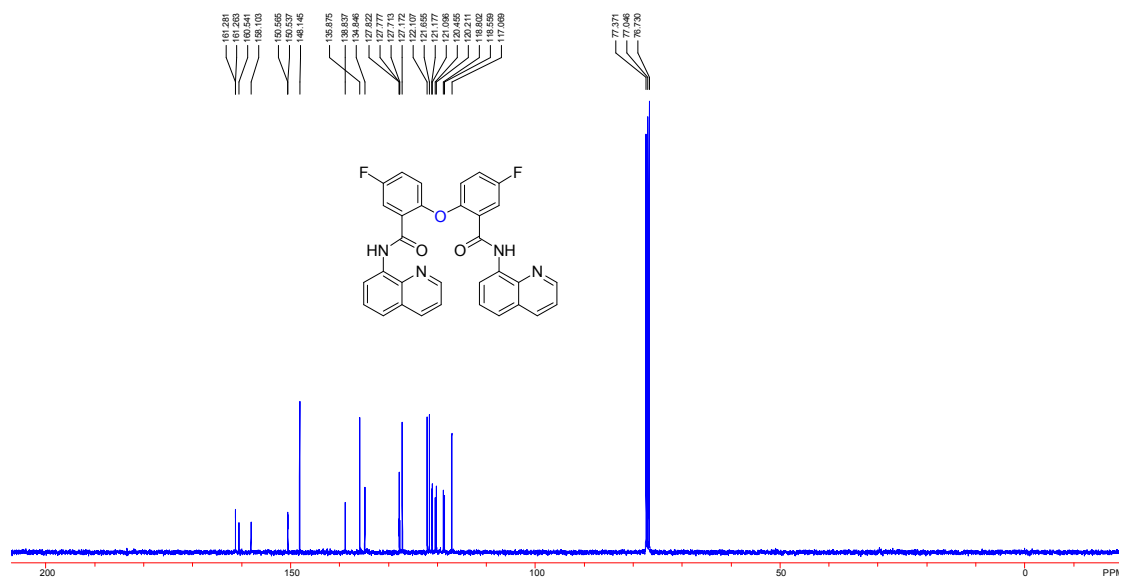

**6,6'-oxybis(3-chloro-N-(quinolin-8-yl)benzamide) (2aa)**

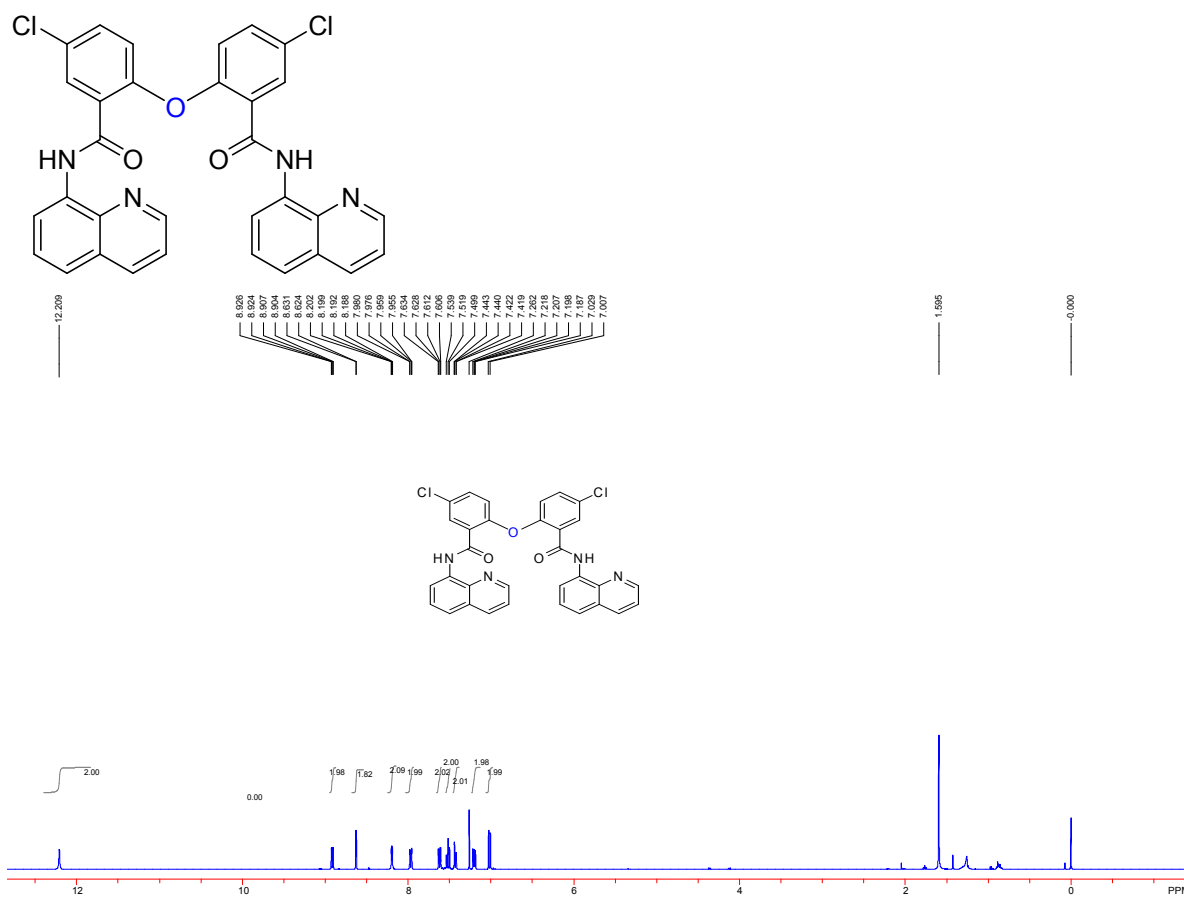

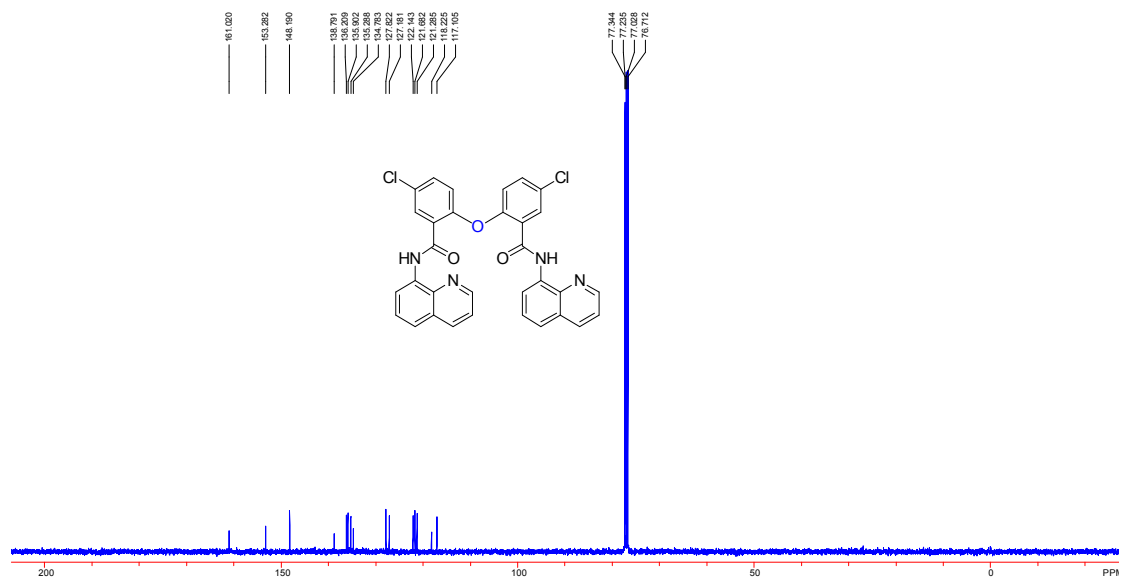

### 6,6'-oxybis(3-iodo-N-(quinolin-8-yl)benzamide) (2ab)

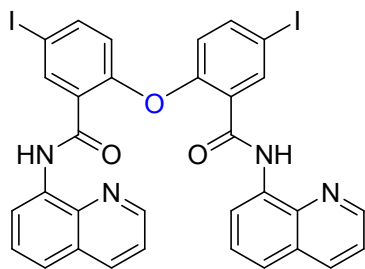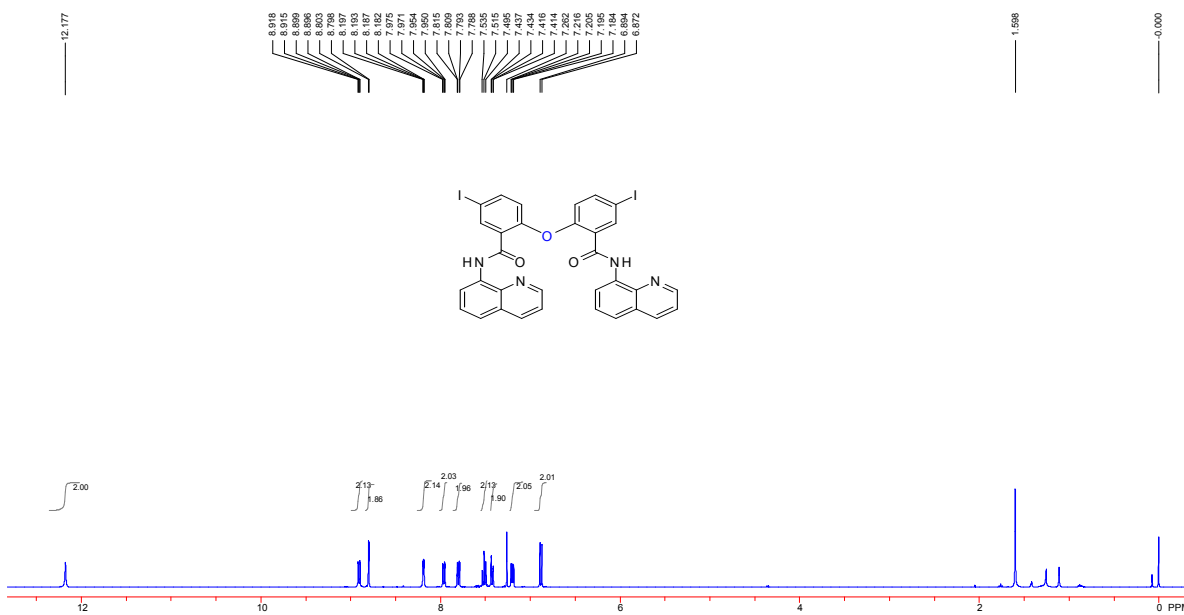



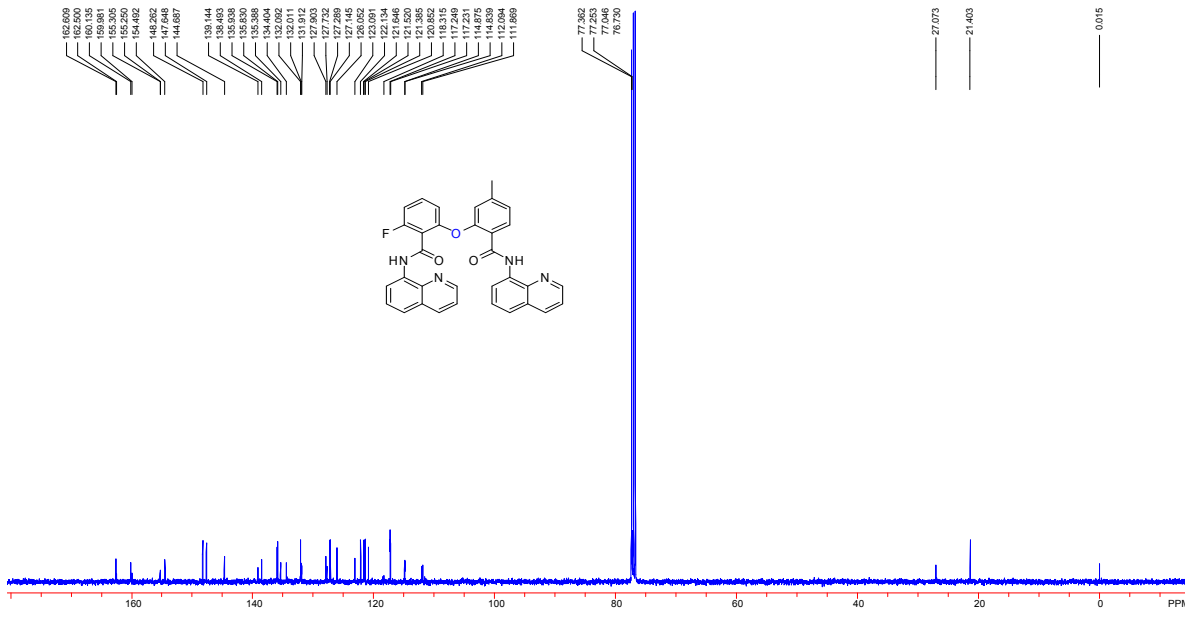

**4-methyl-N-(quinolin-8-yl)-2-(2-(quinolin-8-ylcarbamoyl)-3-(trifluoromethyl)phenoxy)benzamide (3b)**

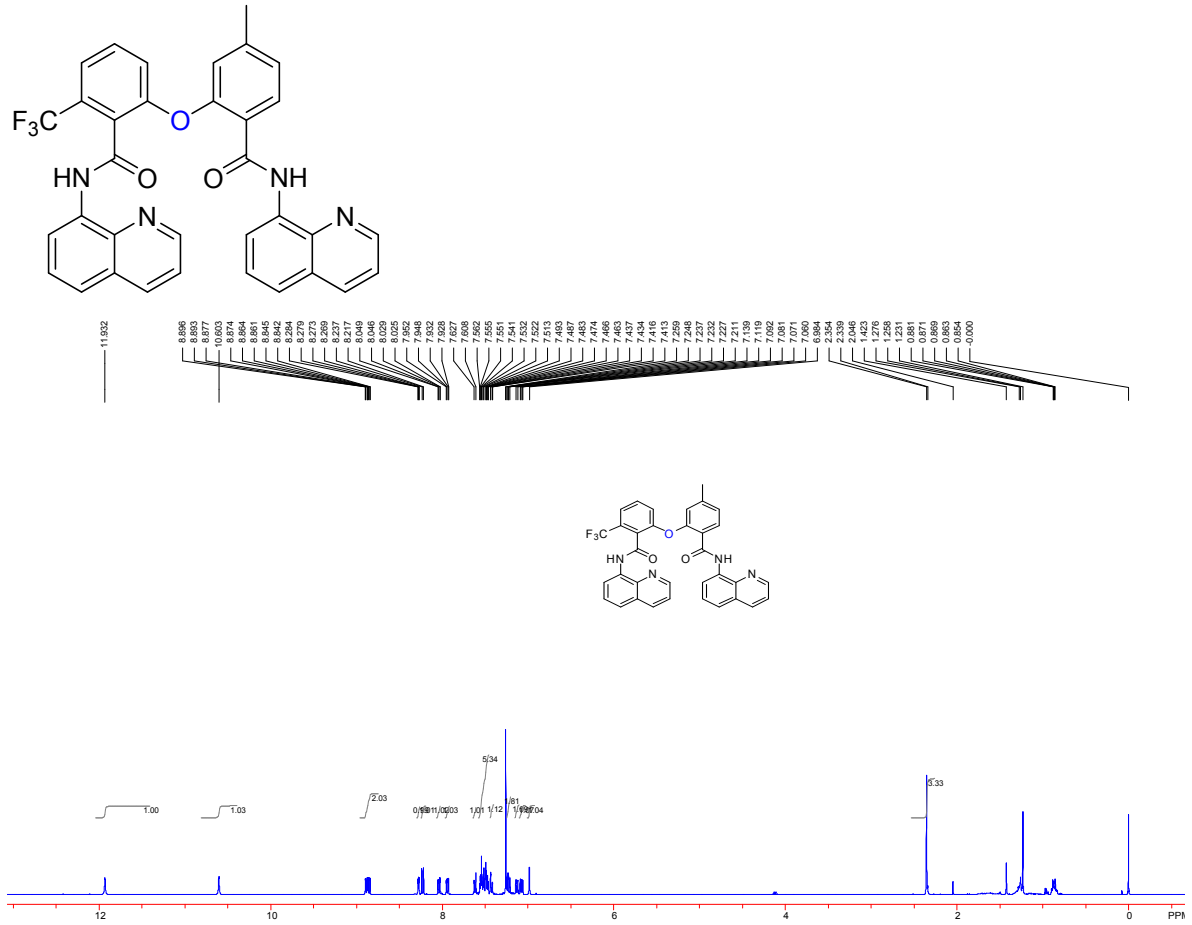



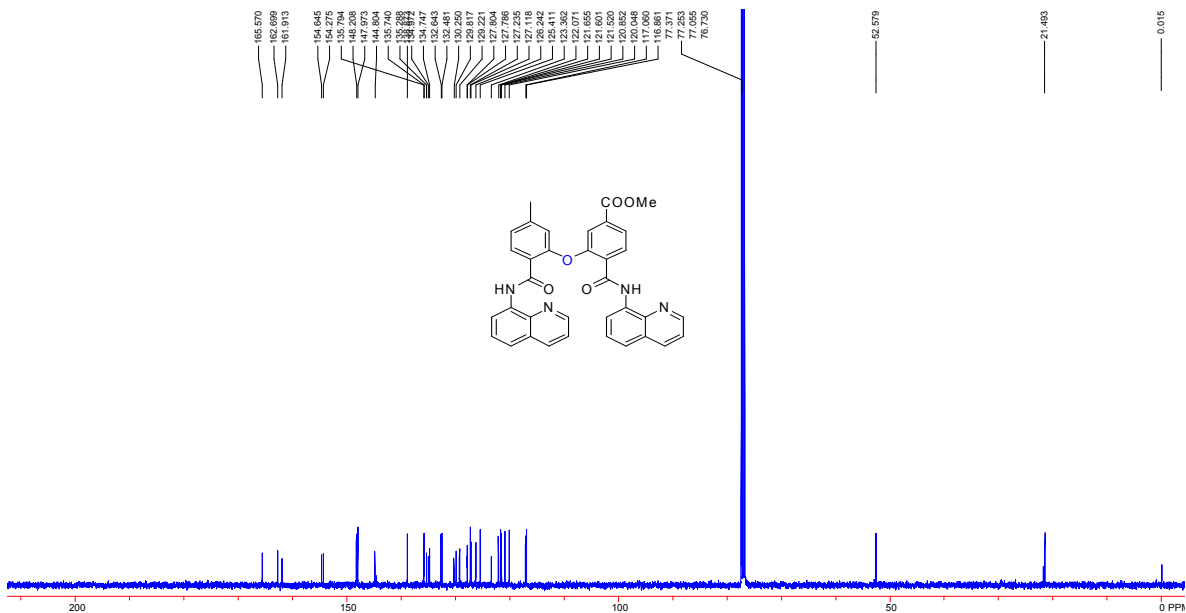

**4-methyl-2-(3-methyl-2-(quinolin-8-ylcarbamoyl)phenoxy)-N-(quinolin-8-yl)benzamide (3d)**

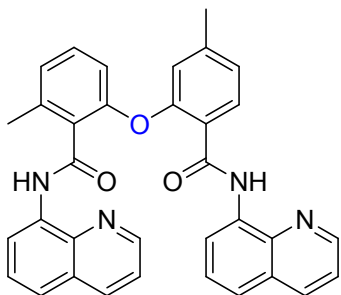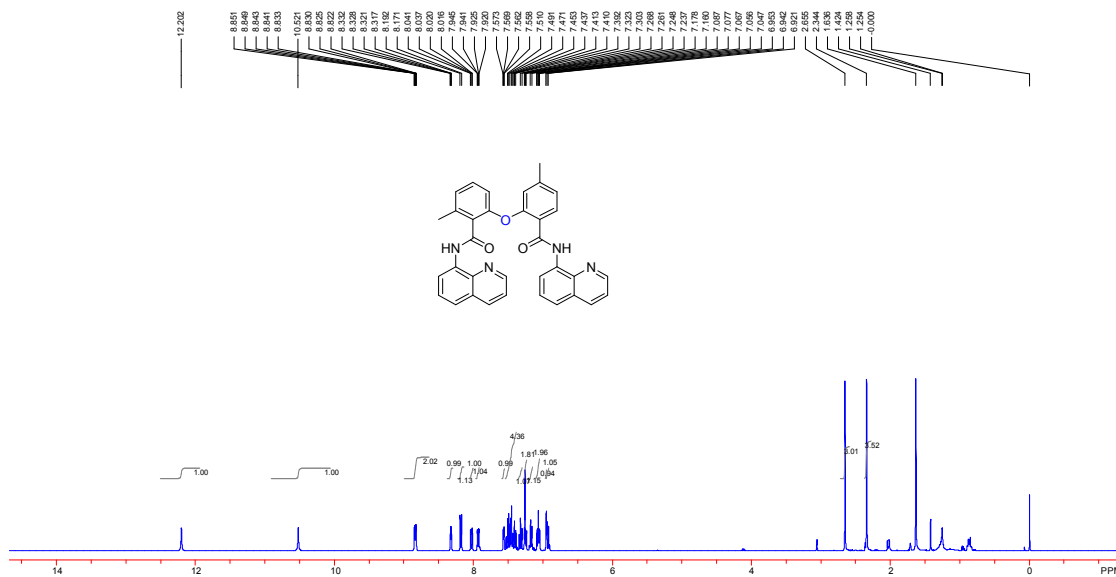

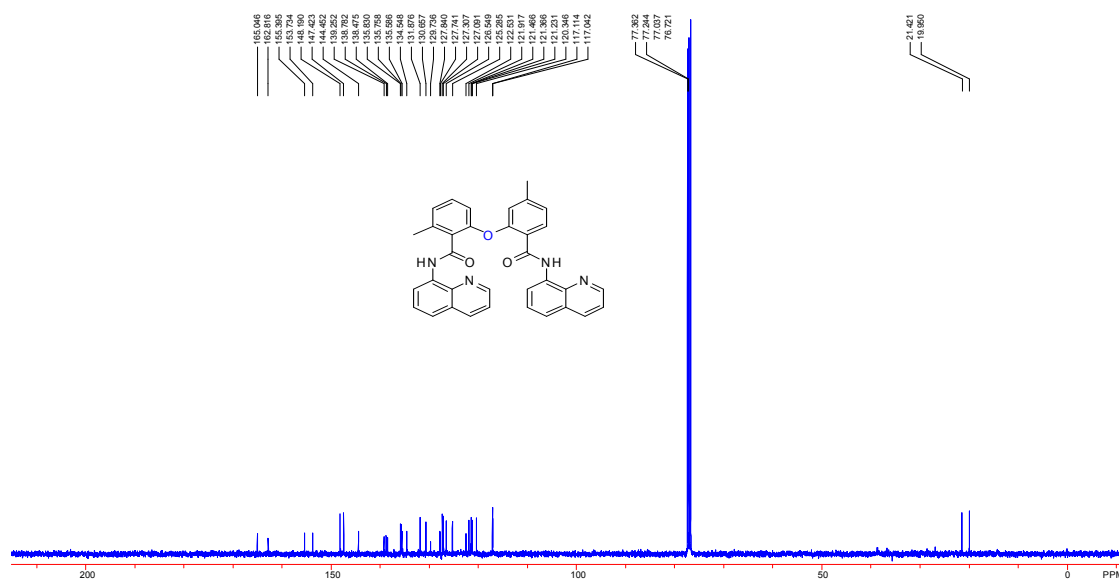

**3-(5-methyl-2-(quinolin-8-ylcarbamoyl)phenoxy)-N-(quinolin-8-yl)-[1,1'-biphenyl]-2-carboxamide (3e)**

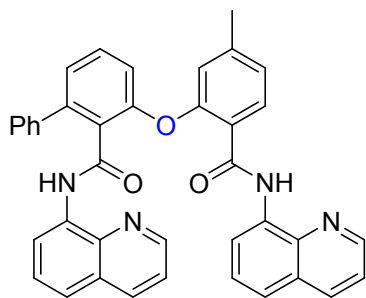

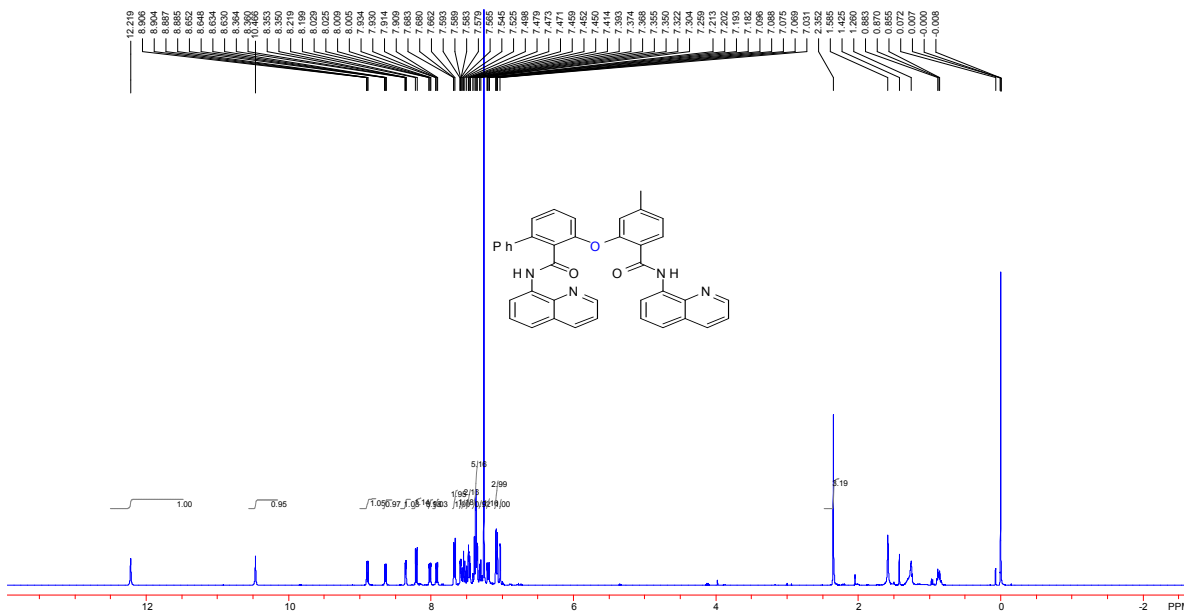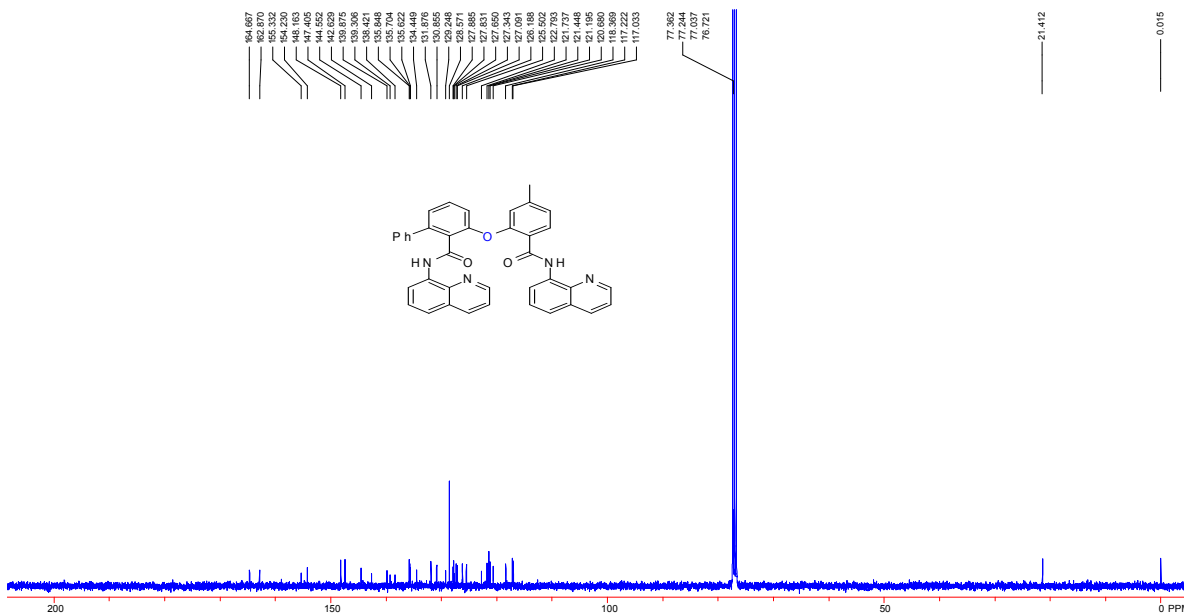

**3-(3-methyl-2-(quinolin-8-ylcarbamoyl)phenoxy)-N-(quinolin-8-yl)-[1,1'-biphenyl]-4-carboxamide (3f)**

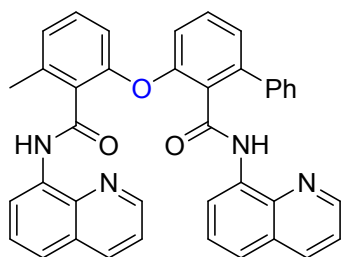



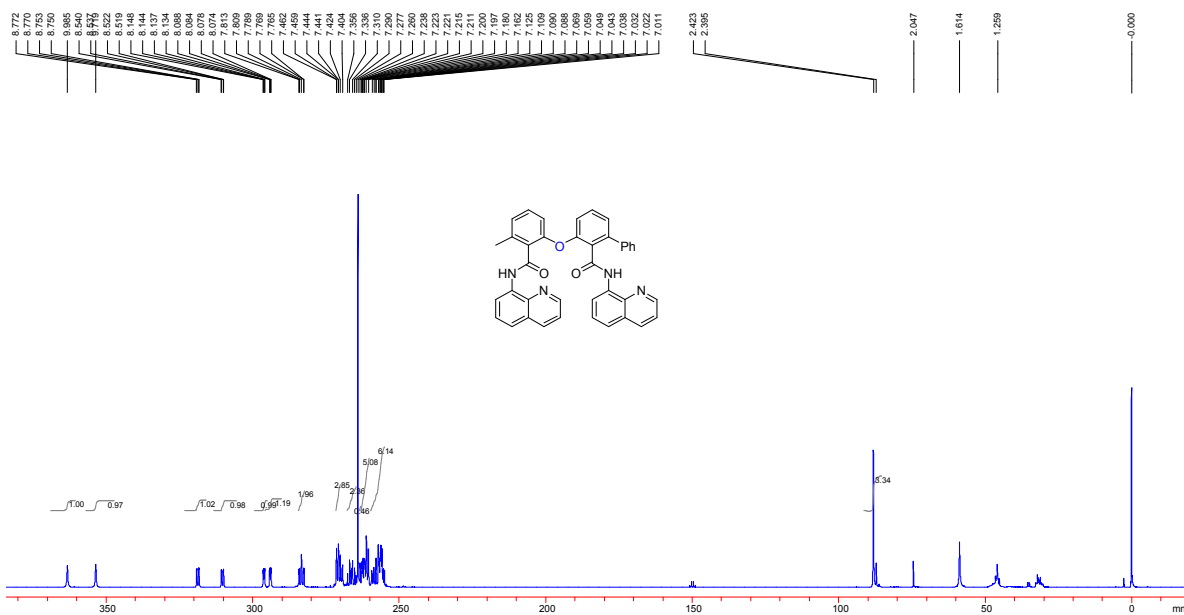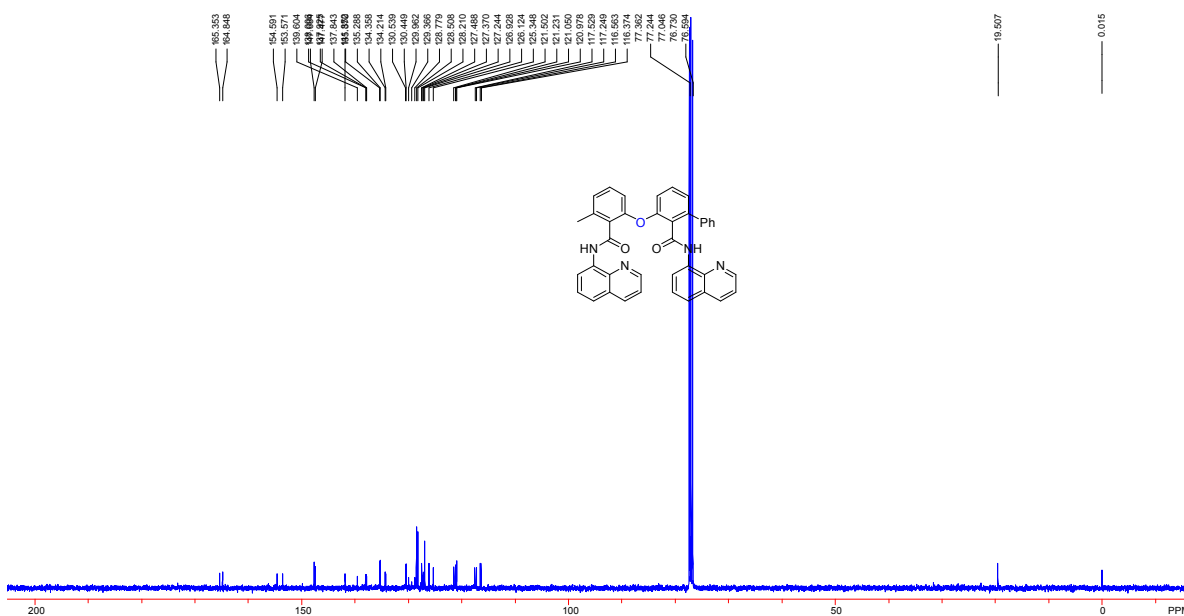

**4-methoxy-2-(5-methyl-2-(quinolin-8-ylcarbamoyl)phenoxy)-N-(quinolin-8-yl)benzamide (3g)**

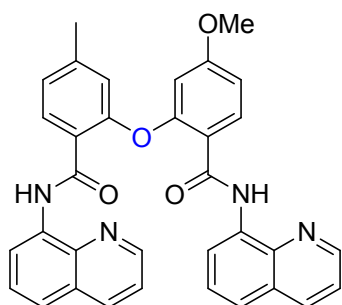

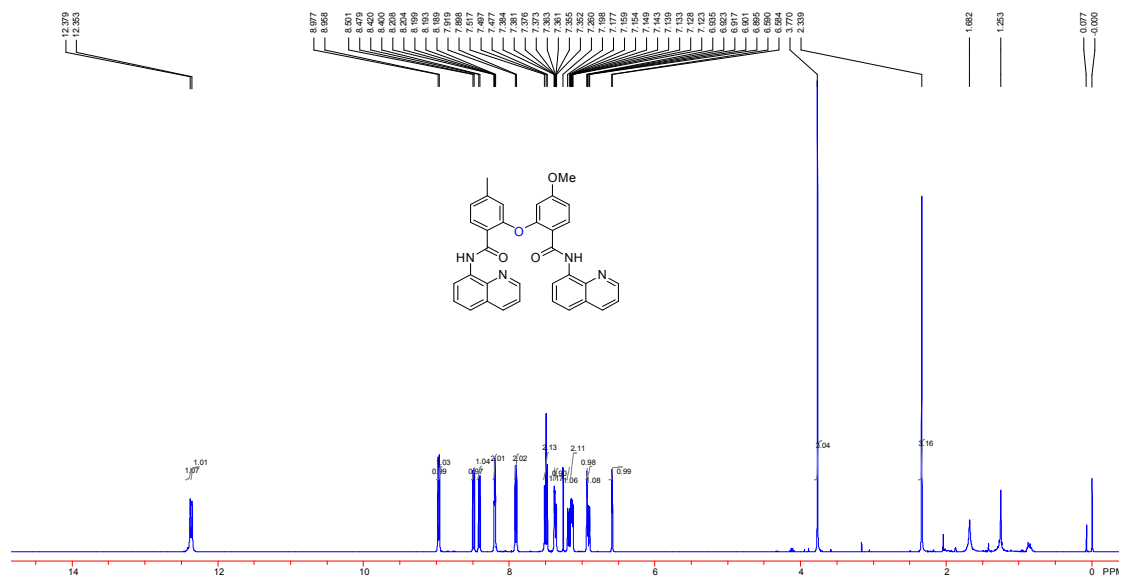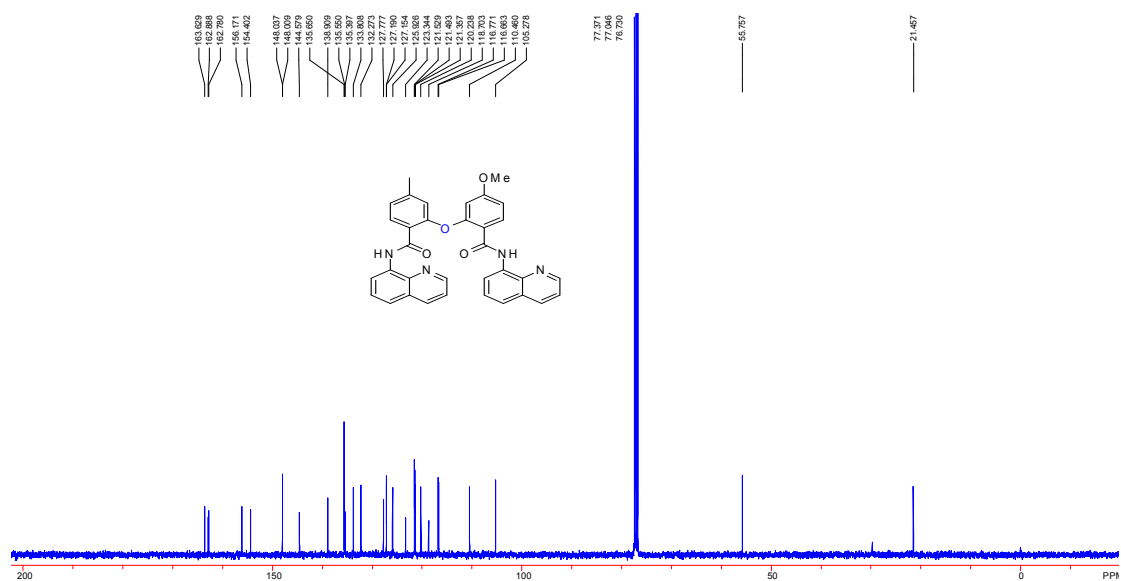

**4-methoxy-2-(3-methyl-2-(quinolin-8-ylcarbamoyl)phenoxy)-N-(quinolin-8-yl)benzamide (3h)**

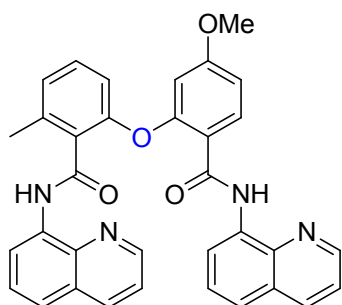

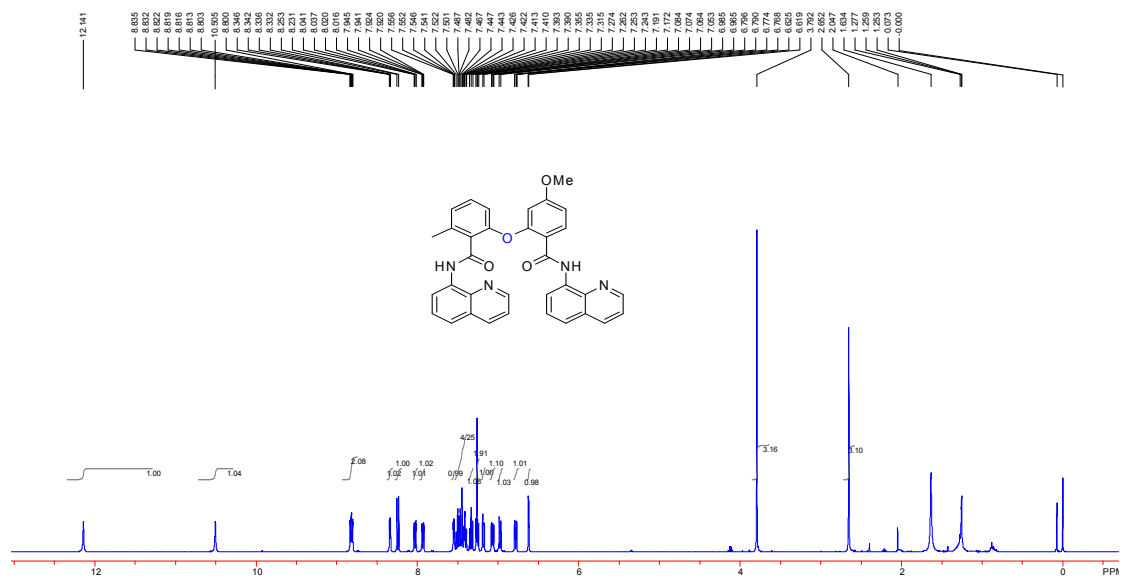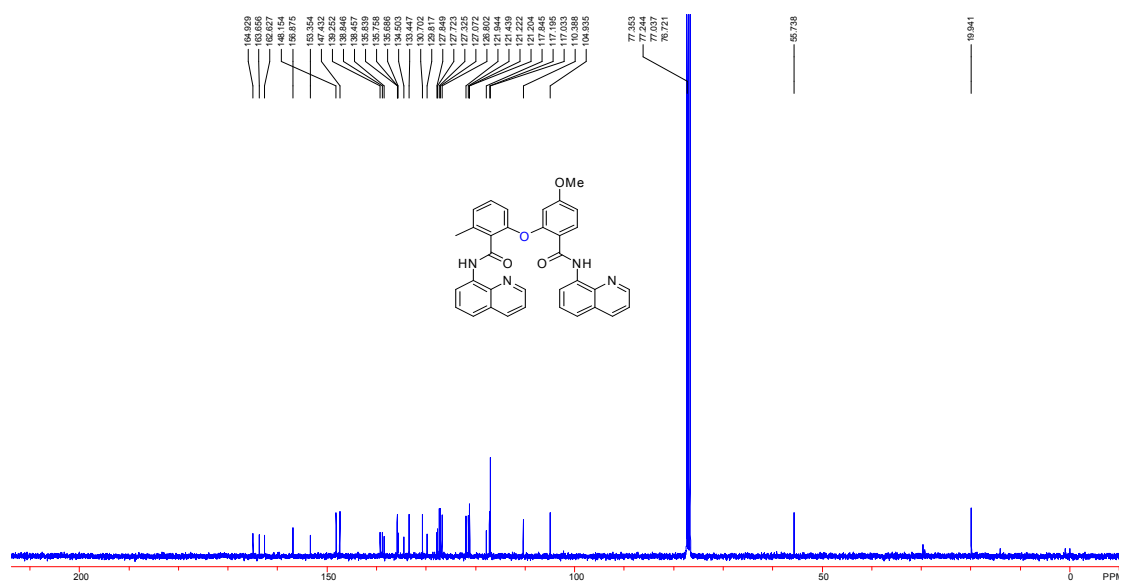

**4-methyl-N-(quinolin-8-yl)-2-(2-(quinolin-8-ylcarbamoyl)phenoxy)benzamide (3i)**

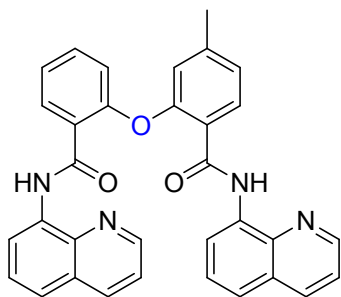

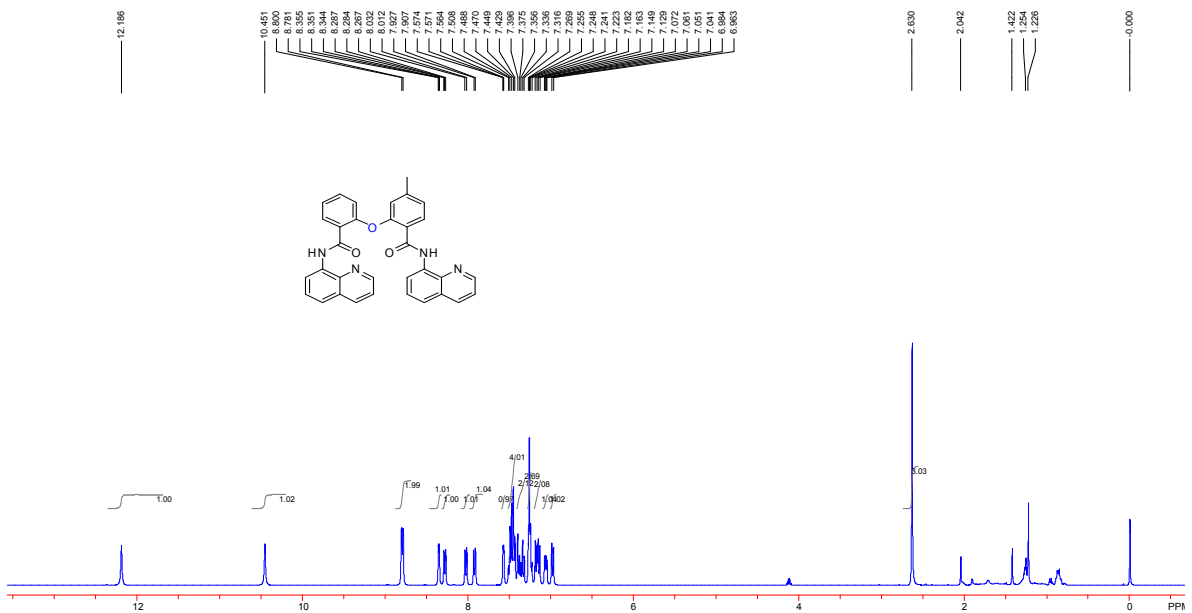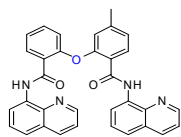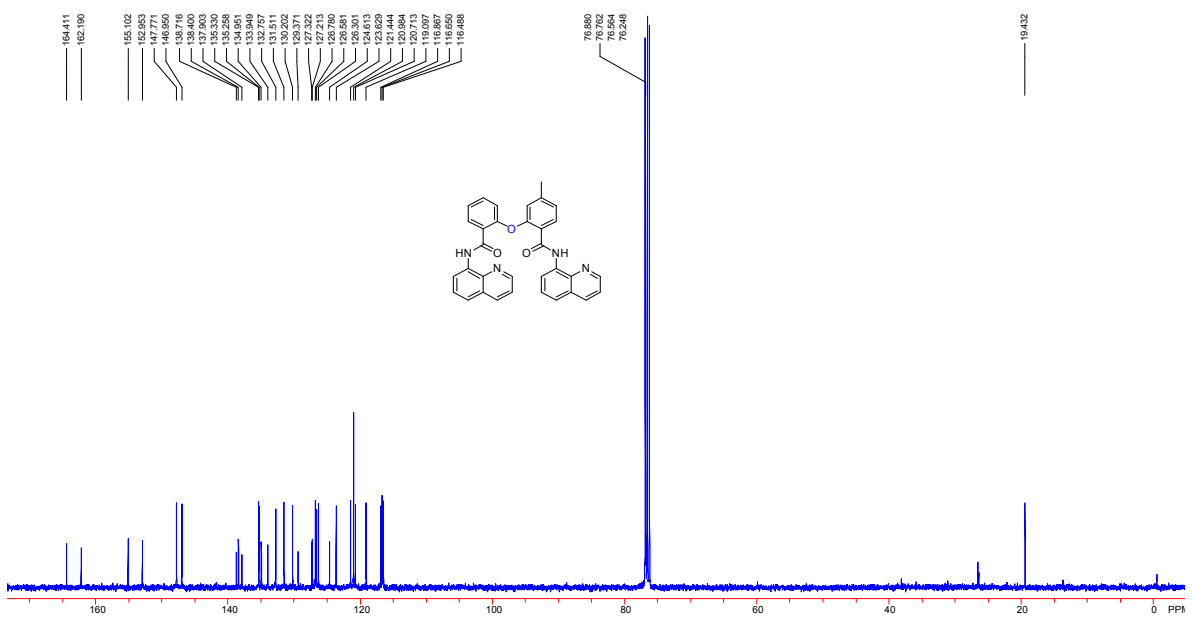

**2-hydroxy-N-(quinolin-8-yl)benzamide (4)**

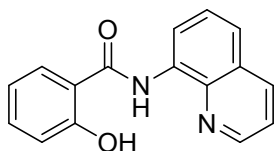

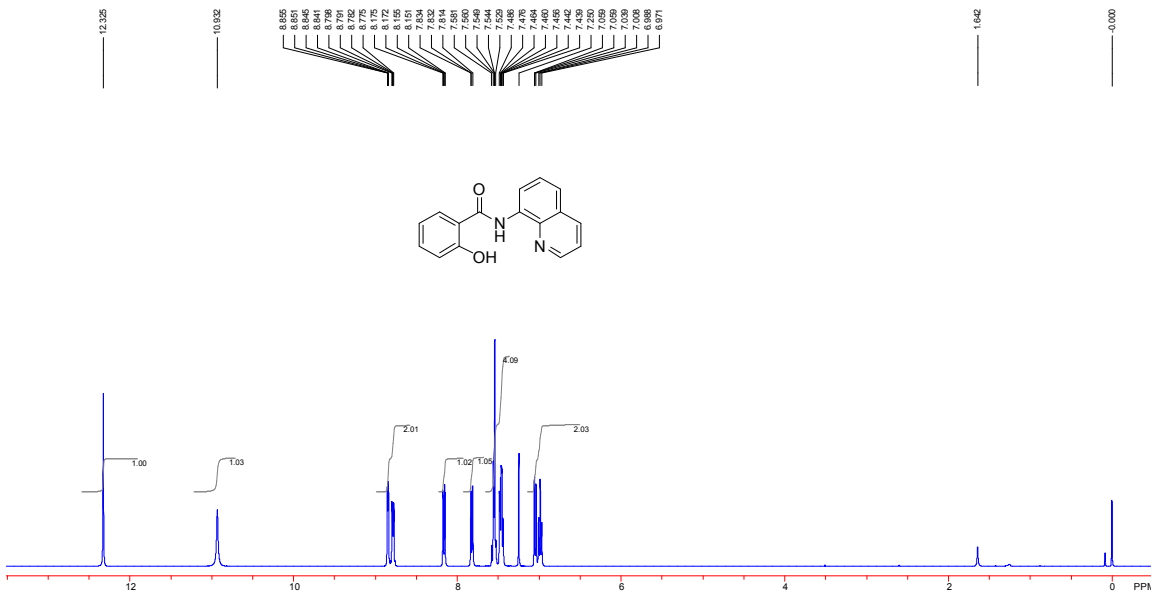

### 3-methyl-2-(quinolin-8-ylcarbamoyl)phenyl pivalate (5)

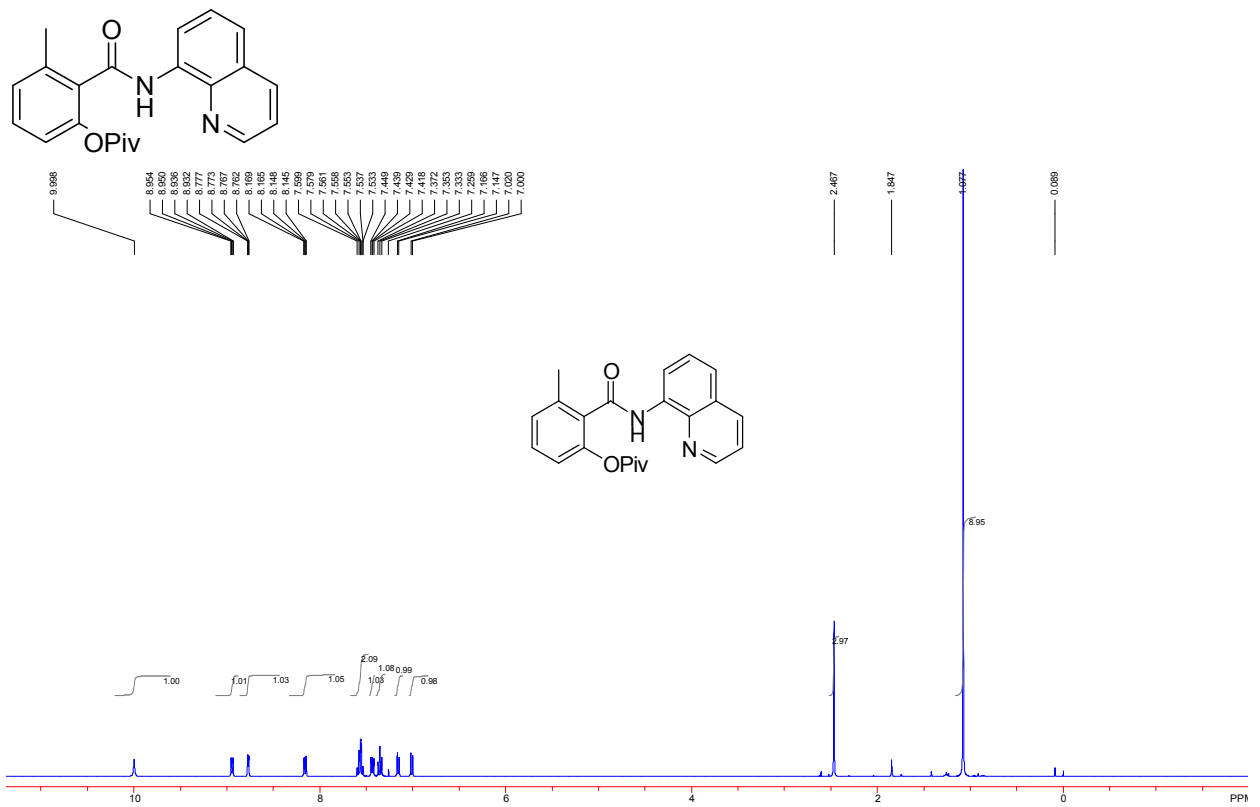

### 2,2'-oxydibenzamide (6)

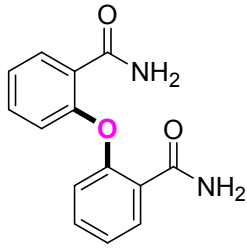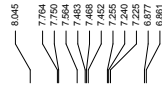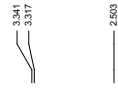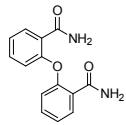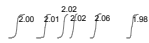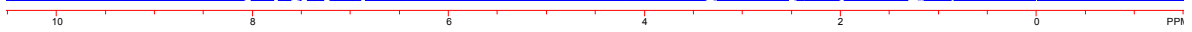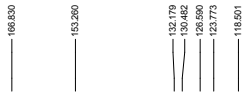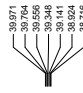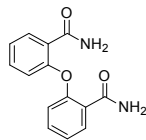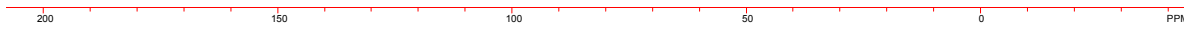

phenyl pivalate (7)

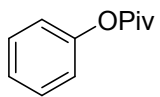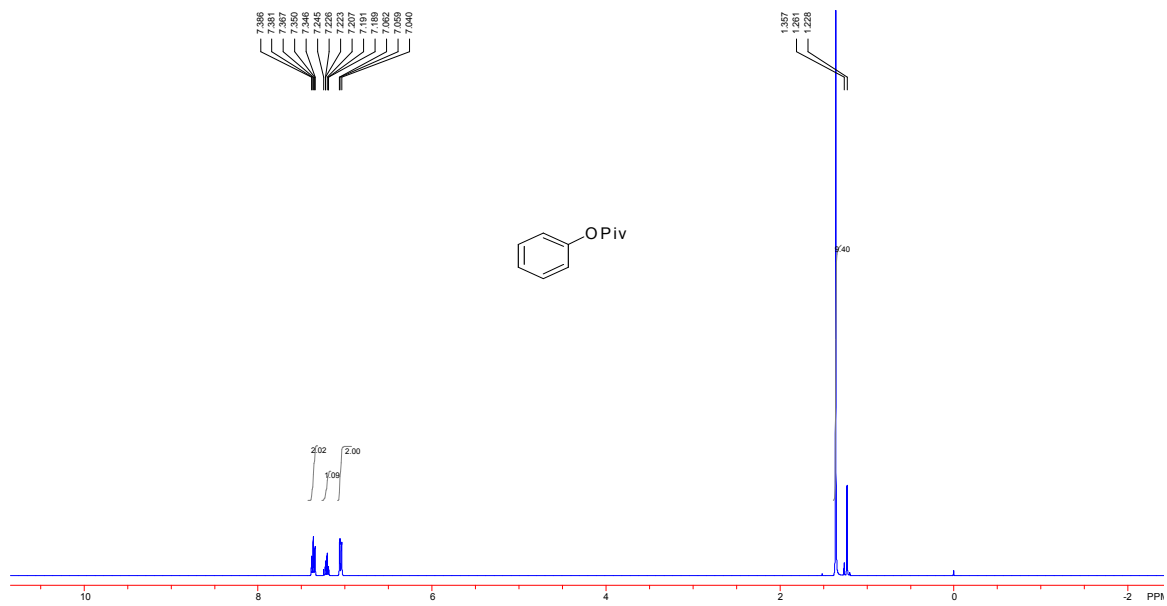

Supplement: d0qo00655f1.pdf [file d0qo00655f1.pdf]
